# Supplementary material for: Intramolecular cyclizations of cyclopropenes with indole
Source: Royal Society of Chemistry journal article supplement (doi:10.1039/c6cc02226j), 2016-01-01
Supplement: c6cc02226j1.pdf [file c6cc02226j1.pdf]

Supporting Information

**Intramolecular Cyclizations of Cyclopropenes with Indole**

Peng-Long Zhu,<sup>a</sup> Xiang-Ying Tang,<sup>\*b</sup> and Min Shi<sup>\*ab</sup>

<sup>a</sup> *Key Laboratory for Advanced Materials and Institute of Fine Chemicals, East China University of Science and Technology, 130 Mei Long Road, Shanghai 200237 China.*

<sup>b</sup> *State Key Laboratory of Organometallic Chemistry, Shanghai Institute of Organic Chemistry, Chinese Academy of Sciences, 345 Lingling Road, Shanghai 200032 China. siocxiangying@mail.sioc.ac.cn, mshi@mail.sioc.ac.cn. Fax: 86-21-64166128*

CONTENTS

|                                                                                        |     |
|----------------------------------------------------------------------------------------|-----|
| 1. General remarks.....                                                                | S2  |
| 2. General procedures and spectroscopic data of compounds <b>1</b> and <b>1'</b> ..... | S3  |
| 3. General procedures and spectroscopic data of products <b>2</b> .....                | S19 |
| 4. General procedures and spectroscopic data of compounds <b>3</b> .....               | S29 |
| 5. General procedures and spectroscopic data of products <b>4</b> .....                | S43 |
| 6. General procedures and spectroscopic data of compounds <b>5a-8a</b> .....           | S56 |
| 7. Transformations of product <b>4c</b> .....                                          | S62 |
| 8. Deuterium labeling experiment.....                                                  | S69 |
| 9. X-ray crystal data of compound <b>2b</b> .....                                      | S70 |
| 10. X-ray crystal data of compound <b>4c</b> .....                                     | S71 |
| 11. X-ray crystal data of compound <b>6a</b> .....                                     | S72 |
| 12. X-ray crystal data of compound <b>8a</b> .....                                     | S73 |
| 13. X-ray crystal data of compound <b>11c</b> .....                                    | S74 |

**General remarks:**  $^1\text{H}$  NMR spectra were recorded on a Bruker AM-300 or AM-400 spectrometer for solution in  $\text{CDCl}_3$  with tetramethylsilane (TMS) as internal standard; J-values are in Hz. High resolution mass spectra were obtained by using Agilent Technologies 6224 TOF LC/MS (ESI). All of the compounds reported in this paper gave satisfactory HRMS analytic data. Melting points were obtained with a Yanagimoto micro melting point apparatus and are uncorrected. Infrared spectra were recorded on a Perkin-Elmer PE-983 spectrometer with absorption in  $\text{cm}^{-1}$ . THF, toluene and  $\text{Et}_2\text{O}$  were distilled from sodium (Na) under argon (Ar) atmosphere.  $\text{CH}_3\text{CN}$ , 1, 2-dichloroethane and dichloromethane were distilled from  $\text{CaH}_2$  under argon (Ar) atmosphere. Commercially obtained reagents were used without further purification. All reactions were monitored by TLC with Huanghai GF254 silica gel coated plates. Flash column chromatography was carried out using 300-400 mesh silica gel at increased pressure.



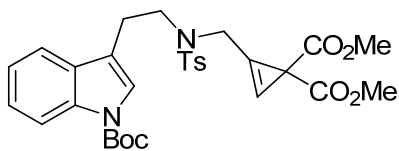

Compound **1a**: 676 mg, 58% yield; a colorless oil; IR (neat)  $\nu$  2962, 1726, 1259, 1093, 1017, 797  $\text{cm}^{-1}$ ;  $^1\text{H}$  NMR ( $\text{CDCl}_3$ , 400 MHz, TMS)  $\delta$  1.67 (9H, s), 2.40 (3H, s), 3.00 (2H, t,  $J = 8.0$  Hz), 3.53 (2H, t,  $J = 8.0$  Hz), 3.69 (6H, s), 4.52 (2H, d,  $J = 1.2$  Hz), 6.10 (1H, s), 7.21–7.26 (3H, m), 7.31 (1H, t,  $J = 7.2$  Hz), 7.43 (1H, s), 7.51 (1H, d,  $J = 8.0$  Hz), 7.68 (2H, d,  $J = 8.4$  Hz), 8.11–8.12 (1H, m);  $^{13}\text{C}$  NMR ( $\text{CDCl}_3$ , 100 MHz, TMS)  $\delta$  21.5, 24.3, 28.1, 32.8, 42.3, 47.1, 52.4, 83.6, 97.6, 109.6, 115.3, 116.6, 118.7, 122.5, 123.4, 124.4, 127.4, 129.6, 130.1, 135.4, 136.2, 143.7, 149.6, 170.5; HRMS (ESI) Calcd. for  $\text{C}_{30}\text{H}_{34}\text{N}_2\text{O}_8\text{S}$ : 582.2036, found: 582.2017.

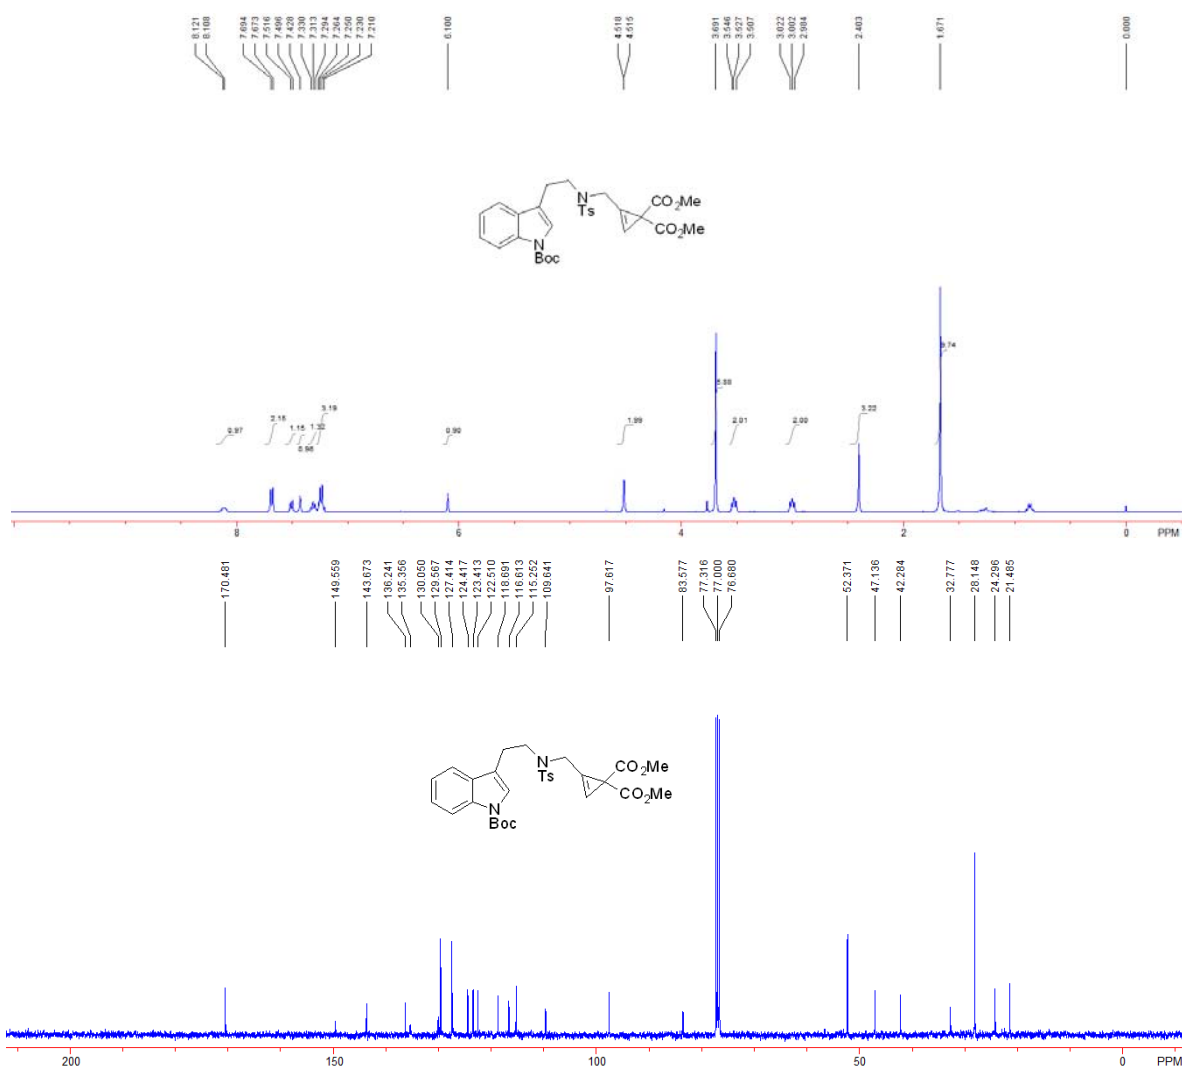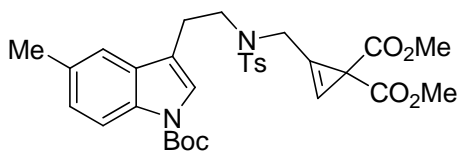

Compound **1b**: 1.684 g, 41% yield; a colorless oil; IR (neat)  $\nu$  2954, 2924, 2854, 1732, 1457, 1379, 1258, 1160, 1095  $\text{cm}^{-1}$ ;  $^1\text{H}$  NMR ( $\text{CDCl}_3$ , 400 MHz, TMS)  $\delta$  1.66 (9H, s), 2.39 (3H, s), 2.44 (3H, s), 2.97 (2H, t,  $J = 7.2$  Hz), 3.53 (2H, t,  $J = 7.2$  Hz), 3.69 (6H, s), 4.53 (2H, s), 6.14 (1H, s), 7.12 (1H, d,  $J = 8.4$  Hz), 7.24 (2H, d,  $J = 7.6$  Hz), 7.29 (1H, s), 7.40 (1H, s), 7.69 (2H, d,  $J = 7.6$  Hz), 7.98 (1H, s);  $^{13}\text{C}$  NMR ( $\text{CDCl}_3$ , 100 MHz, TMS)  $\delta$  21.1, 21.3, 24.0, 28.0, 32.6, 42.0, 46.9, 52.2, 83.2, 97.4, 109.4, 114.7, 116.2, 118.5, 123.3, 125.6, 127.2, 129.4, 130.1, 131.8, 133.4, 136.0, 143.5, 149.4, 170.3; HRMS (ESI) Calcd. for  $\text{C}_{31}\text{H}_{36}\text{N}_2\text{O}_8\text{S}$ : 596.2192, found: 596.2184.

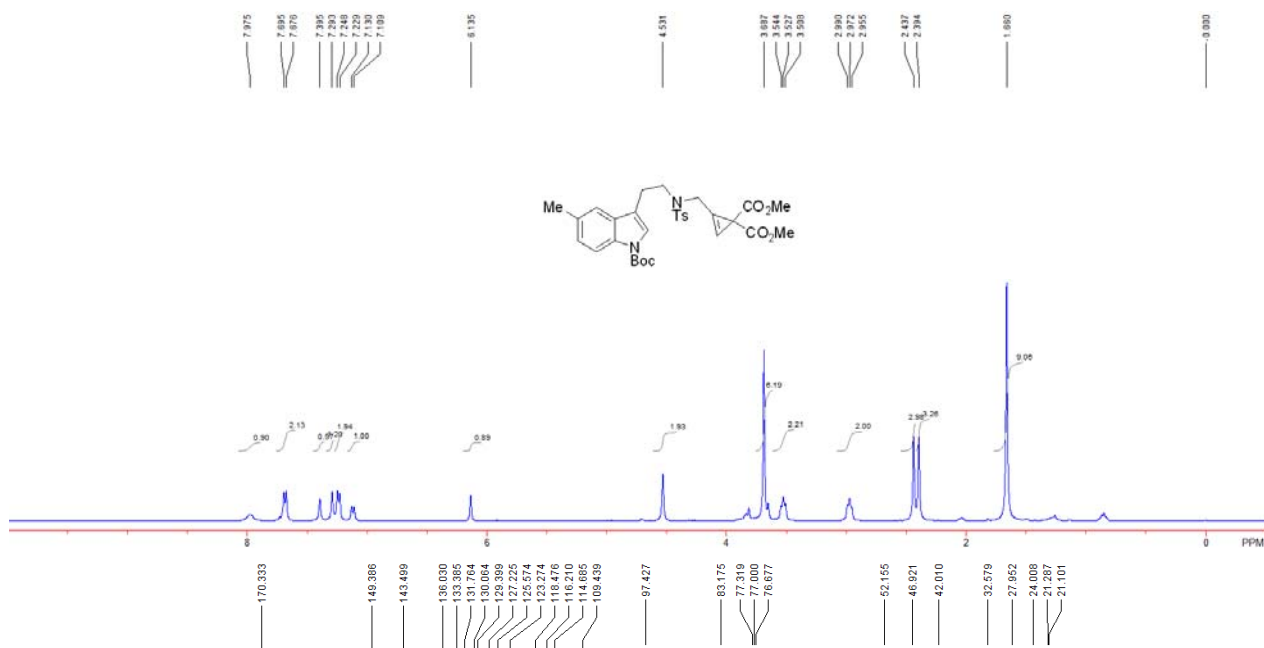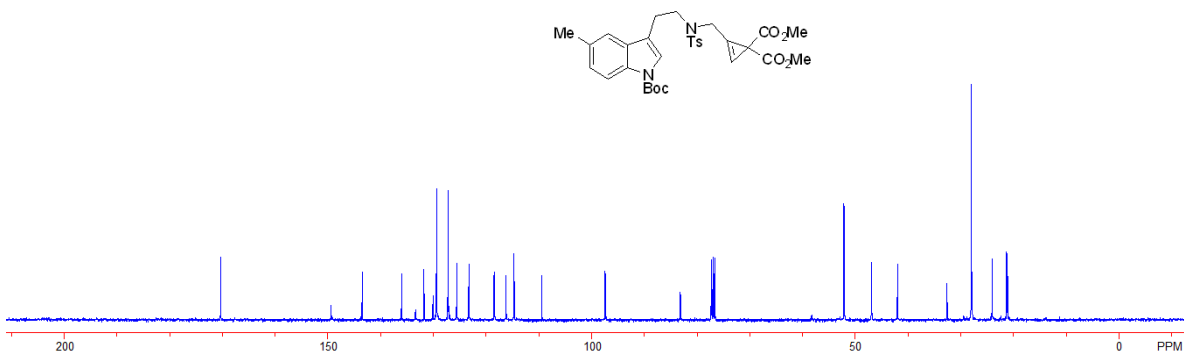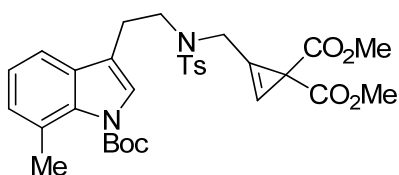

Compound **1c**: 1.895 g, 76% yield; a colorless oil; IR (neat)  $\nu$  2956, 2929, 1739, 1349, 1258, 1156, 1047, 737  $\text{cm}^{-1}$ ;  $^1\text{H}$  NMR ( $\text{CDCl}_3$ , 400 MHz, TMS)  $\delta$  1.63 (9H, s), 2.37 (3H, s), 2.62 (3H, s), 2.95–2.99 (2H, m), 3.50–3.54 (2H, m), 3.67 (6H, s), 4.51 (2H, s), 6.12 (1H, d,  $J = 0.8$  Hz), 7.08 (1H, d,  $J = 6.4$  Hz), 7.14 (1H, t,  $J = 7.6$  Hz), 7.22 (2H, d,  $J = 8.0$  Hz), 7.32 (1H, d,  $J = 7.6$  Hz), 7.43 (1H, s), 7.68 (2H, d,  $J = 8.0$  Hz);  $^{13}\text{C}$  NMR ( $\text{CDCl}_3$ , 100 MHz, TMS)  $\delta$  21.1, 21.8, 23.8, 27.6, 32.4, 41.8, 46.7, 52.0, 82.9, 97.3, 109.2, 115.9, 116.0, 122.7, 125.1, 125.5, 127.1, 127.5, 129.3, 131.1, 134.6, 135.9, 143.4, 149.0, 170.1; HRMS (ESI) Calcd. for  $\text{C}_{31}\text{H}_{36}\text{N}_2\text{O}_8\text{S}$ : 596.2192, found: 596.2192.

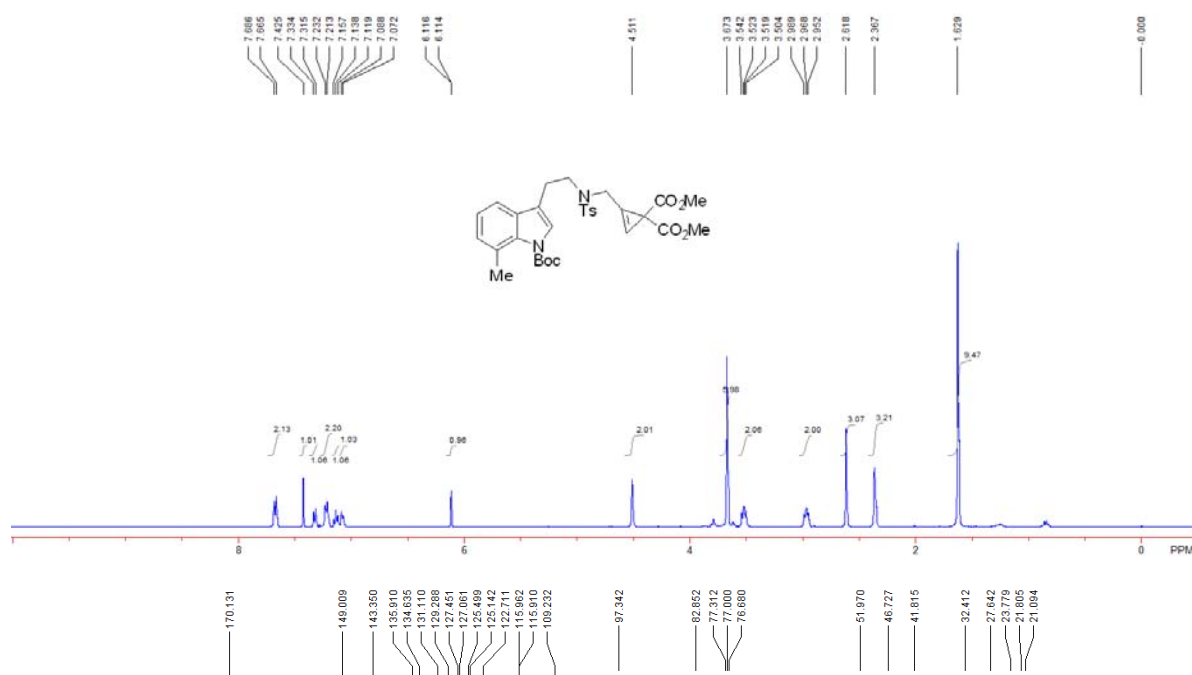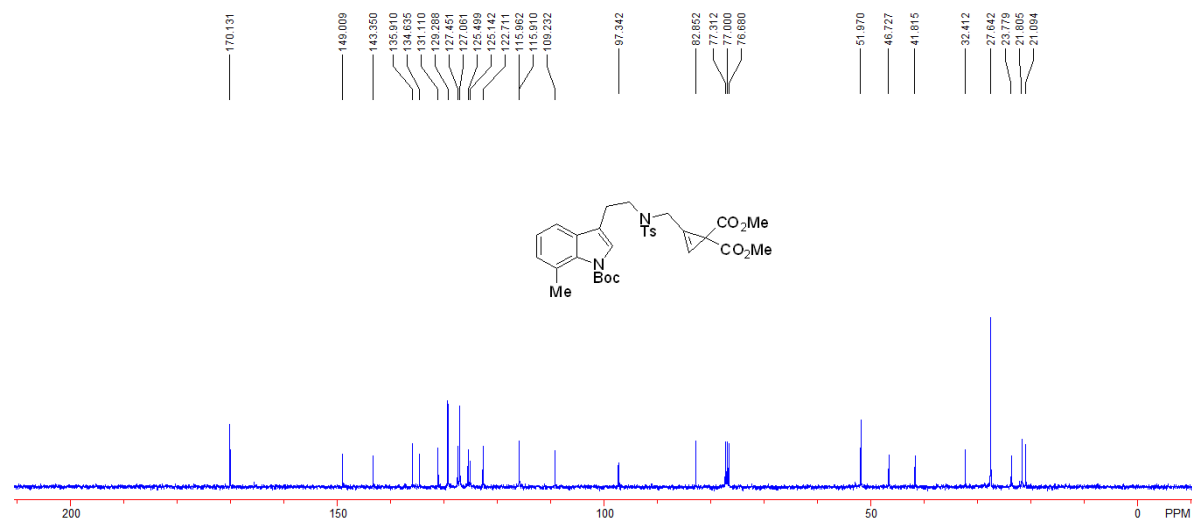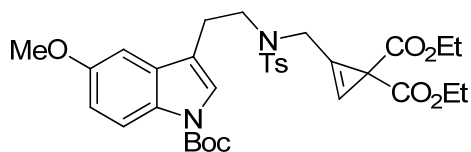

Compound **1d**: 439 mg, 51% yield; a colorless oil; IR (neat)  $\nu$  3139, 2974, 2930, 1723, 1478, 1449, 1386, 1369, 1274, 1257, 1156, 1094, 1061  $\text{cm}^{-1}$ ;  $^1\text{H}$  NMR ( $\text{CDCl}_3$ , 400 MHz, TMS)  $\delta$  1.25 (6H, t,  $J = 7.2$  Hz), 1.66 (9H, s), 2.40 (3H, s), 3.00 (2H, t,  $J = 7.6$  Hz), 3.53 (2H, t,  $J = 7.6$  Hz), 3.87 (3H, s), 4.15 (4H, q,  $J = 7.2$  Hz), 4.52 (2H, s), 6.10 (1H, s), 6.92 (1H, dd,  $J = 2.4, 9.2$  Hz), 7.05 (1H, d,  $J = 2.4$  Hz), 7.24 (2H, d,  $J = 8.4$  Hz), 7.41 (1H, s), 7.69 (2H, d,  $J = 8.4$  Hz), 8.00 (1H, s);  $^{13}\text{C}$  NMR ( $\text{CDCl}_3$ , 100 MHz, TMS)  $\delta$  13.9, 21.3, 24.3, 27.9, 32.9, 42.2, 46.9, 55.4, 61.0, 83.2, 97.5, 101.2, 109.7, 113.0, 115.8, 116.4, 123.8, 127.2, 129.4, 130.8, 136.1, 143.5, 149.3, 155.7, 170.0; HRMS (ESI) Calcd. for  $\text{C}_{33}\text{H}_{44}\text{N}_3\text{O}_9\text{S}^{1+}$  ( $\text{M}^+ + \text{NH}_4$ ):, 658.2793, found: 658.2774.

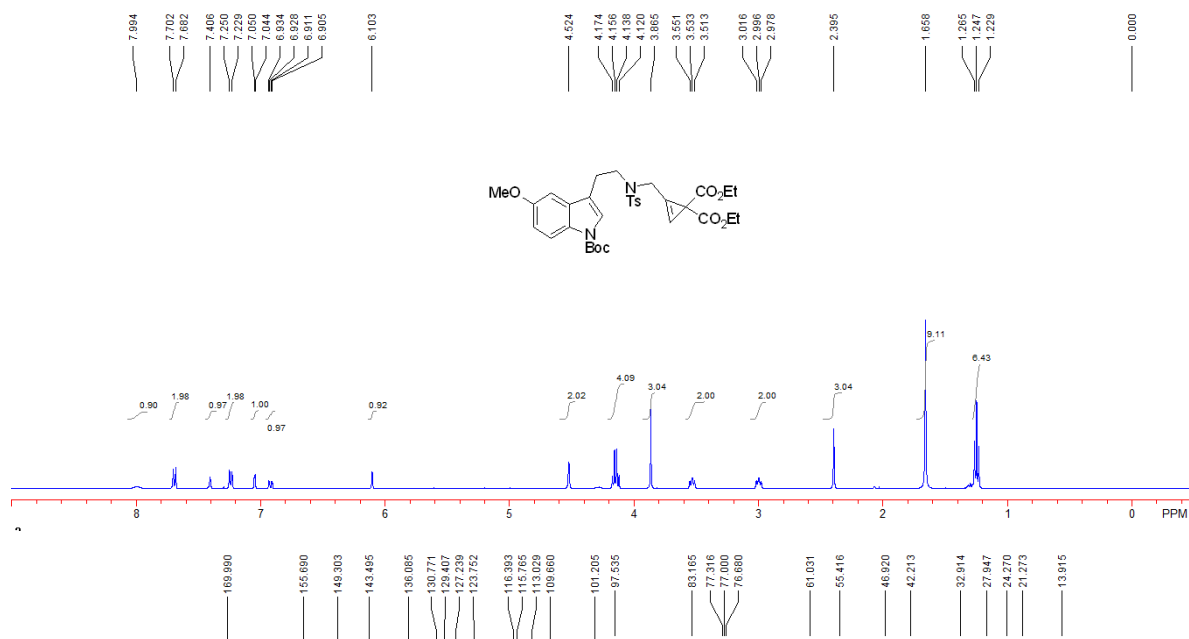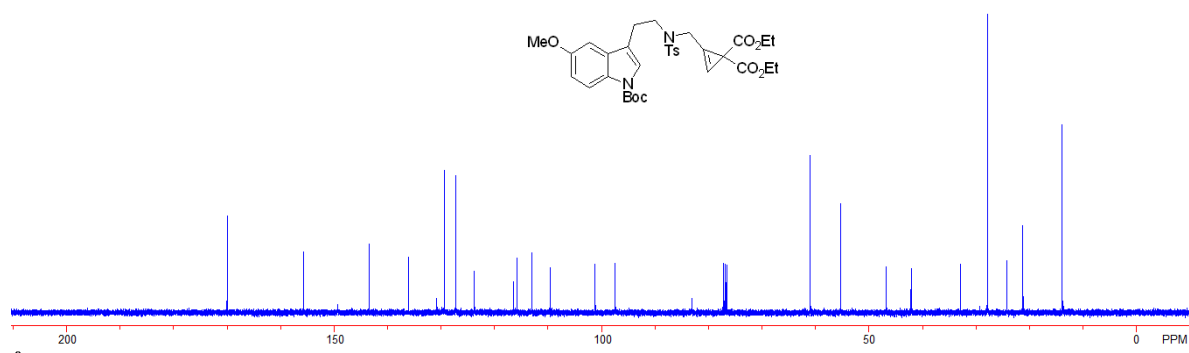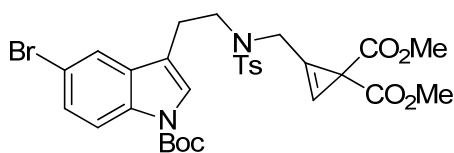

Compound **1e**: 681 mg, 53% yield; a colorless oil; IR (neat)  $\nu$  3145, 2979, 2952, 2930, 1728, 1450, 1371, 1277, 1255, 1156, 1103, 1057  $\text{cm}^{-1}$ ;  $^1\text{H}$  NMR ( $\text{CDCl}_3$ , 400 MHz, TMS)  $\delta$  1.67 (9H, s), 2.40 (3H, s), 2.95 (2H, t,  $J =$

7.6 Hz), 3.51 (2H, t,  $J = 7.6$  Hz), 3.70 (6H, s), 4.53 (2H, s), 6.18 (1H, s), 7.25 (2H, d,  $J = 8.4$  Hz), 7.37 (1H, dd,  $J = 2.0, 8.8$  Hz), 7.46 (1H, s), 7.61 (1H, d,  $J = 2.0$  Hz), 7.69 (2H, d,  $J = 8.4$  Hz), 7.98–8.00 (1H, m);  $^{13}\text{C}$  NMR ( $\text{CDCl}_3$ , 100 MHz, TMS)  $\delta$  21.3, 23.7, 27.9, 32.6, 41.9, 46.7, 52.2, 83.8, 97.6, 109.4, 115.7, 115.8, 116.5, 121.2, 124.4, 126.9, 127.2, 129.4, 131.6, 133.9, 135.9, 143.6, 148.9, 170.3; HRMS (ESI) Calcd. for  $\text{C}_{30}\text{H}_{33}\text{BrN}_2\text{O}_8\text{S}$ : 660.1141, found: 660.1128.

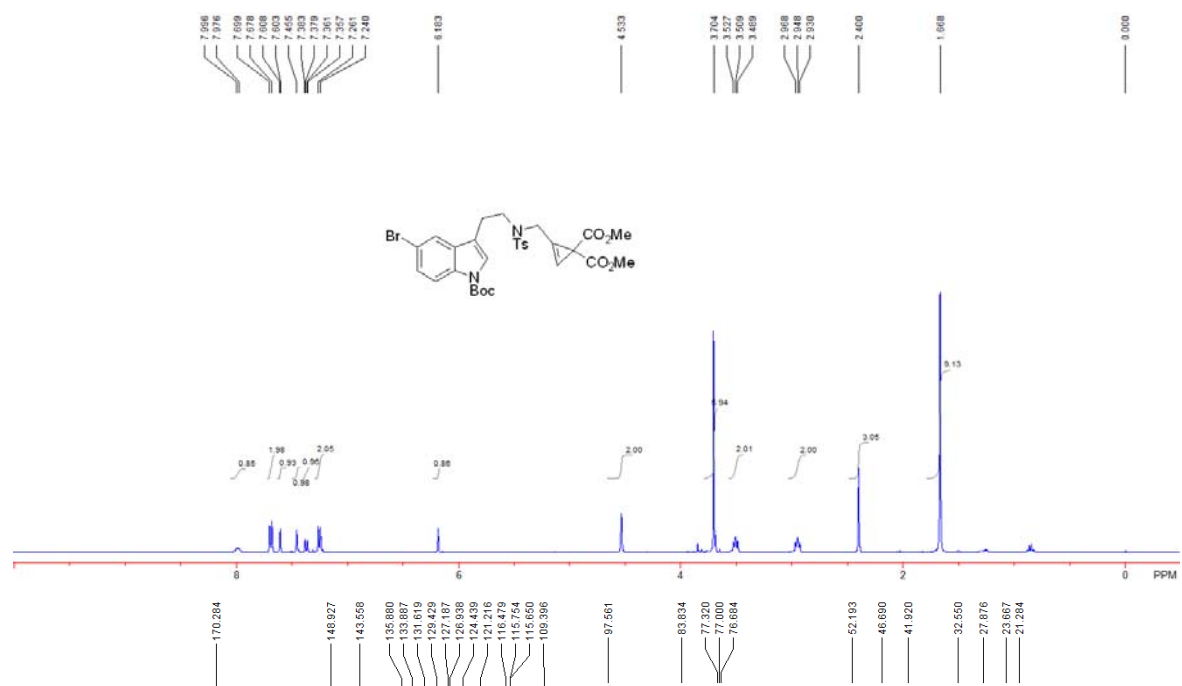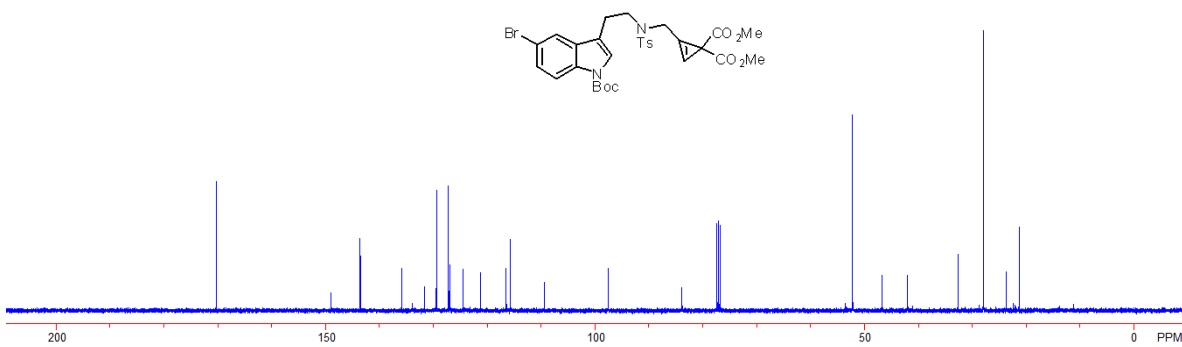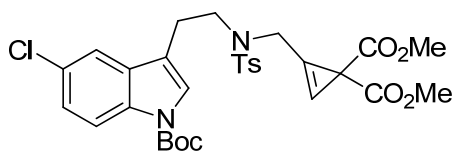

Compound **1f**: 231 mg, 52% yield; a yellow oil; IR (neat)  $\nu$  3145, 2979, 2952, 2930, 1731, 1452, 1372, 1278, 1257, 1158, 1064  $\text{cm}^{-1}$ ;  $^1\text{H}$  NMR ( $\text{CDCl}_3$ , 400 MHz, TMS)  $\delta$  1.67 (9H, s), 2.41 (3H, s), 2.93–2.97 (2H, m), 3.48–3.52 (2H, m), 3.71 (6H, s), 4.52 (2H, d,  $J = 1.2$  Hz), 6.14 (1H, t,  $J = 1.2$  Hz), 7.24–7.27 (3H, m), 7.44 (1H,



d,  $J = 2.0$  Hz), 7.47 (1H, s), 7.69 (2H, d,  $J = 8.4$  Hz), 8.03–8.05 (1H, m);  $^{13}\text{C}$  NMR ( $\text{CDCl}_3$ , 100 MHz, TMS)  $\delta$  21.5, 24.0, 28.1, 32.8, 42.2, 46.9, 52.4, 84.0, 97.7, 109.6, 116.0, 116.3, 118.4, 124.5, 124.8, 127.4, 128.2, 129.6, 131.3, 133.7, 136.1, 143.8, 149.2, 170.5; HRMS (ESI) Calcd. for  $\text{C}_{30}\text{H}_{33}\text{ClN}_2\text{O}_8\text{S}$ : 616.1646, found: 616.1663.

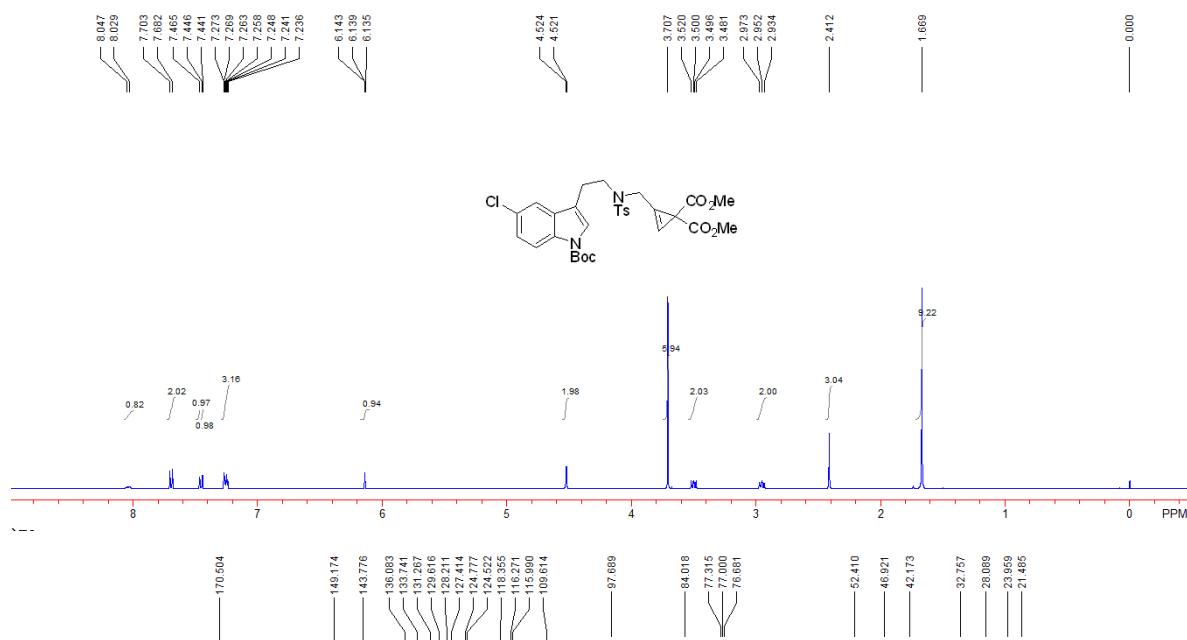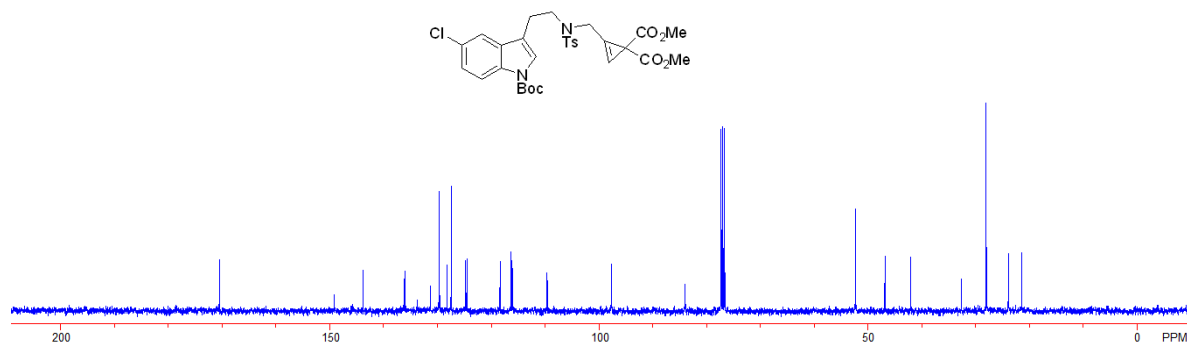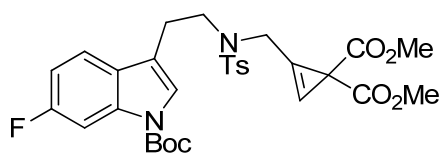

Compound **1g**: 1.194 g, 74% yield; a yellow oil; IR (neat)  $\nu$  3139, 2980, 2953, 2930, 1726, 1441, 1370, 1274, 1252, 1156, 1095, 1067, 734  $\text{cm}^{-1}$ ;  $^1\text{H}$  NMR ( $\text{CDCl}_3$ , 400 MHz, TMS)  $\delta$  1.67 (9H, s), 2.41 (3H, s), 2.97–3.00 (2H, m), 3.50–3.54 (2H, m), 3.70 (6H, s), 4.51 (2H, s), 6.13 (1H, s), 6.95–7.00 (1H, m), 7.24 (2H, d,  $J = 8.4$  Hz), 7.41–7.45 (2H, m), 7.68 (2H, d,  $J = 8.4$  Hz), 7.83–7.85 (1H, m);  $^{13}\text{C}$  NMR ( $\text{CDCl}_3$ , 100 MHz, TMS)  $\delta$  21.4, 24.1, 28.0, 32.7, 42.1, 47.0, 52.3, 83.9, 97.6, 102.5 (d,  $J = 28.5$  Hz), 109.5, 110.6 (d,  $J = 23.9$  Hz), 116.4 (d,  $J = 0.8$  Hz), 119.3 (d,  $J = 10.3$  Hz), 123.5 (d,  $J = 3.8$  Hz), 126.3, 127.3, 129.5, 136.1, 143.6, 149.2, 160.8 (d,



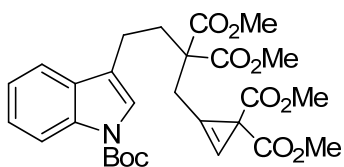

Compound **1h**: 143 mg, 53% yield; a white solid; mp.103–105 °C; IR (neat)  $\nu$  3139, 2954, 1728, 1453, 1435, 1372, 1273, 1254, 1158, 1065, 749  $\text{cm}^{-1}$ ;  $^1\text{H}$  NMR ( $\text{CDCl}_3$ , 400 MHz, TMS)  $\delta$  1.67 (9H, s), 2.40–2.46 (2H, m), 2.63–2.67 (2H, m), 3.34 (2H, s), 3.68 (6H, s), 3.76 (6H, s), 6.55 (1H, s), 7.23 (1H, t,  $J = 7.6$  Hz), 7.31 (1H, t,  $J = 7.6$  Hz), 7.40 (1H, s), 7.52 (1H, d,  $J = 7.6$  Hz), 8.12–8.13 (1H, m);  $^{13}\text{C}$  NMR ( $\text{CDCl}_3$ , 100 MHz, TMS)  $\delta$  19.7, 27.7, 28.0, 31.8, 32.0, 52.1, 52.8, 56.0, 83.3, 97.0, 110.2, 115.1, 118.7, 119.3, 122.2, 122.4, 124.2, 130.1, 135.3, 149.5, 170.2, 170.8; HRMS (ESI) Calcd. for  $\text{C}_{28}\text{H}_{37}\text{N}_2\text{O}_{10}^+$  ( $\text{M}^+ + \text{NH}_4$ ): 561.2443, found: 561.2429.

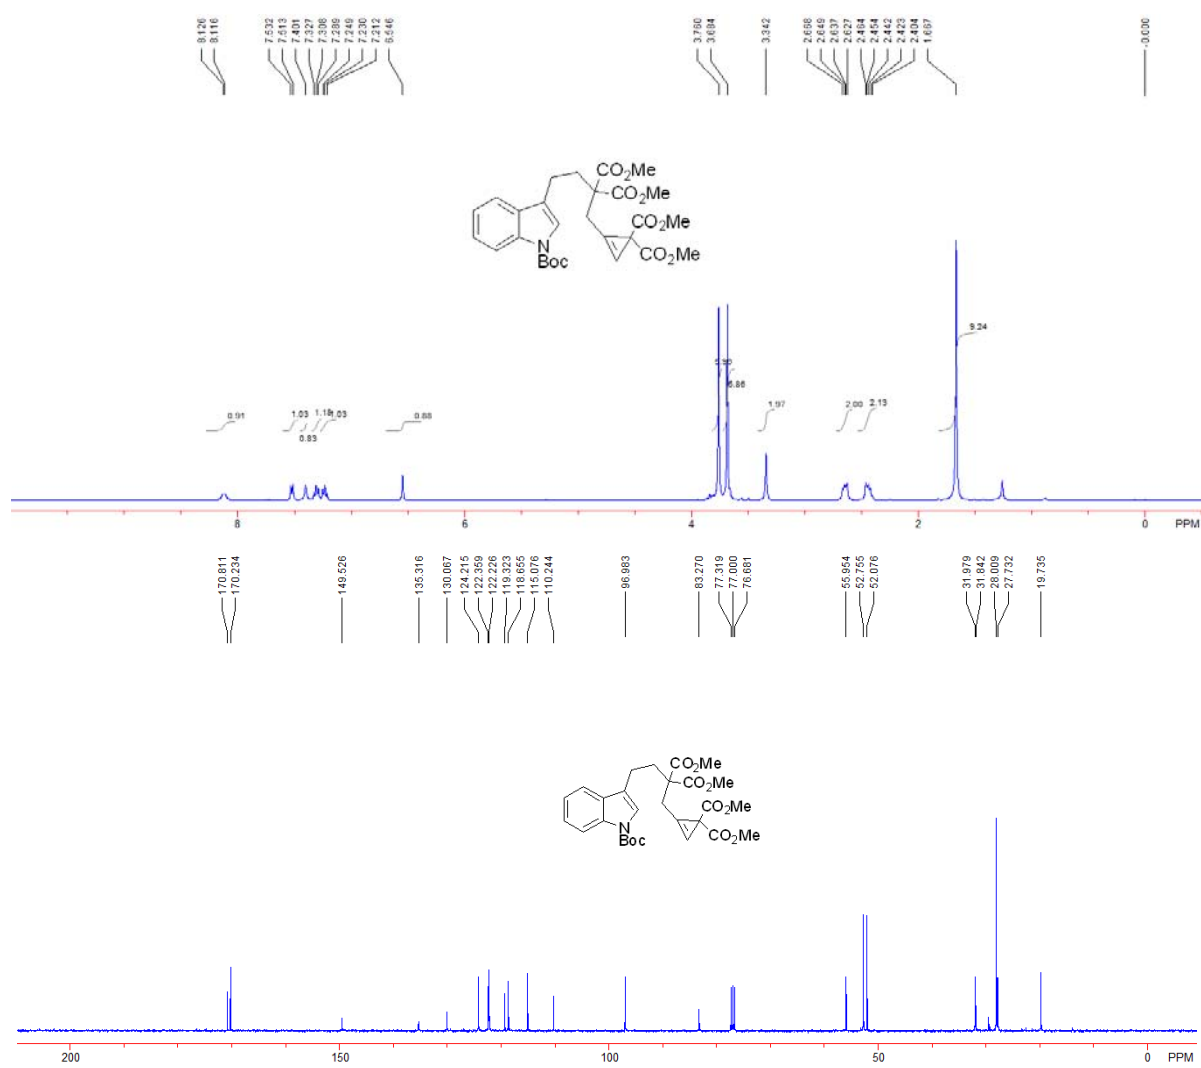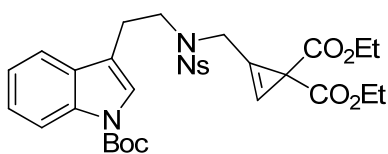

Compound **1i**: 126 mg, 15% yield; a colorless oil; IR (neat)  $\nu$  2960, 2925, 2871, 2855, 1724, 1530, 1452, 1367, 1349, 1258, 1158, 1097, 1060, 1017, 742  $\text{cm}^{-1}$ ;  $^1\text{H}$  NMR ( $\text{CDCl}_3$ , 400 MHz, TMS)  $\delta$  1.26 (6H, t,  $J = 7.2$  Hz), 1.68 (9H, s), 3.01 (2H, t,  $J = 7.2$  Hz), 3.62 (2H, t,  $J = 7.2$  Hz), 4.16 (4H, q,  $J = 7.2$  Hz), 4.63 (2H, s), 6.37 (1H, s), 7.21 (1H, t,  $J = 7.2$  Hz), 7.29 (1H, t,  $J = 7.2$  Hz), 7.39 (1H, s), 7.45 (1H, d,  $J = 7.6$  Hz), 7.86 (2H, d,  $J = 8.4$  Hz), 8.01–8.03 (1H, m), 8.13 (2H, d,  $J = 8.4$  Hz);  $^{13}\text{C}$  NMR ( $\text{CDCl}_3$ , 100 MHz, TMS)  $\delta$  14.0, 23.8, 28.0, 33.2, 41.6, 46.8, 61.4, 83.9, 98.5, 109.6, 115.2, 116.0, 118.5, 122.5, 123.5, 123.8, 124.5, 128.2, 129.7, 135.2, 144.9, 149.4, 149.7, 170.0; HRMS (ESI) Calcd. for  $\text{C}_{31}\text{H}_{39}\text{N}_4\text{O}_{10}\text{S}^{1+}$  ( $\text{M}^+ + \text{NH}_4$ ): 659.2381, found: 659.2374.

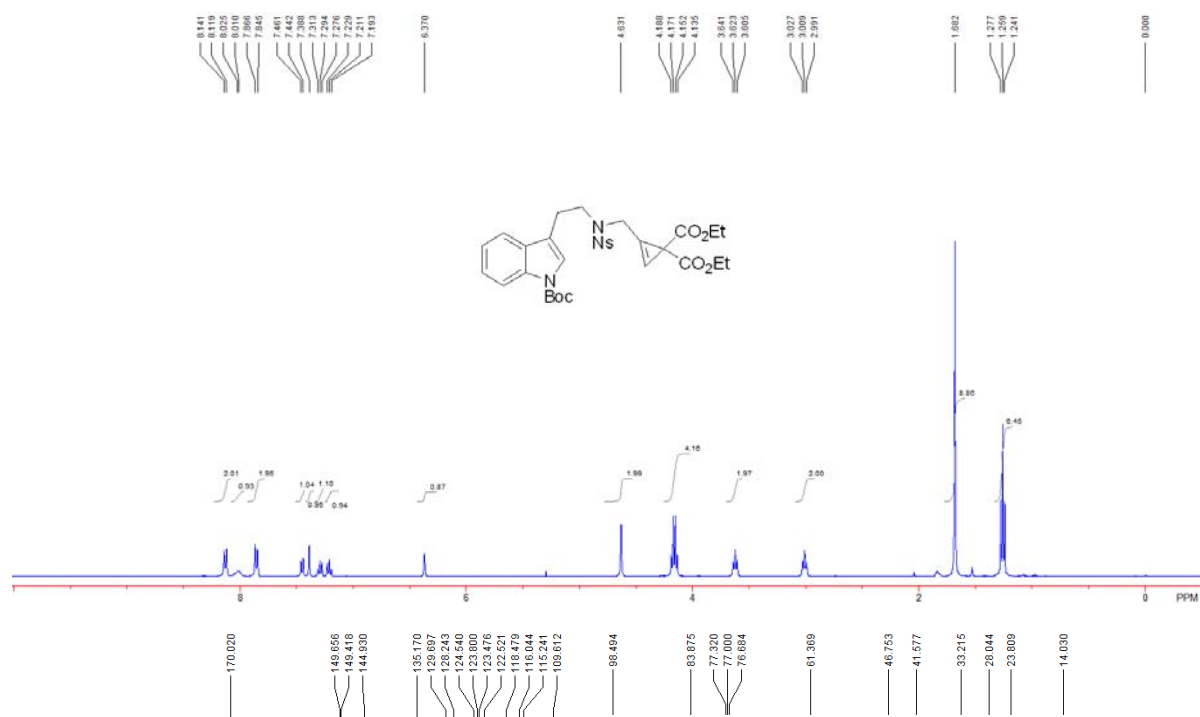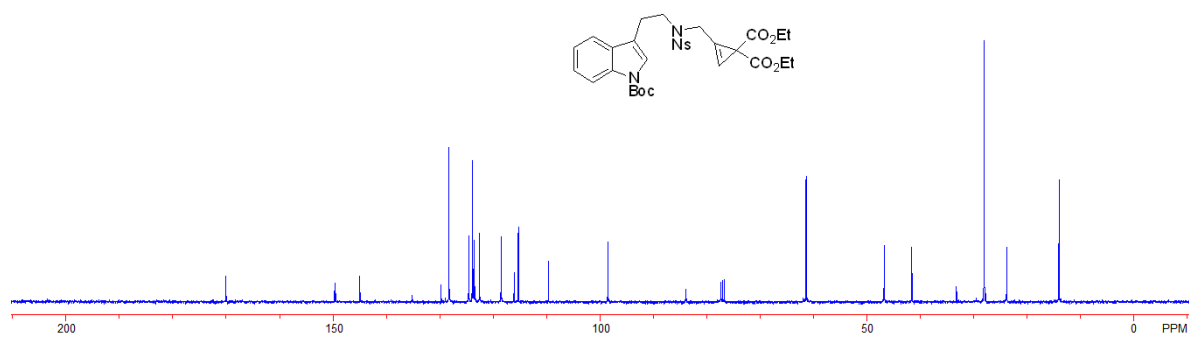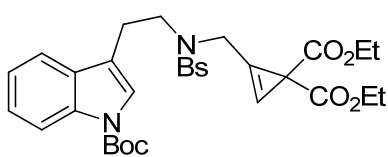

Compound **1j**: 26 mg, 16% yield; a colorless oil; IR (neat)  $\nu$  2983, 2929, 2874, 2854, 1735, 1453, 1369, 1257,

1155, 1097, 1020, 749  $\text{cm}^{-1}$ ;  $^1\text{H}$  NMR ( $\text{CDCl}_3$ , 400 MHz, TMS)  $\delta$  1.25 (6H, t,  $J = 7.2$  Hz), 1.68 (9H, s), 3.02 (2H, t,  $J = 7.6$  Hz), 3.53–3.57 (2H, m), 4.16 (4H, q,  $J = 7.2$  Hz), 4.55 (2H, d,  $J = 1.2$  Hz), 6.20 (1H, s), 7.23 (1H, dd,  $J = 7.2, 7.6$  Hz), 7.30–7.34 (1H, m), 7.42 (1H, s), 7.50 (1H, d,  $J = 7.6$  Hz), 7.55 (2H, d,  $J = 8.4$  Hz), 7.64 (2H, d,  $J = 8.4$  Hz), 8.10–8.12 (1H, m);  $^{13}\text{C}$  NMR ( $\text{CDCl}_3$ , 100 MHz, TMS)  $\delta$  14.1, 24.2, 28.2, 33.2, 42.1, 47.0, 61.4, 83.7, 98.1, 109.7, 115.3, 116.4, 118.7, 122.6, 123.5, 124.5, 127.8, 128.9, 130.0, 132.2, 138.3, 149.6, 170.1; HRMS (ESI) Calcd. for  $\text{C}_{31}\text{H}_{39}\text{BrN}_3\text{O}_8\text{S}^{1+}$  ( $\text{M}^+ + \text{NH}_4$ ): 692.1636, found: 692.1623.

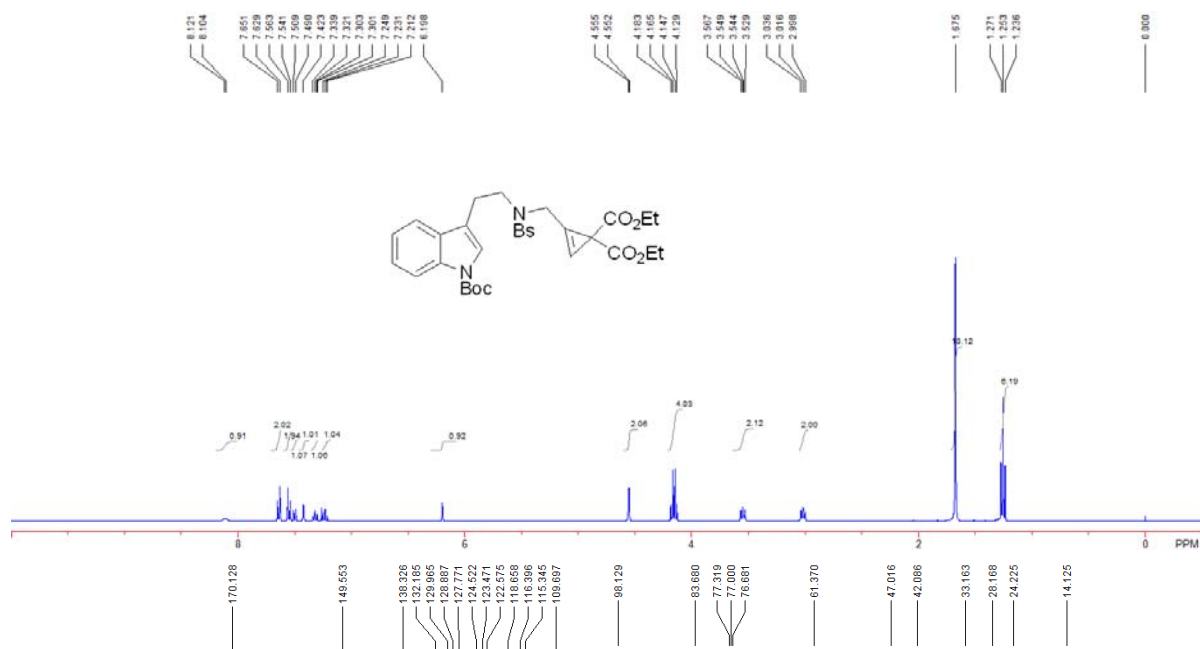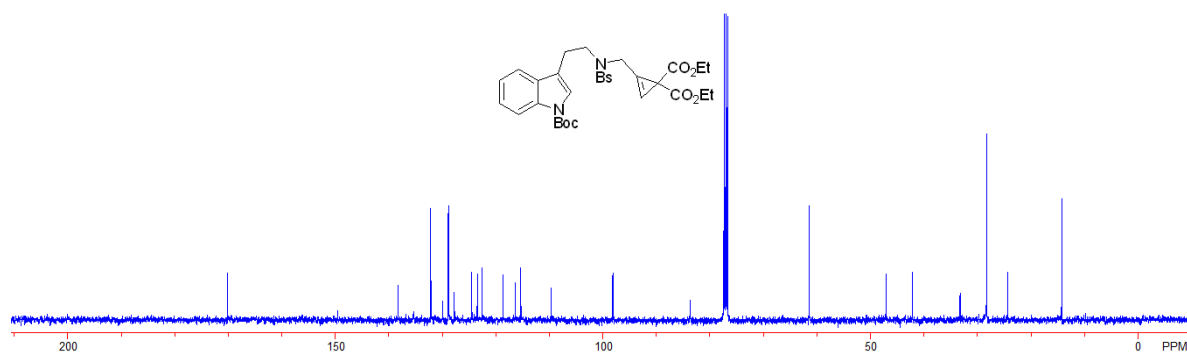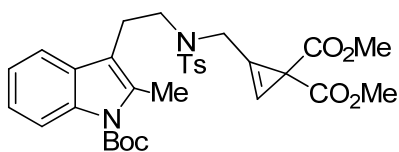

Compound **1k**: 429 mg, 55% yield; a colorless oil; IR (neat)  $\nu$  2953, 2929, 1727, 1458, 1356, 1322, 1253, 1158, 1137, 748  $\text{cm}^{-1}$ ;  $^1\text{H}$  NMR ( $\text{CDCl}_3$ , 400 MHz, TMS)  $\delta$  1.68 (9H, s), 2.39 (3H, s), 2.53 (3H, s), 2.98–3.02 (2H,

m), 3.35–3.38 (2H, m), 3.67 (6H, s), 4.51 (2H, d,  $J = 1.2$  Hz), 6.12 (1H, s), 7.17–7.24 (4H, m), 7.41–7.43 (1H, m), 7.67 (2H, d,  $J = 8.0$  Hz), 8.08 (1H, d,  $J = 7.2$  Hz);  $^{13}\text{C}$  NMR ( $\text{CDCl}_3$ , 100 MHz, TMS)  $\delta$  13.7, 21.4, 23.7, 28.1, 32.7, 42.6, 47.0, 52.2, 83.6, 97.4, 109.7, 114.1, 115.3, 117.3, 122.5, 123.4, 127.3, 129.3, 129.5, 134.2, 135.5, 136.2, 143.6, 150.5, 170.3; HRMS (ESI) Calcd. for  $\text{C}_{31}\text{H}_{36}\text{N}_2\text{O}_8\text{S}$ : 596.2192, found: 596.2192.

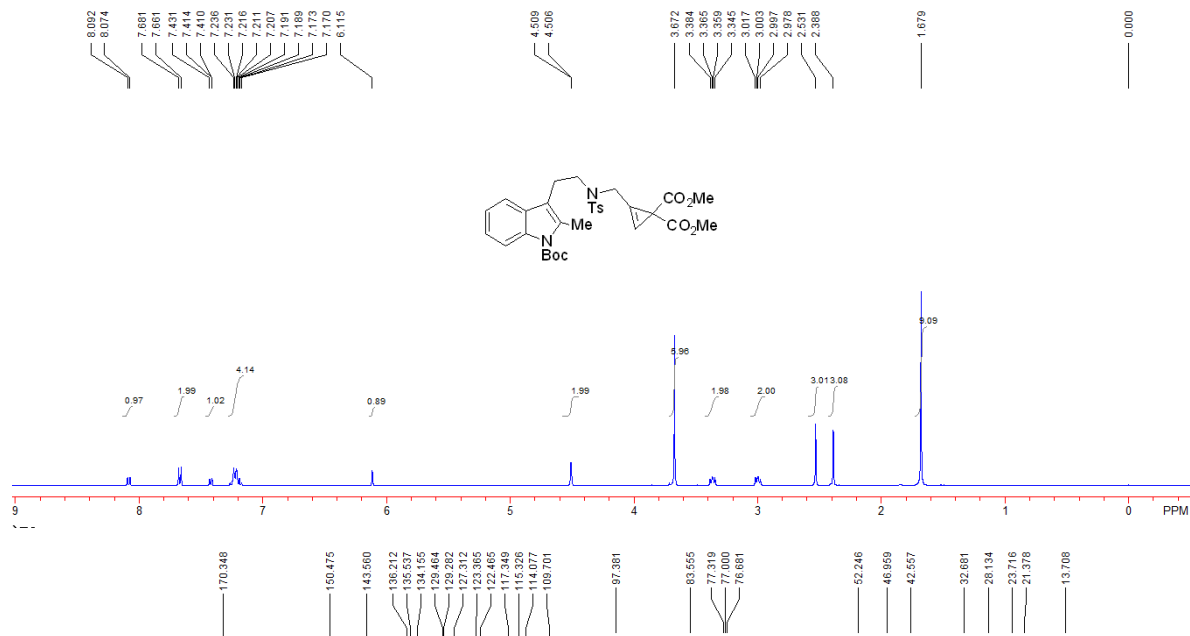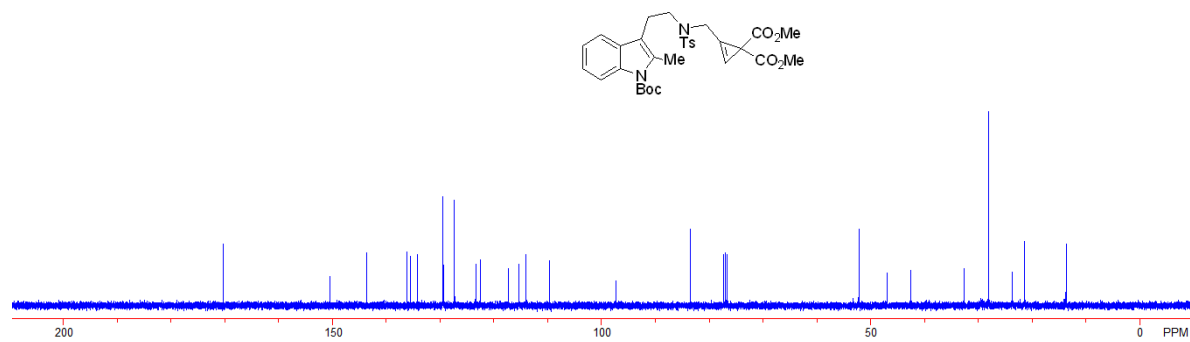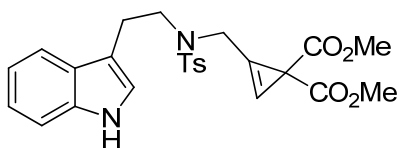

Compound **1a'**: 1.05 g, 81% yield; a colorless oil; IR (neat)  $\nu$  3398, 2953, 2924, 2853, 1735, 1457, 1435, 1339, 1288, 1265, 1067, 735, 654  $\text{cm}^{-1}$ ;  $^1\text{H}$  NMR ( $\text{CDCl}_3$ , 400 MHz, TMS)  $\delta$  2.40 (3H, s), 3.03–3.07 (2H, m), 3.51–3.55 (2H, m), 3.68 (6H, s), 4.47 (2H, d,  $J = 1.2$  Hz), 6.02 (1H, s), 7.05 (1H, d,  $J = 2.4$  Hz), 7.07–7.11 (1H, m), 7.16–7.19 (1H, m), 7.24 (2H, d,  $J = 8.4$  Hz), 7.35 (1H, d,  $J = 8.0$  Hz), 7.54 (1H, d,  $J = 8.0$  Hz), 7.69 (2H, d,  $J = 8.4$  Hz), 8.22 (1H, s);  $^{13}\text{C}$  NMR ( $\text{CDCl}_3$ , 100 MHz, TMS)  $\delta$  21.5, 24.4, 32.7, 42.2, 47.7, 52.3, 97.4, 109.6,

111.2, 111.8, 118.4, 119.3, 122.0, 122.3, 127.1, 127.4, 129.6, 136.1, 136.3, 143.6, 170.5; HRMS (ESI) Calcd. for C<sub>25</sub>H<sub>26</sub>N<sub>2</sub>O<sub>6</sub>S: 482.1512, found: 482.1521.

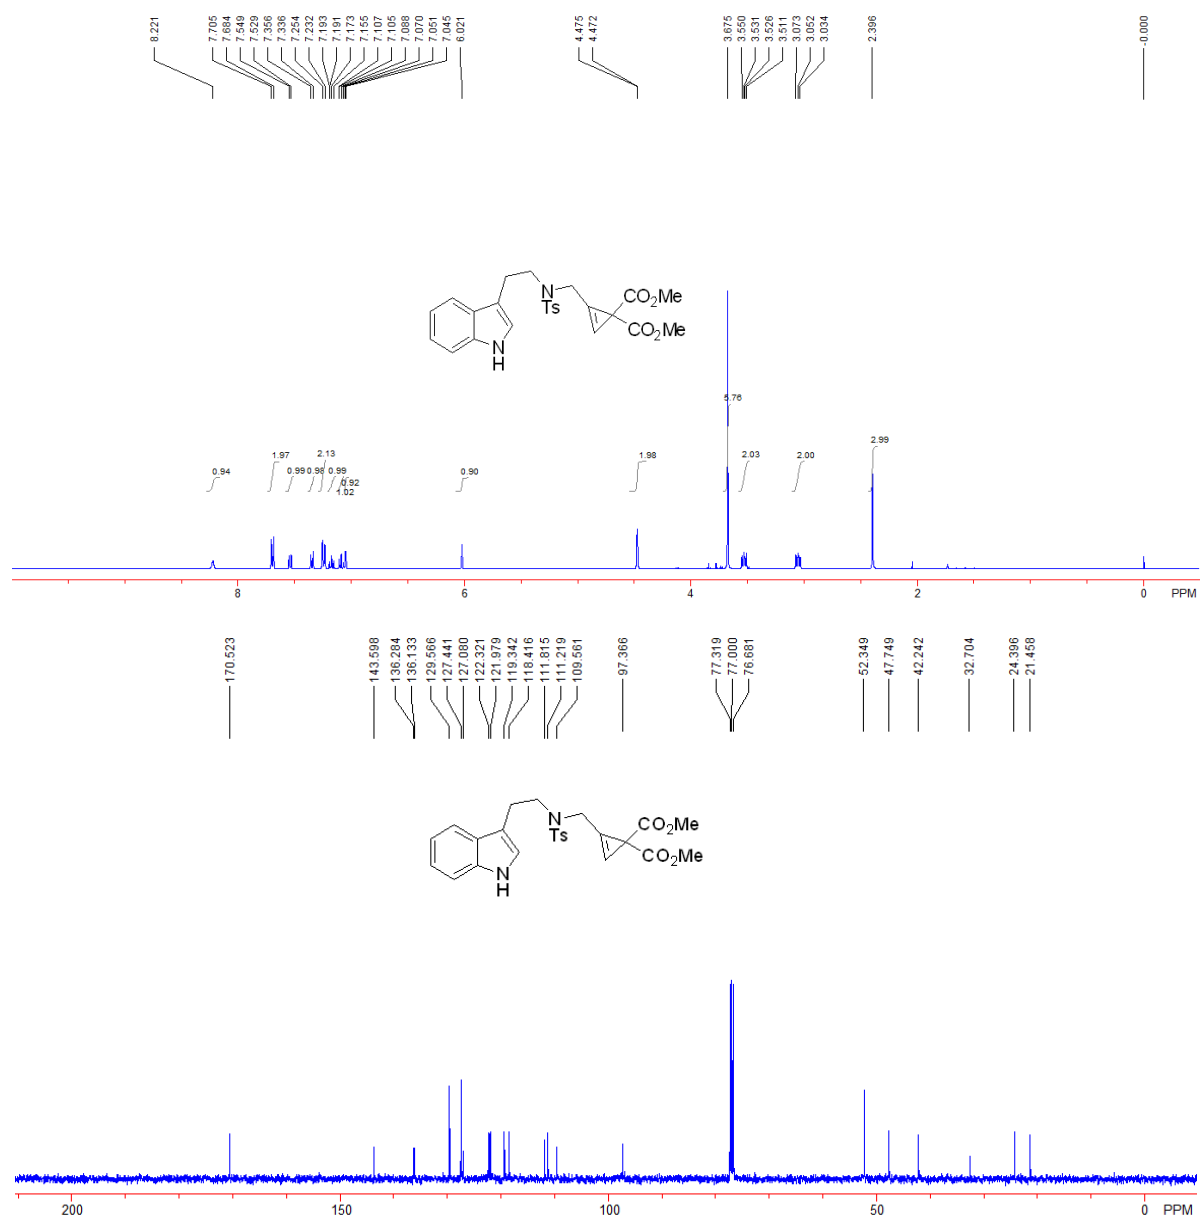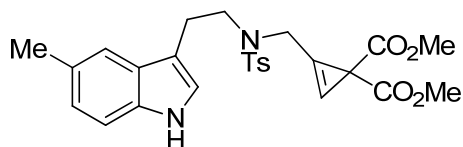

Compound **1b'**: 920 mg, 57% yield; a colorless oil; IR (neat)  $\nu$  3395, 2949, 2916, 2857, 1733, 1596, 1435, 1340, 1288, 1159, 1093, 1067, 915, 813, 736, 662 cm<sup>-1</sup>; <sup>1</sup>H NMR (CDCl<sub>3</sub>, 400 MHz, TMS)  $\delta$  2.41 (3H, s), 2.44 (3H, s), 3.01–3.05 (2H, m), 3.50–3.54 (2H, m), 3.68 (6H, s), 4.49 (2H, d,  $J$  = 1.6 Hz), 6.03 (1H, t,  $J$  = 1.6 Hz), 7.00–7.04 (2H, m), 7.23–7.27 (3H, m), 7.33 (1H, s), 7.70 (2H, d,  $J$  = 8.0 Hz), 7.93 (1H, m); <sup>13</sup>C NMR (CDCl<sub>3</sub>,

100 MHz, TMS)  $\delta$  21.4, 21.5, 24.3, 32.7, 42.2, 47.8, 52.4, 97.4, 109.6, 110.9, 111.4, 118.1, 122.4, 123.7, 127.4, 127.5, 128.6, 129.6, 134.4, 136.3, 143.6, 170.6; HRMS (ESI) Calcd. for  $C_{28}H_{32}N_2O_6S$ : 524.1981, found: 524.1989.

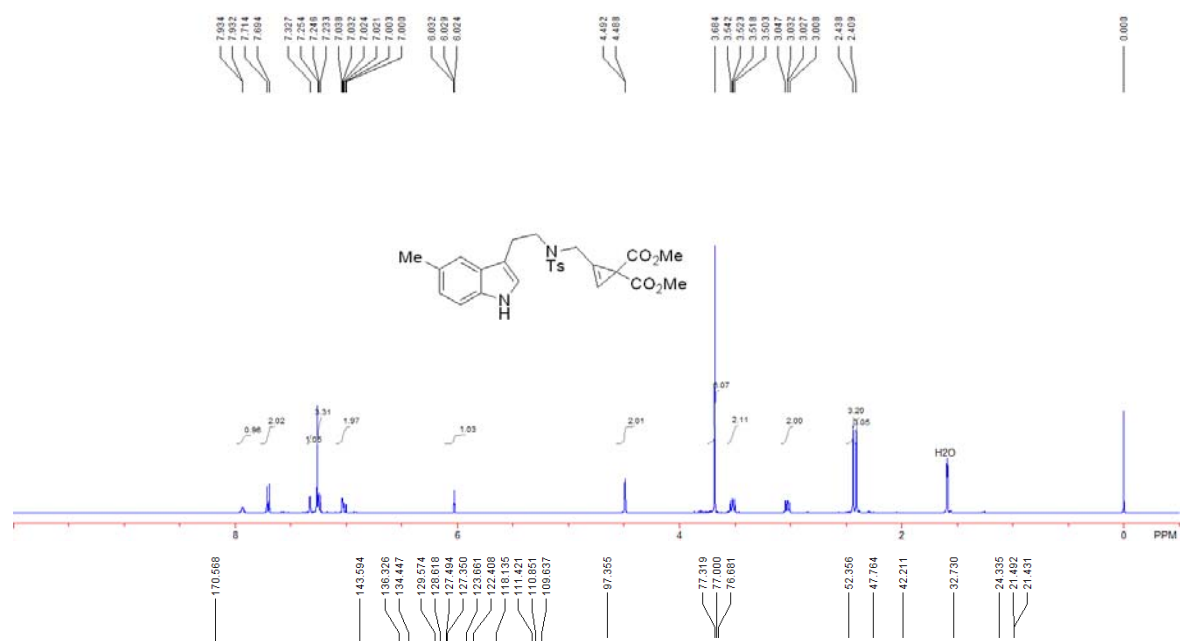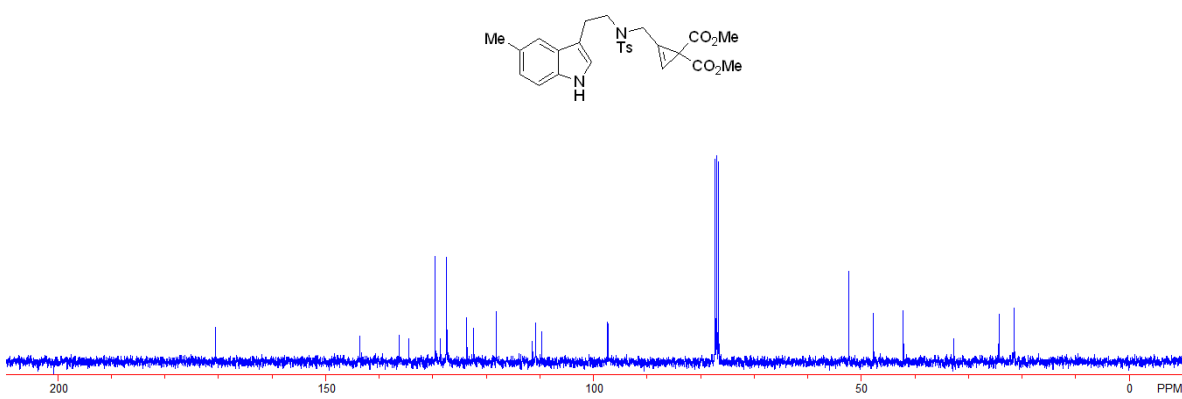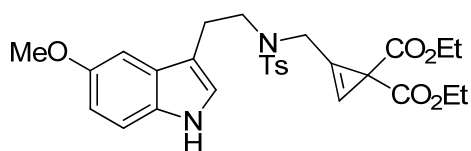

Compound **1d'**: 46mg, 15% yield; a colorless oil; IR (neat)  $\nu$  2961, 2928, 2856, 2364, 1734, 1260, 1159, 1093, 1018, 799  $cm^{-1}$ ;  $^1H$  NMR ( $CDCl_3$ , 400 MHz, TMS)  $\delta$  1.24 (6H, t,  $J = 7.2$  Hz), 2.39 (3H, s), 3.02–3.06 (2H, m), 3.50–3.54 (2H, m), 3.85 (3H, s), 4.14 (4H, q,  $J = 7.2$  Hz), 4.49 (2H, d,  $J = 1.6$  Hz), 6.00 (1H, t,  $J = 1.6$  Hz), 6.83 (1H, dd,  $J = 2.4, 8.8$  Hz), 7.02 (1H, d,  $J = 2.4$  Hz), 7.06 (1H, d,  $J = 2.4$  Hz), 7.22–7.25 (3H, m), 7.70 (2H, d,  $J = 8.4$  Hz), 8.14 (1H, m);  $^{13}C$  NMR ( $CDCl_3$ , 100 MHz, TMS)  $\delta$  14.1, 21.4, 24.5, 33.0, 42.3, 47.7, 55.7, 61.2,



97.4, 100.2, 109.8, 111.6, 111.9, 112.3, 123.0, 131.2, 136.3, 143.6, 153.9, 170.2; HRMS (ESI) Calcd. for  $C_{28}H_{32}N_2O_7S$ : 540.1930, found: 540.1919.

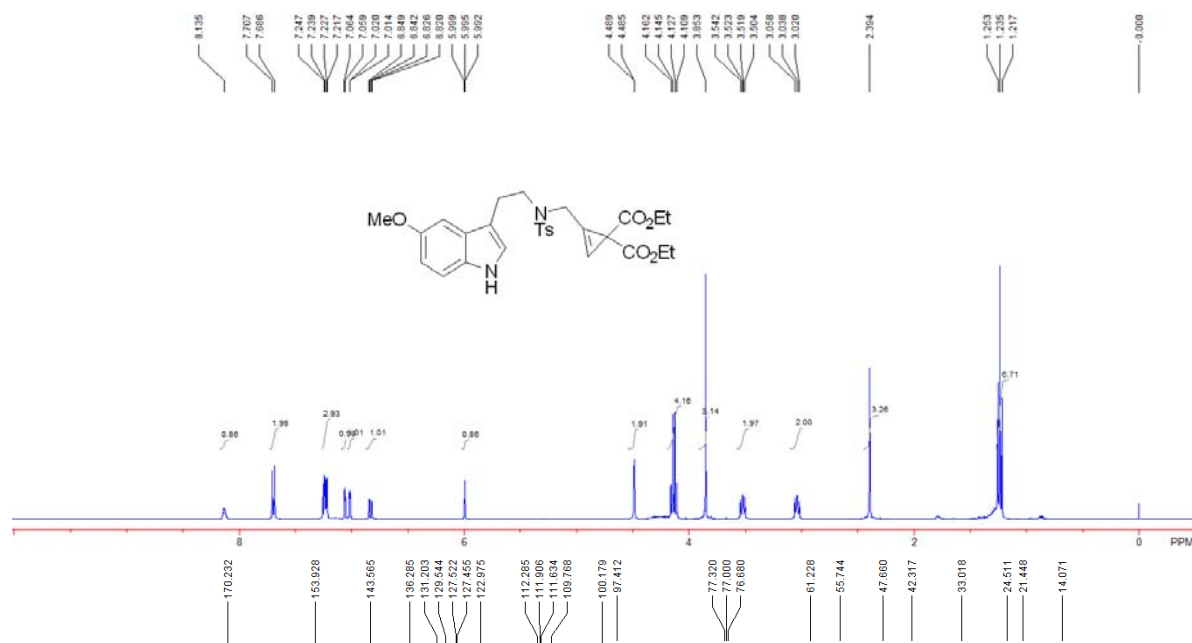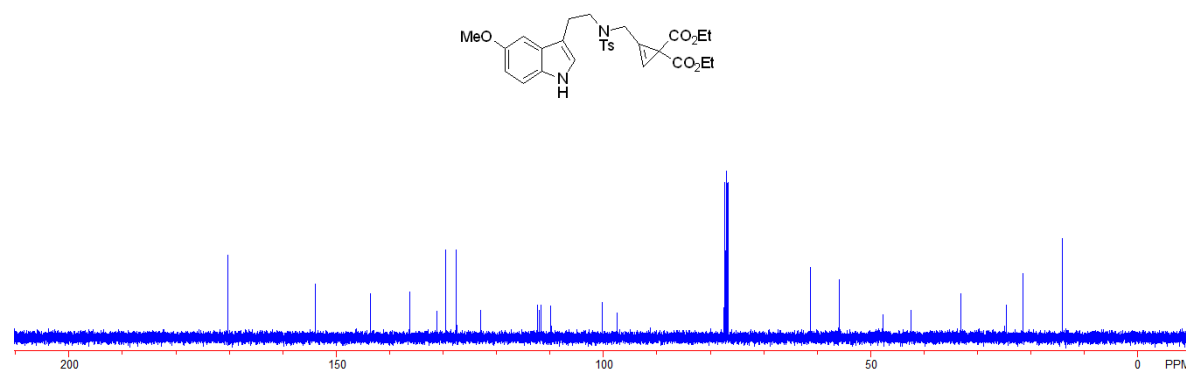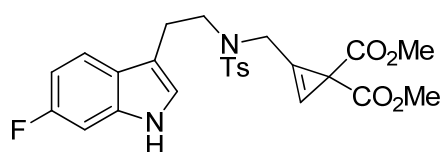

Compound **1g'**: 832 mg, 84% yield; a colorless oil; IR (neat)  $\nu$  3377, 3146, 2953, 2925, 1736, 1628, 1456, 1436, 1343, 1290, 1254, 1158, 1095, 1068, 951, 812  $cm^{-1}$ ;  $^1H$  NMR ( $CDCl_3$ , 400 MHz, TMS)  $\delta$  2.34 (3H, s), 2.99–3.03 (2H, m), 3.51–3.54 (2H, m), 3.65 (6H, s), 4.48 (2H, s), 6.13 (1H, s), 6.79–6.84 (1H, m), 7.01–7.06 (2H, m), 7.20 (2H, d,  $J = 8.0$  Hz), 7.41 (1H, dd,  $J = 5.2, 8.4$  Hz), 7.67 (2H, d,  $J = 8.0$  Hz), 8.98 (1H, m);  $^{13}C$  NMR ( $CDCl_3$ , 100 MHz, TMS)  $\delta$  21.3, 24.3, 32.7, 42.1, 47.7, 52.3, 97.4 (d,  $J = 4.1$  Hz), 97.6, 107.9 (d,  $J = 24.6$  Hz), 109.5, 111.7, 119.0 (d,  $J = 10.0$  Hz), 122.6 (d,  $J = 3.4$  Hz), 123.7, 127.3, 129.5, 136.0 (d,  $J = 12.6$  Hz),

143.7, 159.8 (d,  $J = 235.7$  Hz), 170.5;  $^{19}\text{F}$  NMR (376 MHz,  $\text{CDCl}_3$ ,  $\text{CFCl}_3$ ): -121.61– -121.55 (m); HRMS (ESI)

Calcd. for  $\text{C}_{25}\text{H}_{25}\text{FN}_2\text{O}_6\text{S}$ : 500.1417, found: 500.1429.

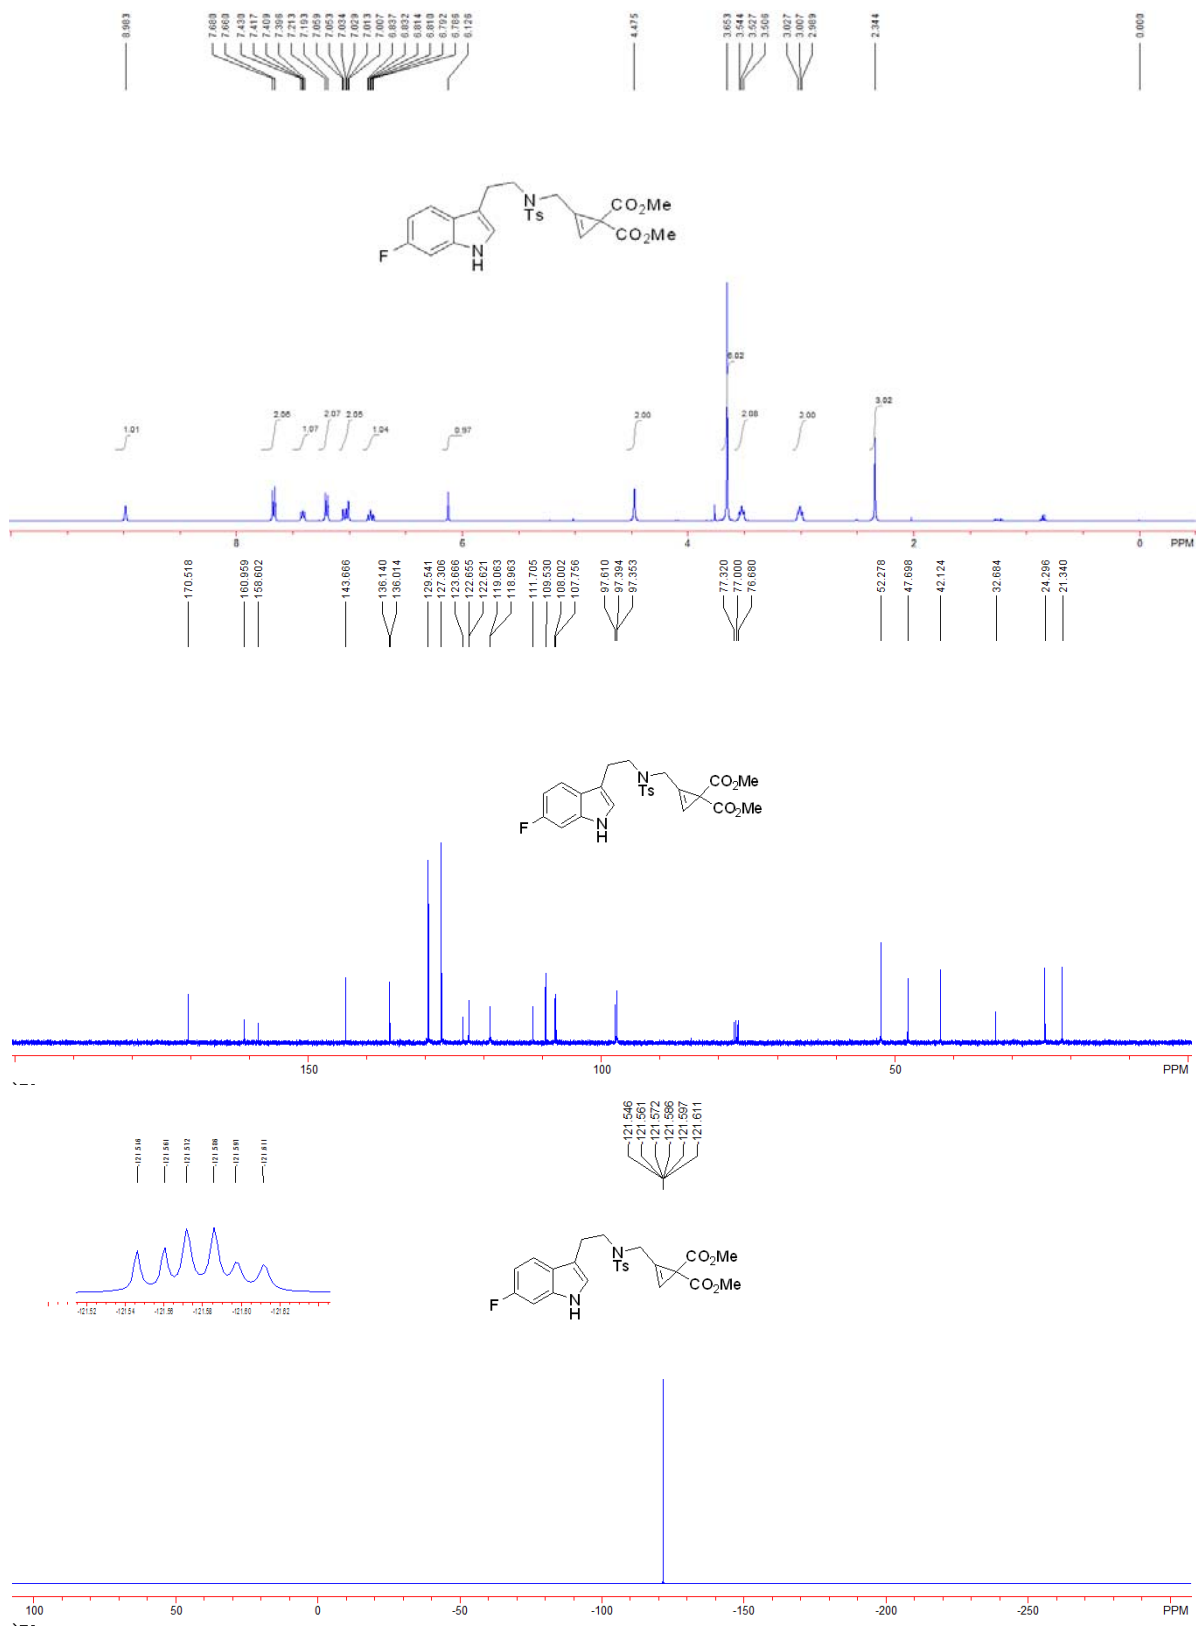

## General Procedure and Spectroscopic Data of the Products 2

A solution of compound **1** (0.1 mmol) was stirred at ambient temperature in the mixed solvent of TFA and DCM (1:1). The reaction was monitored by TLC. When the deprotected compound was observed, then 1.5 eq of HOTf was added into the reaction system. Once the reaction was complete, the solvent was removed under reduced pressure and the residue was chromatographed on silica gel (elution with petroleum ether/ethyl acetate = 3/1) to provide the corresponding product **2**.

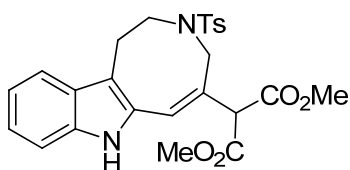

Compound **2a**: 36 mg, 62% yield; a white solid; mp. 75–77 °C; IR (neat)  $\nu$  3374, 2954, 2924, 2854, 1734, 1457, 1436, 1334, 1157, 1093, 740  $\text{cm}^{-1}$ ;  $^1\text{H}$  NMR ( $\text{CDCl}_3$ , 400 MHz, TMS)  $\delta$  2.36 (3H, s), 2.90–2.92 (2H, m), 3.45 (2H, t,  $J = 4.8$  Hz), 3.84 (6H, s), 3.90 (2H, s), 4.70 (1H, s), 6.69 (1H, s), 7.05–7.09 (1H, m), 7.14–7.19 (3H, m), 7.25 (1H, d,  $J = 8.4$  Hz), 7.40 (1H, d,  $J = 7.6$  Hz), 7.56 (2H, d,  $J = 8.4$  Hz), 7.90 (1H, s);  $^{13}\text{C}$  NMR ( $\text{CDCl}_3$ , 100 MHz, TMS)  $\delta$  21.4, 23.9, 29.7, 45.5, 48.7, 53.0, 56.4, 110.8, 113.1, 118.2, 119.6, 122.9, 123.9, 126.9, 127.7, 129.6, 131.1, 131.2, 135.8, 136.1, 143.2, 168.4; HRMS (ESI) Calcd. for  $\text{C}_{25}\text{H}_{26}\text{N}_2\text{O}_6\text{S}$ : 482.1512, found: 482.1525.

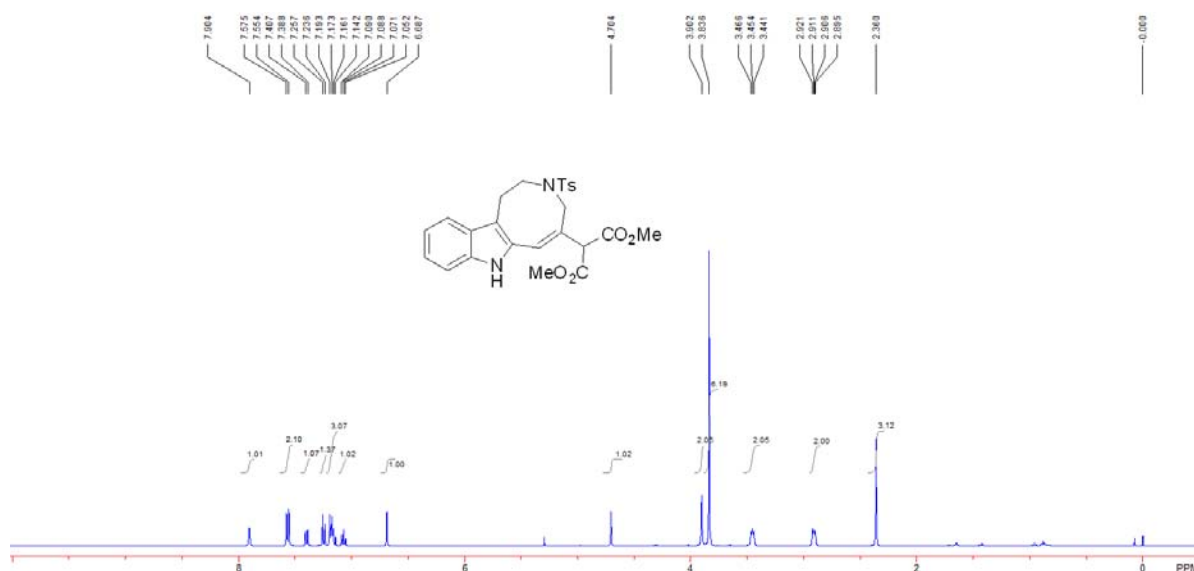

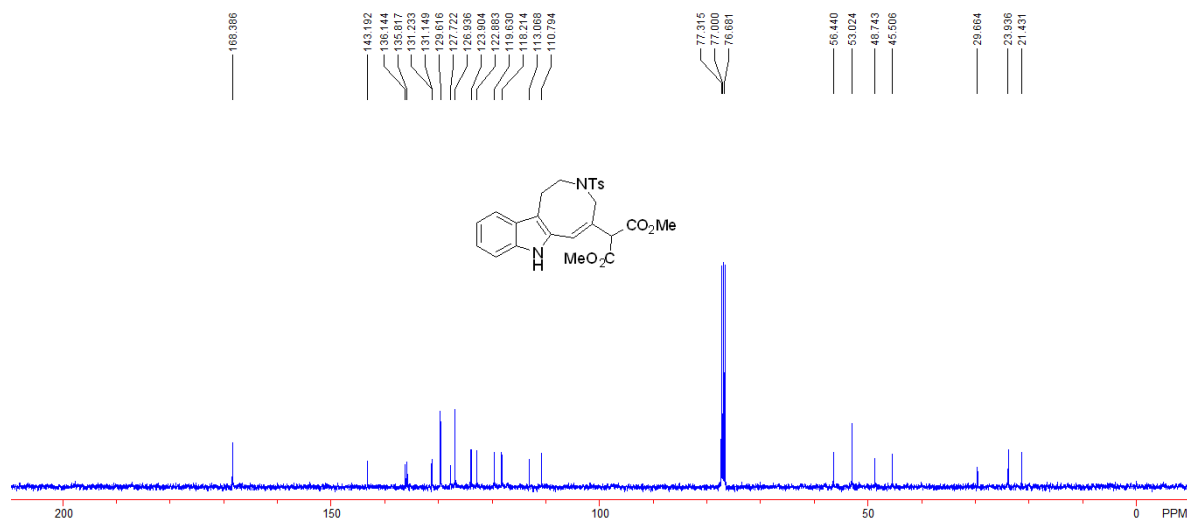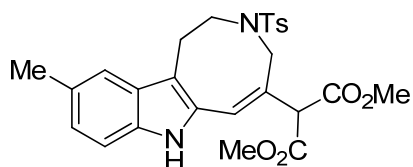

Compound **2b**: 35 mg, 81% yield; a white solid; mp. 75–77 °C; IR (neat)  $\nu$  3384, 2955, 2923, 2854, 1737, 1457, 1328, 1260, 1156, 1092, 1018, 800  $\text{cm}^{-1}$ ;  $^1\text{H}$  NMR ( $\text{CDCl}_3$ , 400 MHz, TMS)  $\delta$  2.36 (3H, s), 2.41 (3H, s), 2.88 (2H, t,  $J = 4.8$  Hz), 3.43 (2H, t,  $J = 4.8$  Hz), 3.83 (6H, s), 3.88 (2H, s), 4.70 (1H, s), 6.67 (1H, s), 6.98 (1H, d,  $J = 8.4$  Hz), 7.13 (1H, d,  $J = 8.0$  Hz), 7.19 (3H, d,  $J = 8.0$  Hz), 7.56 (2H, d,  $J = 8.4$  Hz), 7.83 (1H, s);  $^{13}\text{C}$  NMR ( $\text{CDCl}_3$ , 100 MHz, TMS)  $\delta$  21.41, 21.43, 23.9, 29.6, 45.5, 48.8, 53.0, 56.4, 110.5, 112.6, 117.8, 124.1, 124.5, 126.9, 127.9, 128.9, 129.6, 130.9, 131.3, 134.5, 135.8, 143.2, 168.4; HRMS (ESI) Calcd. for  $\text{C}_{26}\text{H}_{29}\text{N}_2\text{O}_6\text{S}$ : 496.1668, found: 496.1667.

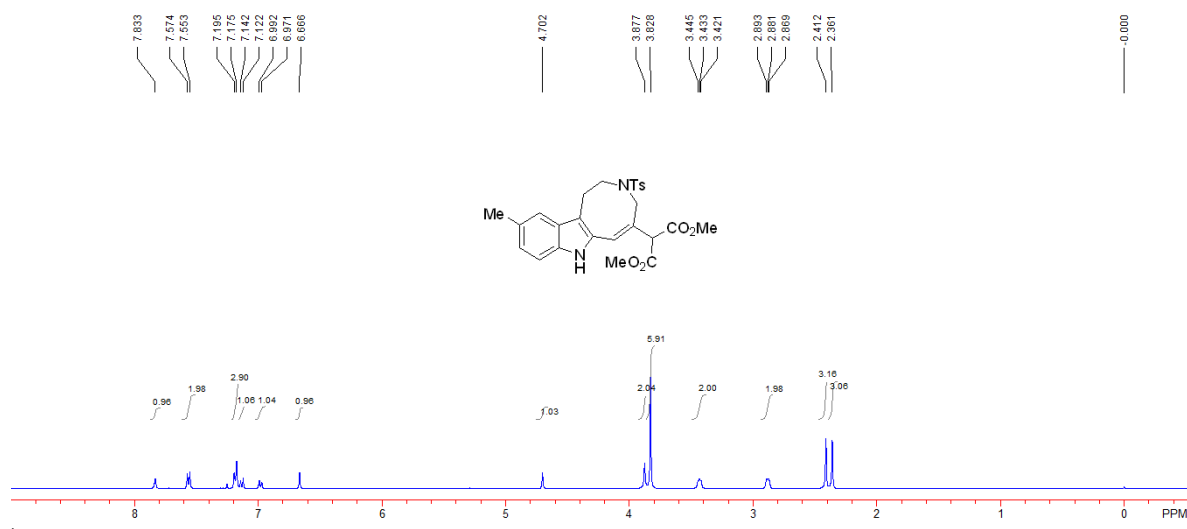

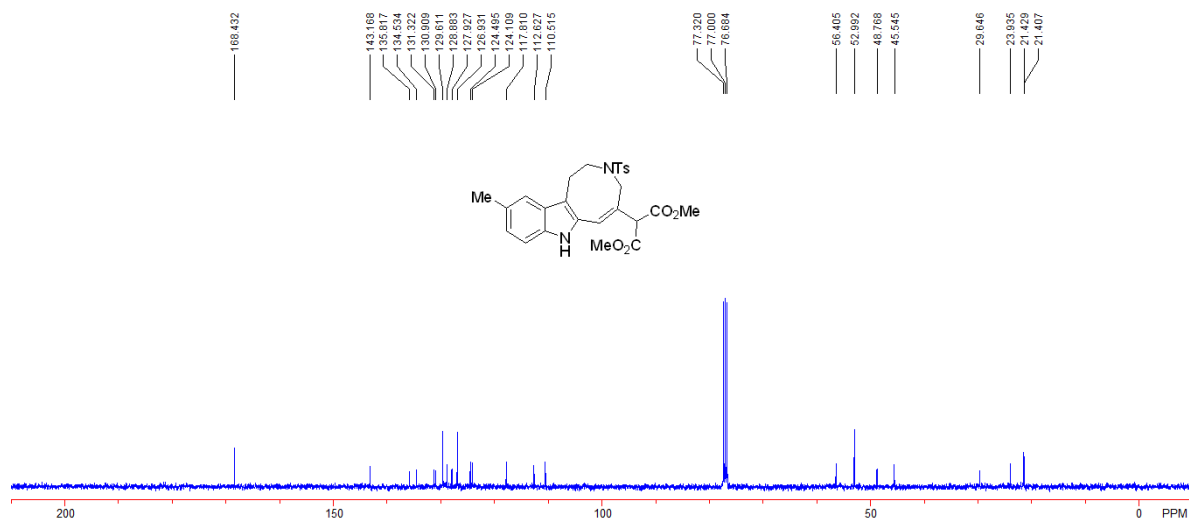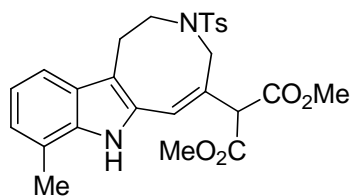

Compound **2c**: 111 mg, 93% yield; a white solid; mp. 75–77 °C; IR (neat)  $\nu$  3380, 2954, 2924, 2854, 1735, 1435, 1333, 1156, 1092, 738  $\text{cm}^{-1}$ ; <sup>1</sup>H NMR (CDCl<sub>3</sub>, 400 MHz, TMS)  $\delta$  2.36 (3H, s), 2.41 (3H, s), 2.90–2.92 (2H, m), 3.46 (2H, t,  $J$  = 5.2 Hz), 3.84 (6H, s), 3.91 (2H, s), 4.70 (1H, d,  $J$  = 0.4 Hz), 6.74 (1H, s), 6.96–7.02 (2H, m), 7.18 (2H, d,  $J$  = 8.0 Hz), 7.25 (1H, d,  $J$  = 5.6 Hz), 7.56 (2H, d,  $J$  = 8.0 Hz), 7.84 (1H, s); <sup>13</sup>C NMR (CDCl<sub>3</sub>, 100 MHz, TMS)  $\delta$  16.4, 21.4, 24.1, 29.7, 45.5, 48.8, 53.0, 56.4, 113.7, 116.0, 119.9, 120.0, 123.4, 124.0, 127.0, 127.3, 129.6, 130.9, 131.2, 135.7, 135.9, 143.1, 168.4; HRMS (ESI) Calcd. for C<sub>26</sub>H<sub>28</sub>N<sub>2</sub>O<sub>6</sub>S: 496.1668, found: 496.1680.

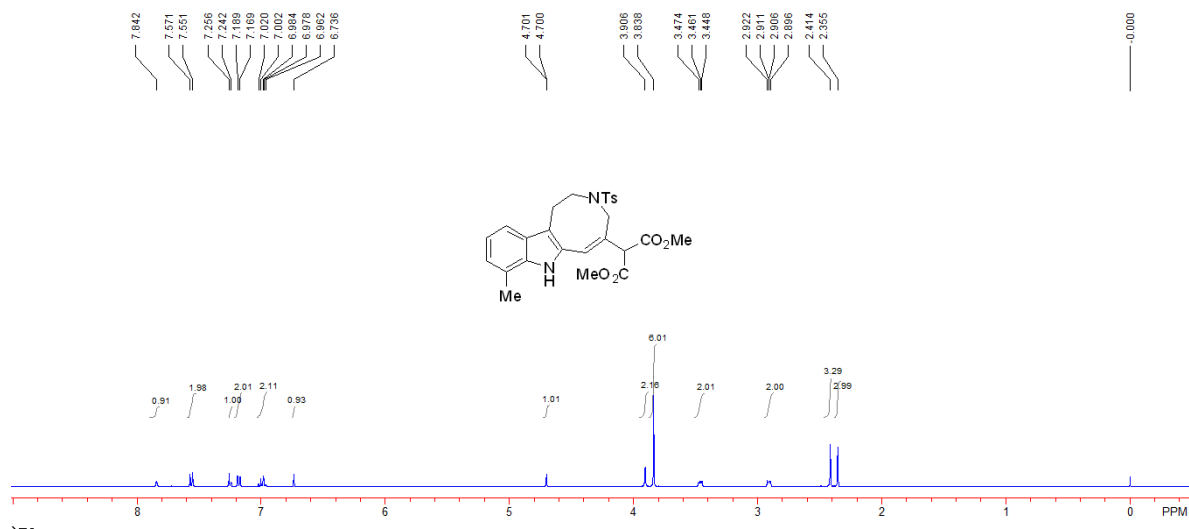

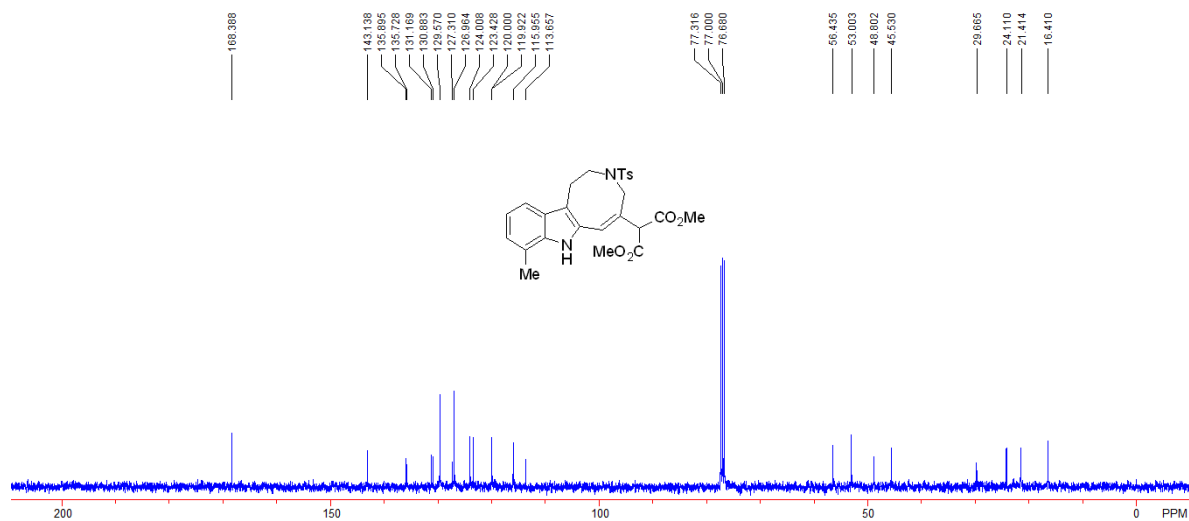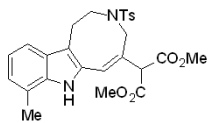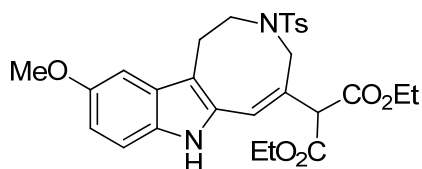

Compound **2d**: 36 mg, 67% yield; a white solid; mp. 55–57 °C; IR (neat)  $\nu$  3388, 2958, 2925, 2853, 1731, 1455, 1305, 1217, 1155, 1029, 656  $\text{cm}^{-1}$ ;  $^1\text{H}$  NMR ( $\text{CDCl}_3$ , 400 MHz, TMS)  $\delta$  1.33 (6H, t,  $J = 7.2$  Hz), 2.36 (3H, s), 2.87–2.89 (2H, m), 3.46 (2H, t,  $J = 5.2$  Hz), 3.83 (3H, s), 3.92 (2H, s), 4.26–4.32 (4H, m), 4.64 (1H, s), 6.66 (1H, s), 6.81–6.83 (2H, m), 7.14 (1H, d,  $J = 9.6$  Hz), 7.18 (2H, d,  $J = 8.0$  Hz), 7.56 (2H, d,  $J = 8.0$  Hz), 7.84 (1H, s);  $^{13}\text{C}$  NMR ( $\text{CDCl}_3$ , 100 MHz, TMS)  $\delta$  14.0, 21.4, 24.0, 45.6, 48.8, 55.8, 56.9, 62.0, 99.9, 111.6, 112.6, 112.9, 123.7, 126.9, 128.1, 129.6, 131.2, 131.4, 132.1, 135.9, 143.1, 154.1, 168.0; HRMS (ESI) Calcd. for  $\text{C}_{28}\text{H}_{32}\text{N}_2\text{O}_7\text{S}$ : 540.1930, found: 540.1937.

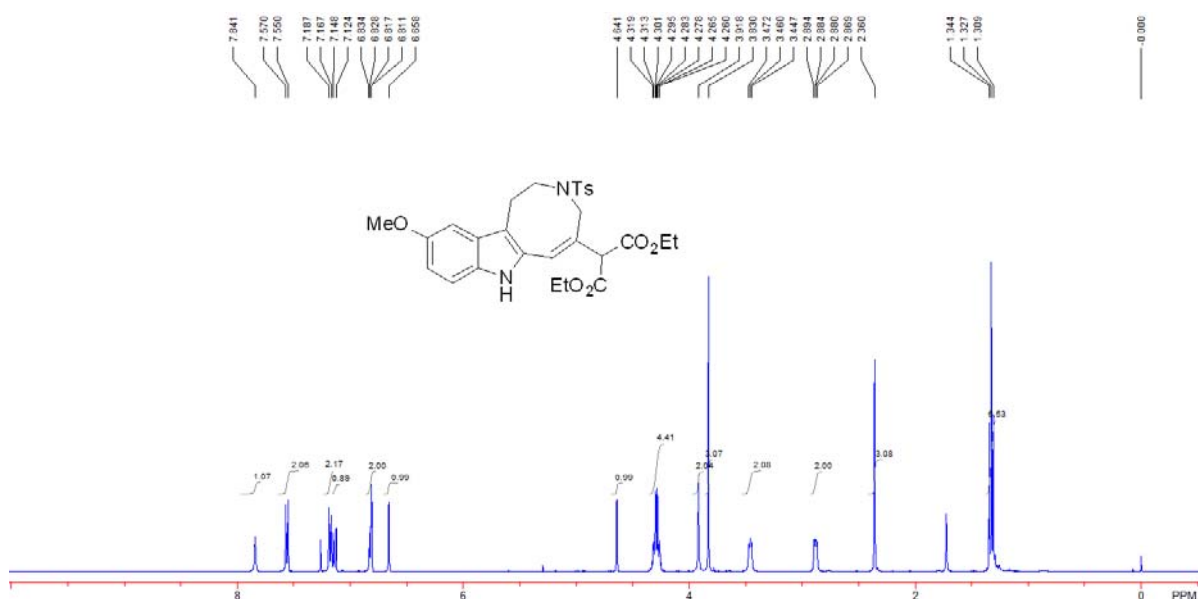

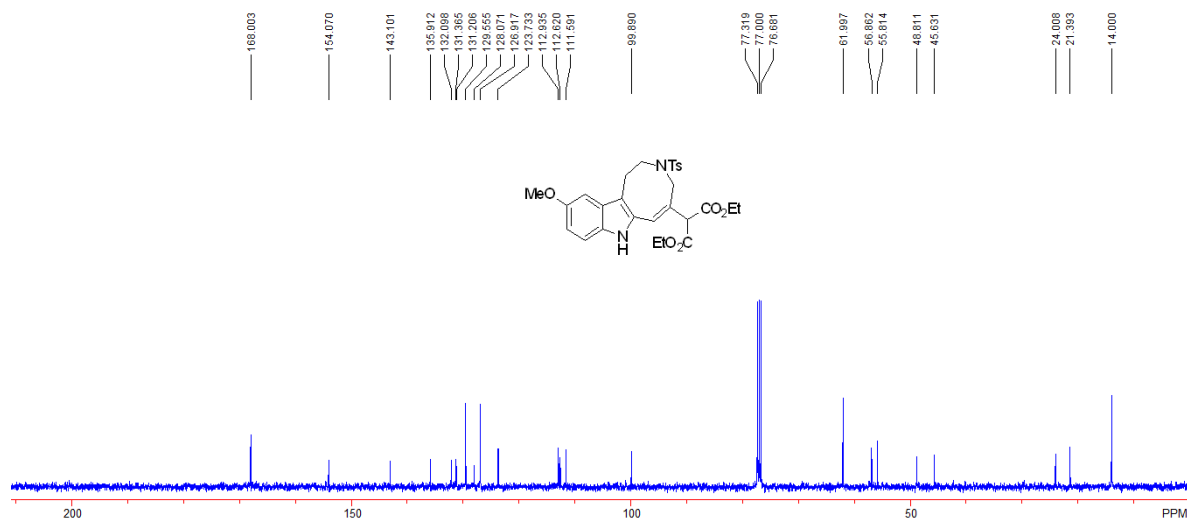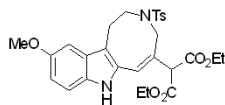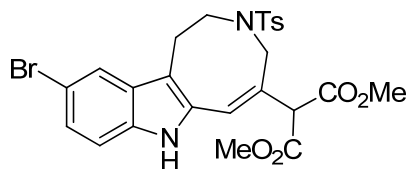

Compound **2e**: 35 mg, 62% yield; a white solid; mp. 74–76 °C; IR (neat)  $\nu$  3366, 2955, 2925, 2855, 1738, 1435, 1325, 1325, 1260, 1157, 1092, 1019, 812, 796, 657  $\text{cm}^{-1}$ ;  $^1\text{H}$  NMR ( $\text{CDCl}_3$ , 400 MHz, TMS)  $\delta$  2.37 (3H, s), 2.84–2.87 (2H, m), 3.43 (2H, t,  $J = 5.2$  Hz), 3.83 (6H, s), 3.92 (2H, s), 4.68 (1H, s), 6.65 (1H, s), 7.11 (1H, d,  $J = 8.8$  Hz), 7.17–7.22 (3H, m), 7.50 (1H, d,  $J = 2.0$  Hz), 7.54 (2H, d,  $J = 8.4$  Hz), 8.12 (1H, s);  $^{13}\text{C}$  NMR ( $\text{CDCl}_3$ , 100 MHz, TMS)  $\delta$  21.4, 23.8, 45.9, 48.7, 53.1, 56.7, 112.2, 112.3, 112.8, 120.8, 123.4, 125.5, 126.9, 129.4, 129.7, 131.9, 132.4, 134.7, 135.7, 143.3, 168.3; HRMS (ESI) Calcd. for  $\text{C}_{25}\text{H}_{25}\text{BrN}_2\text{O}_6\text{S}$ : 560.0617, found: 560.0602.

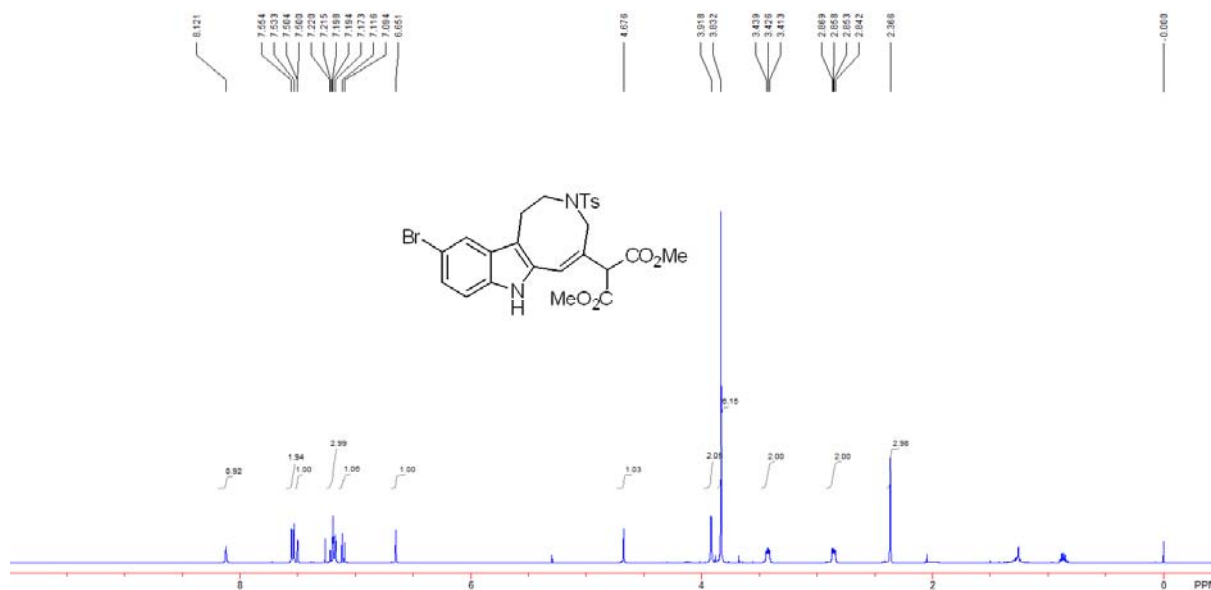

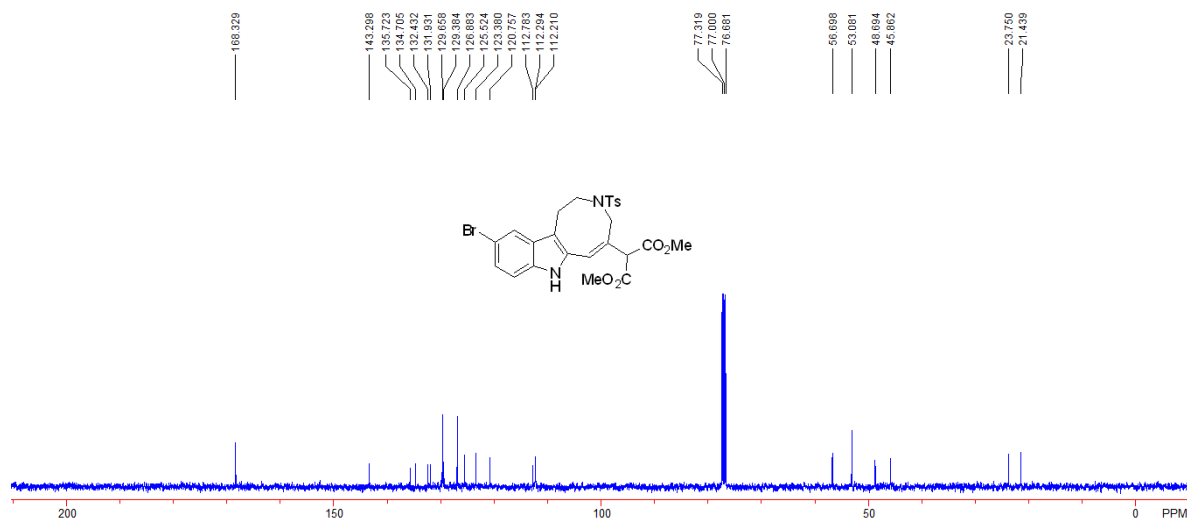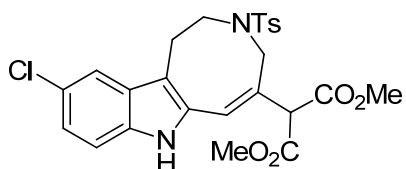

Compound **2f**: 33 mg, 67% yield; a white solid; mp. 80–82 °C; IR (neat)  $\nu$  3371, 2953, 2924, 2854, 2360, 1736, 1436, 1326, 1156, 1092, 1031, 661  $\text{cm}^{-1}$ ;  $^1\text{H}$  NMR ( $\text{CDCl}_3$ , 400 MHz, TMS)  $\delta$  2.37 (3H, s), 2.85–2.87 (2H, m), 3.43 (2H, t,  $J = 5.2$  Hz), 3.83 (6H, s), 3.92 (2H, s), 4.67 (1H, d,  $J = 0.8$  Hz), 6.65 (1H, s), 7.07–7.09 (1H, m), 7.14–7.16 (1H, m), 7.18 (2H, d,  $J = 8.0$  Hz), 7.34 (1H, d,  $J = 2.0$  Hz), 7.55 (2H, d,  $J = 8.0$  Hz), 8.10 (1H, s);  $^{13}\text{C}$  NMR ( $\text{CDCl}_3$ , 100 MHz, TMS)  $\delta$  21.4, 23.8, 45.9, 48.7, 53.1, 56.7, 111.9, 112.3, 117.7, 123.0, 123.4, 125.3, 126.9, 128.7, 129.7, 131.9, 132.6, 134.4, 135.7, 143.3, 168.3; HRMS (ESI) Calcd. for  $\text{C}_{25}\text{H}_{25}\text{ClN}_2\text{O}_6\text{S}$ : 516.1122, found: 516.1141.

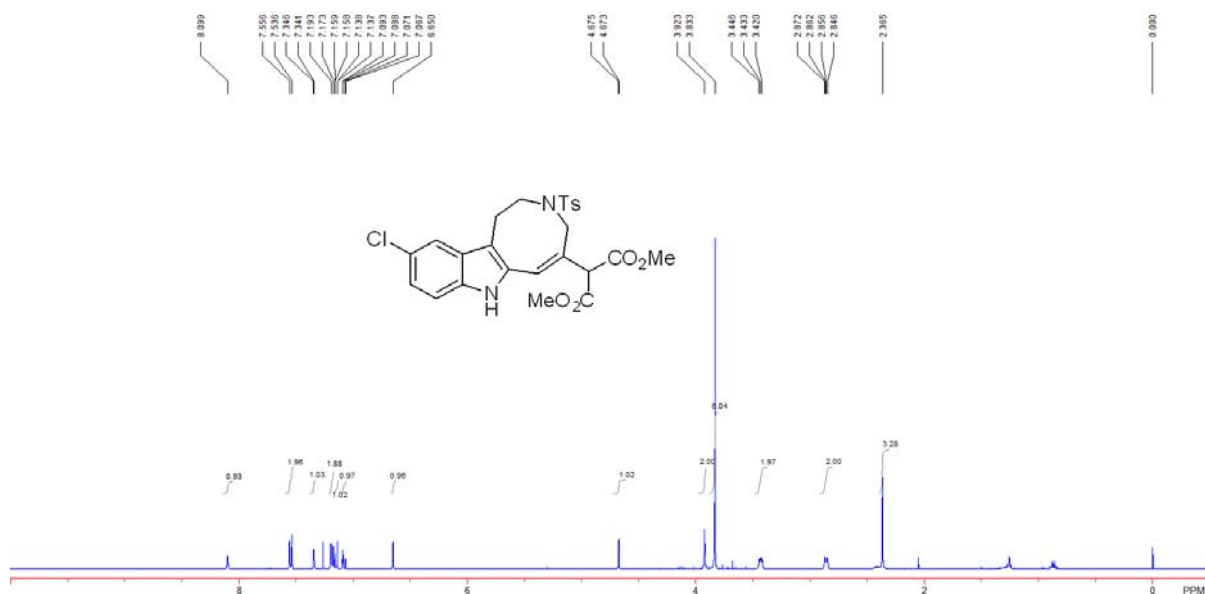





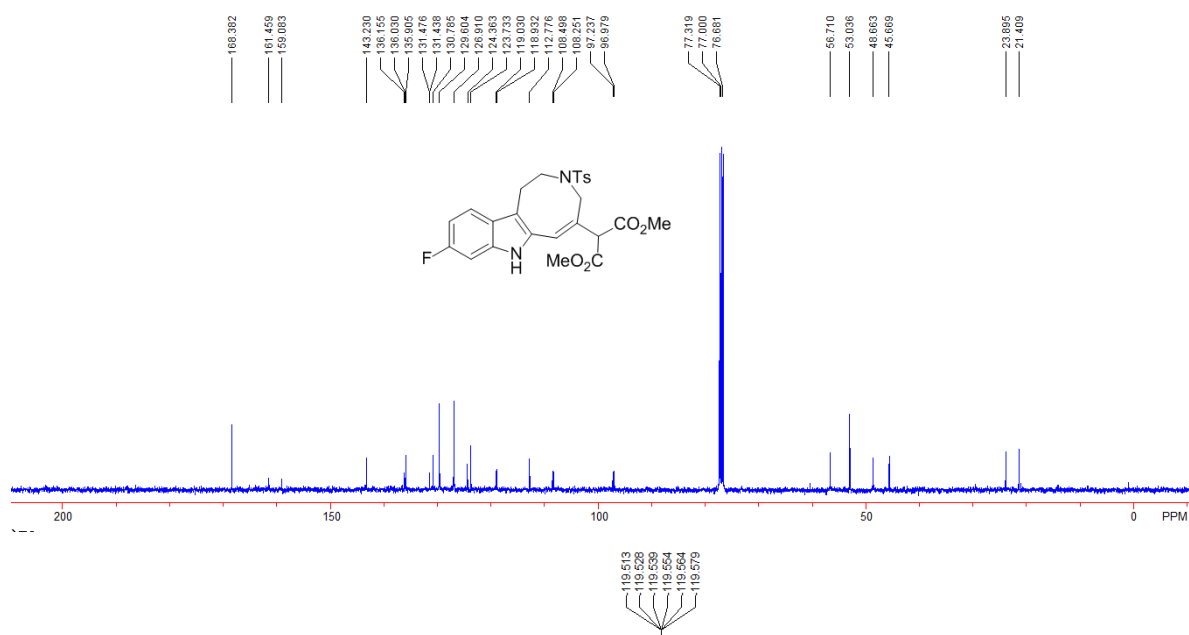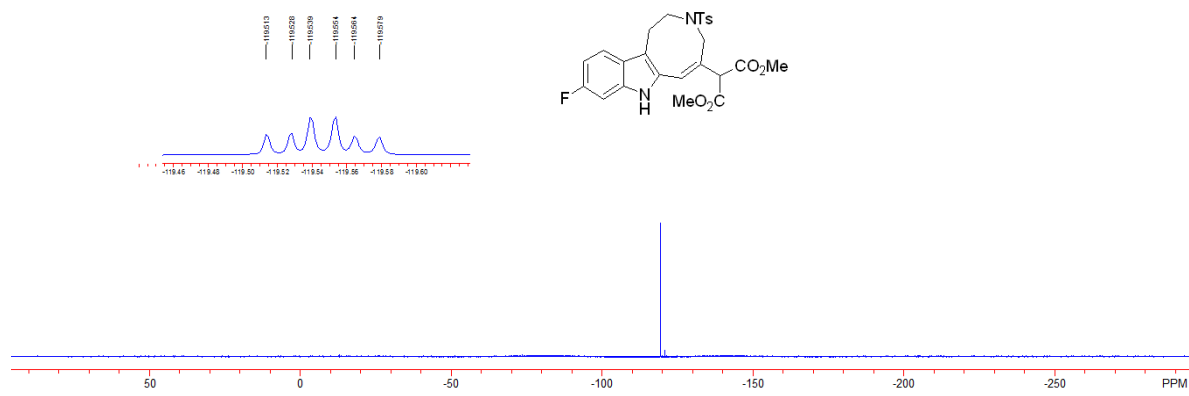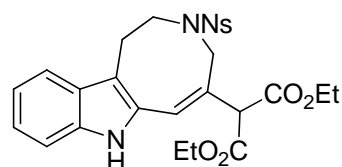

Compound **2i**: 45 mg, 71% yield; a yellow solid; mp. 72–74 °C; IR (neat)  $\nu$  3384, 2955, 2925, 2870, 2853, 1729, 1529, 1459, 1347, 1310, 1159, 1031, 741  $\text{cm}^{-1}$ ;  $^1\text{H}$  NMR ( $\text{CDCl}_3$ , 400 MHz, TMS)  $\delta$  1.35 (6H, t,  $J = 7.2$  Hz), 2.97 (2H, t,  $J = 5.6$  Hz), 3.65 (2H, t,  $J = 5.6$  Hz), 4.27–4.35 (6H, m), 4.36 (1H, s), 6.46 (1H, s), 7.05–7.13 (3H, m), 7.35 (1H, d,  $J = 7.6$  Hz), 7.55–7.57 (2H, m), 7.79 (1H, s), 7.89–7.91 (2H, m);  $^{13}\text{C}$  NMR ( $\text{CDCl}_3$ , 100 MHz, TMS)  $\delta$  14.0, 23.3, 48.2, 48.8, 58.5, 62.3, 110.7, 111.3, 117.8, 119.9, 123.0, 123.1, 123.6, 127.0, 127.6, 129.6, 130.8, 135.9, 145.2, 149.2, 167.7; HRMS (ESI) Calcd. for  $\text{C}_{26}\text{H}_{28}\text{N}_3\text{O}_8\text{S}^{1+}$  ( $\text{M}^+ + \text{H}$ ): 542.1592, found: 542.1586.

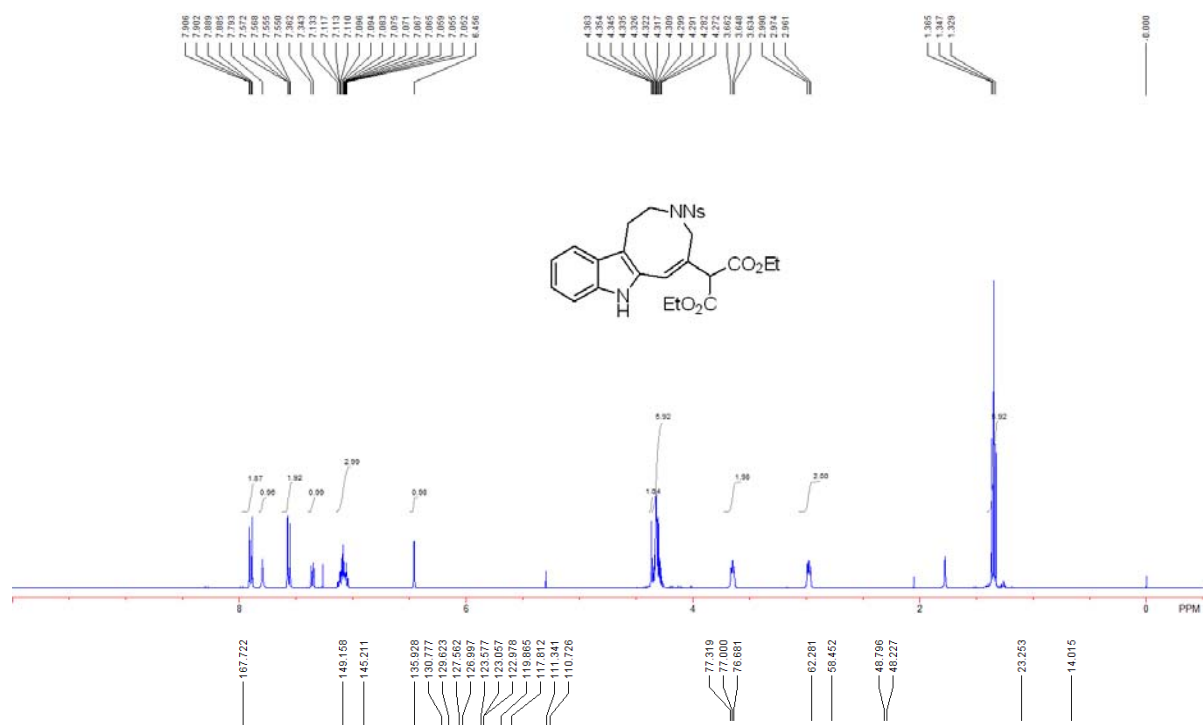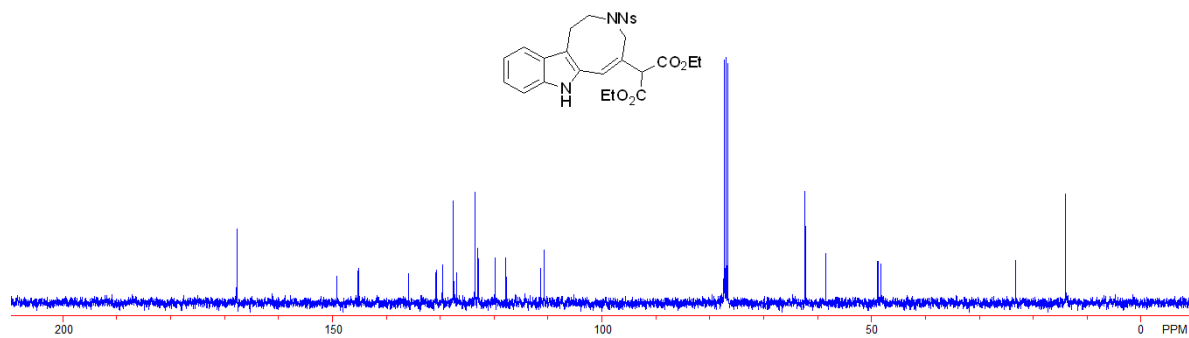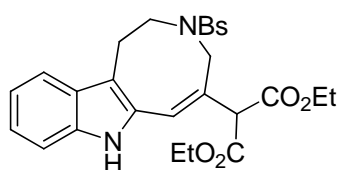

Compound **2j**: 16 mg, 73% yield; a yellow solid; mp. 65–67 °C; IR (neat)  $\nu$  3384, 2961, 2925, 2854, 1728, 1462, 1339, 1259, 1157, 1090, 1068, 1009, 798, 741  $\text{cm}^{-1}$ ;  $^1\text{H}$  NMR ( $\text{CDCl}_3$ , 400 MHz, TMS)  $\delta$  1.34 (6H, t,  $J = 7.2$  Hz), 2.96 (2H, t,  $J = 5.2$  Hz), 3.56 (2H, t,  $J = 5.2$  Hz), 4.10 (2H, s), 4.26–4.34 (4H, m), 4.49 (1H, s), 6.57 (1H, s), 7.07–7.11 (1H, m), 7.16–7.20 (1H, m), 7.25 (1H, d,  $J = 7.2$  Hz), 7.38–7.43 (5H, m), 7.69 (1H, s);  $^{13}\text{C}$  NMR ( $\text{CDCl}_3$ , 100 MHz, TMS)  $\delta$  14.0, 23.7, 46.9, 48.9, 57.6, 62.1, 110.9, 112.4, 118.1, 119.8, 123.0, 123.4, 127.0, 127.4, 128.2, 130.5, 131.1, 132.0, 136.2, 138.6, 167.8; HRMS (ESI) Calcd. for  $\text{C}_{26}\text{H}_{28}\text{BrN}_2\text{O}_6\text{S}^{1+}$  ( $\text{M}^+ + \text{H}$ ): 575.0846, found: 575.0836.

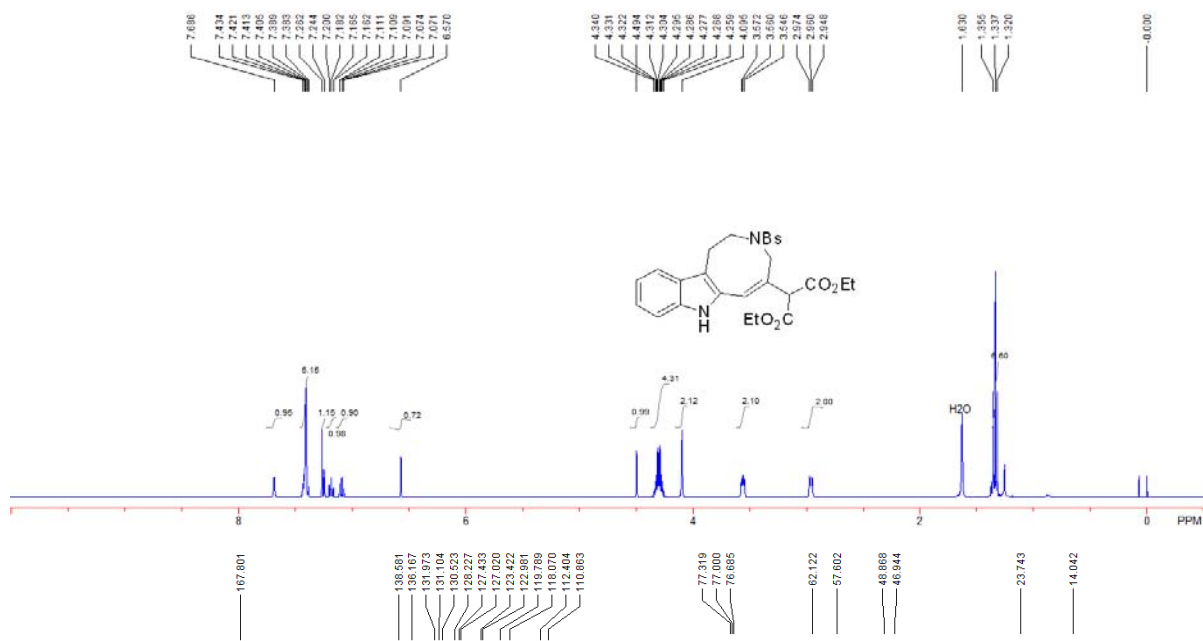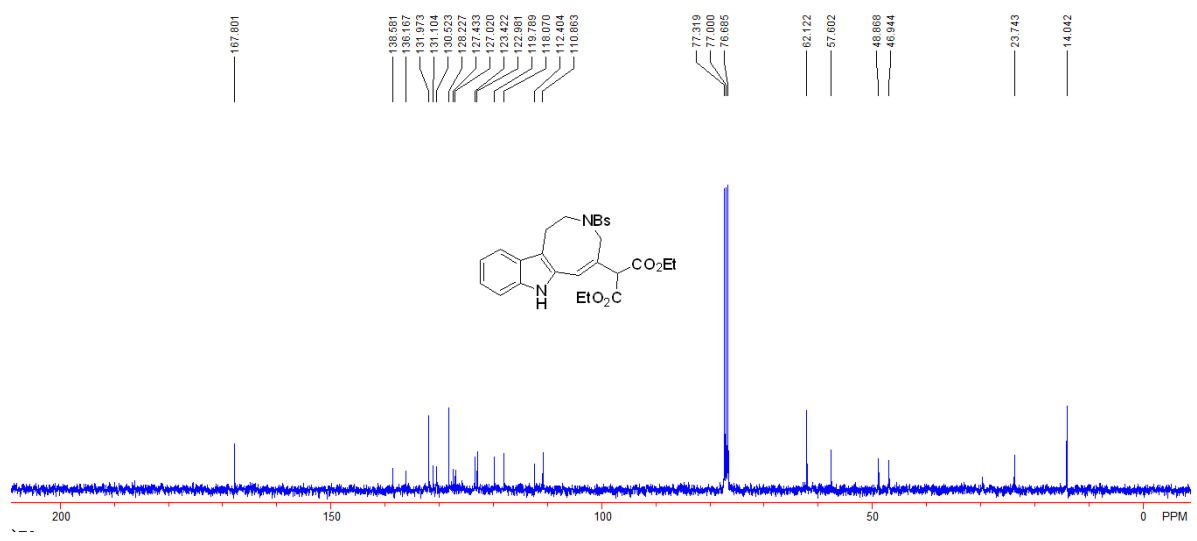

### General procedures and spectroscopic data of compounds 3

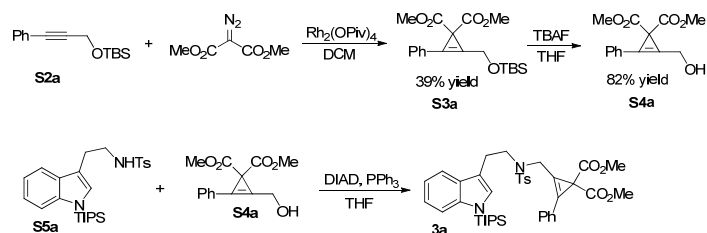

**Typical Procedure for the Preparation of S3a.** A solution of dimethyl diazomalonate (2.77 g, 17.5 mmol) in dry dichloromethane (2 mL) was added via a syringe pump over 3 hrs to a stirred solution of  $\text{Rh}_2(\text{OPiv})_4$  (34 mg, 0.055 mmol) and S2a (2.7 g, 11.0 mmol) in dry dichloromethane (10 mL) at room temperature. After the addition was complete, the reaction mixture was stirred for additional 3 hrs. The solvent was removed under reduced pressure and the residue was purified by silica gel column chromatography.

**Typical Procedure for the Preparation of S4a.** A solution of S3a (1.62 g, 4.3 mmol) in dry THF (10 mL) was added tetrabutylammonium fluoride (1.36 g, 4.3 mmol) at room temperature. The reaction mixture was stirred for 2 hrs. The solvent was removed under reduced pressure and the residue was purified by silica gel column chromatography.

Compound 3a was produced according to the typical Mitsunobu reaction procedure.



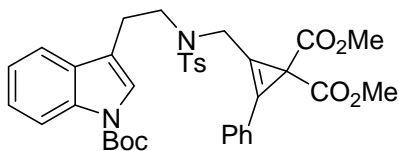

Compound **3a'**: 262 mg, 40% yield; a colorless oil; IR (neat)  $\nu$  2980.6, 2952.1, 2921.3, 2849.4, 1726.6, 1452.6, 1369.4, 1340.8, 1254.5, 1156.0, 1097.6, 1064.6, 762.2, 748.1  $\text{cm}^{-1}$ ; <sup>1</sup>H NMR (CDCl<sub>3</sub>, 400 MHz, TMS)  $\delta$  1.65 (9H, s), 2.29 (3H, s), 3.04 (2H, t, *J* = 7.2 Hz), 3.58–3.62 (2H, m), 3.69 (6H, s), 4.70 (2H, s), 7.13–7.17 (3H, m), 7.21–7.23 (2H, m), 7.26–7.35 (4H, m), 7.38 (1H, s), 7.44 (1H, d, *J* = 8.0 Hz), 7.72 (2H, d, *J* = 8.0 Hz), 8.09 (1H, d, *J* = 6.8 Hz); <sup>13</sup>C NMR (CDCl<sub>3</sub>, 100 MHz, TMS)  $\delta$  21.3, 24.2, 28.1, 35.1, 42.7, 47.3, 52.3, 83.5, 103.0, 107.6, 115.2, 116.6, 118.7, 122.5, 123.4, 123.6, 124.3, 127.1, 128.7, 129.6, 129.9, 130.0, 135.3, 136.5, 143.6, 149.5, 170.3; HRMS (ESI) Calcd. for C<sub>36</sub>H<sub>42</sub>N<sub>3</sub>O<sub>8</sub>S<sup>+</sup> (M<sup>+</sup>+NH<sub>4</sub>): 676.2687, found: 676.2694.

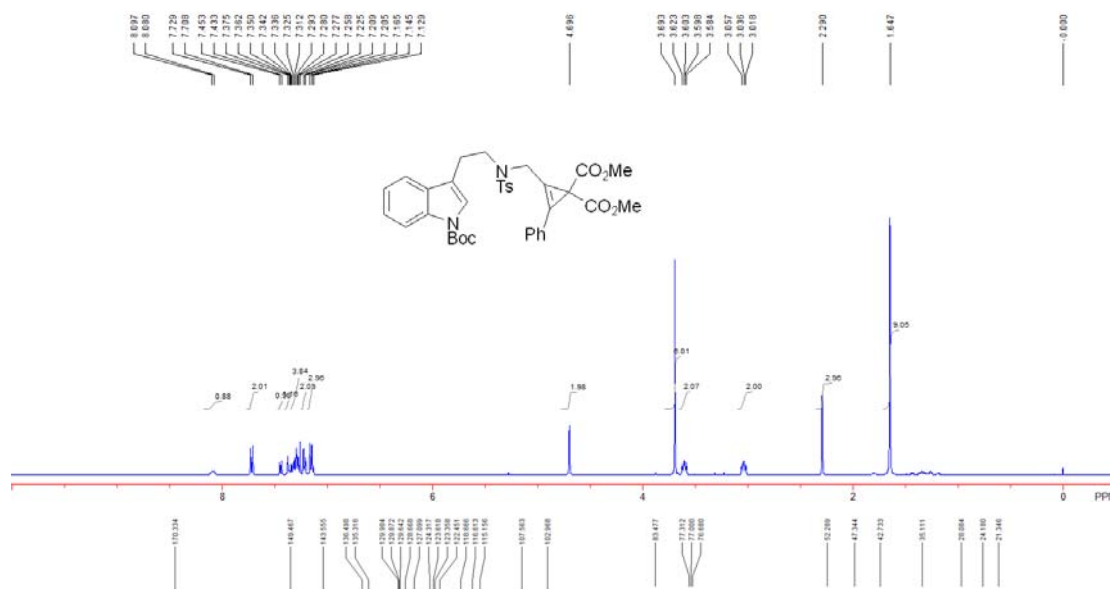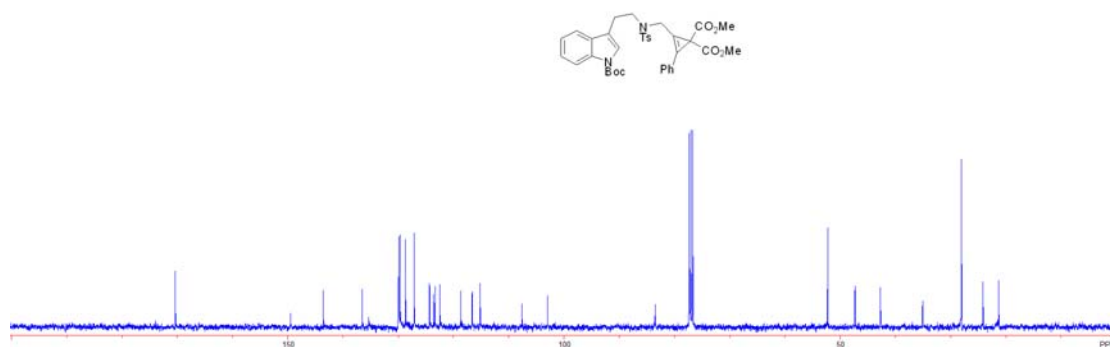





$\delta$  1.12 (18H, d,  $J = 7.2$  Hz), 1.64–1.71 (3H, m), 3.17 (2H, t,  $J = 7.6$  Hz), 3.67 (6H, s), 3.68 (2H, t,  $J = 7.6$  Hz), 4.64 (2H, s), 7.03–7.14 (5H, m), 7.23–7.27 (2H, m), 7.29–7.33 (1H, m), 7.49 (2H, dd,  $J_1 = J_2 = 9.2$  Hz), 7.99 (2H, d,  $J = 9.2$  Hz), 8.07 (2H, d,  $J = 9.2$  Hz);  $^{13}\text{C}$  NMR ( $\text{CDCl}_3$ , 100 MHz, TMS)  $\delta$  12.7, 18.1, 25.0, 35.2, 42.4, 47.8, 52.4, 102.4, 108.1, 113.2, 114.1, 118.2, 119.7, 121.6, 123.4, 124.1, 128.4, 128.8, 129.4, 129.6, 130.30, 130.34, 141.3, 145.3, 149.7, 170.2; HRMS (ESI) Calcd. for  $\text{C}_{39}\text{H}_{51}\text{N}_4\text{O}_8\text{SSi}^+$  ( $\text{M}^+ + \text{NH}_4$ ): 763.3191, found: 763.3187.

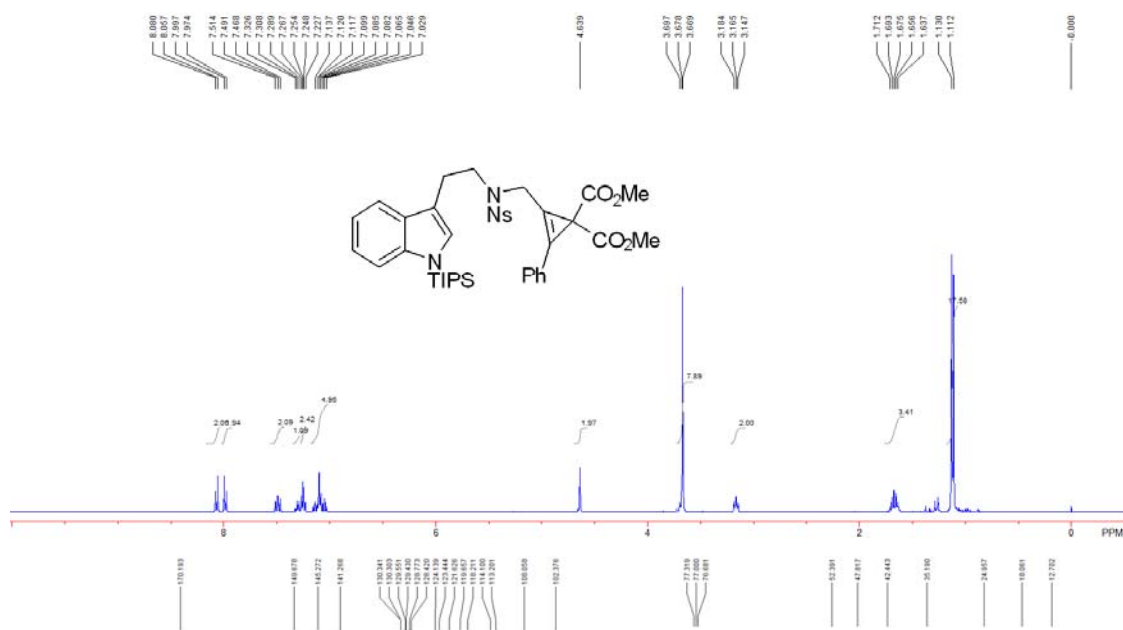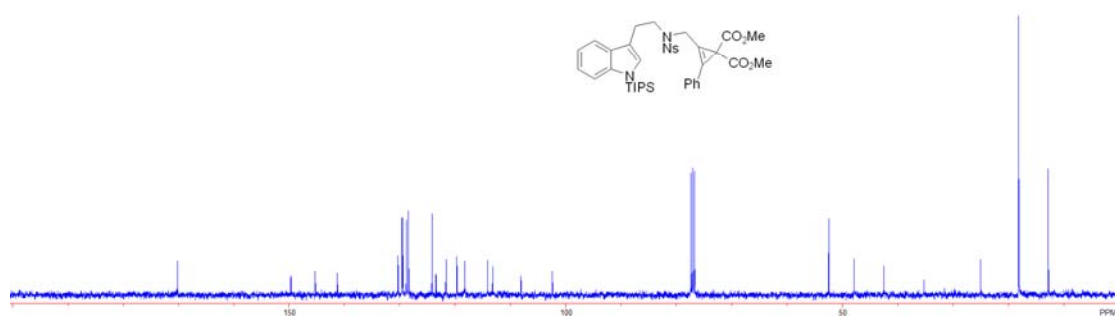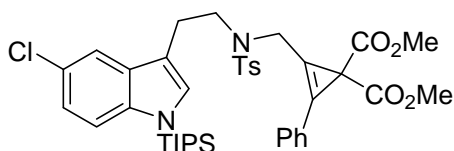

Compound **3d**: 152 mg, 20% yield; a colorless oil; IR (neat)  $\nu$  2950.1, 2925.7, 2868.2, 1731.4, 1442.1, 1349.3, 1283.7, 1259.0, 1159.1, 1134.3, 1092.2, 1065.9, 762.4, 691.2  $\text{cm}^{-1}$ ;  $^1\text{H}$  NMR ( $\text{CDCl}_3$ , 400 MHz, TMS)  $\delta$  1.09 (18H, d,  $J = 7.2$  Hz), 1.59–1.66 (3H, m), 2.30 (3H, s), 3.03 (2H, t,  $J = 7.6$  Hz), 3.58 (2H, t,  $J = 7.6$  Hz), 3.68



35.0, 42.6, 47.8, 52.2, 103.0, 107.4, 113.2, 113.5, 118.1, 122.9, 123.7, 127.2, 128.58, 128.63, 129.3, 129.7, 129.9, 130.7, 136.8, 139.4, 143.4, 170.3; HRMS (ESI) Calcd. for  $C_{41}H_{56}N_3O_6SSi^+$  ( $M^+ + NH_4$ ): 746.3654, found: 746.3649.

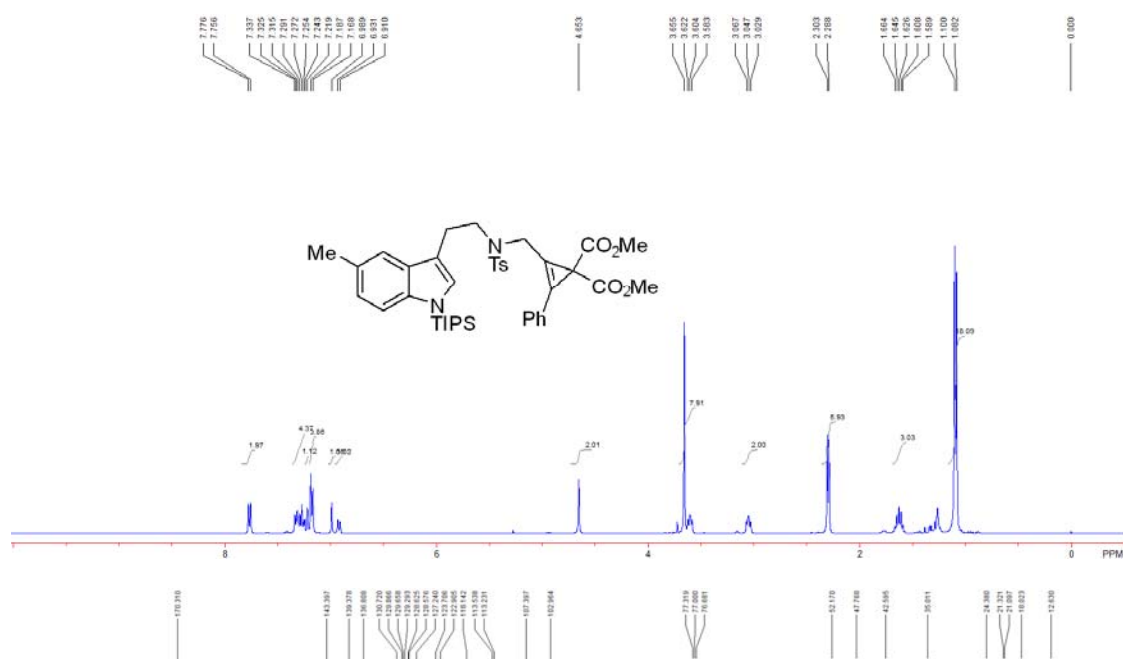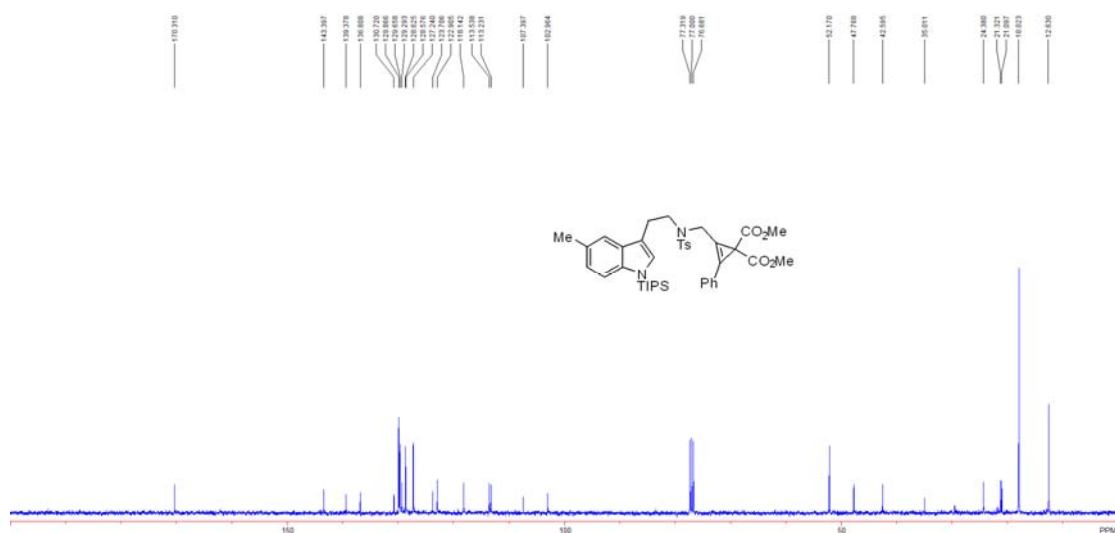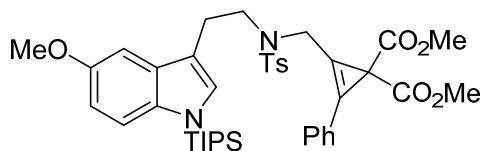

Compound **3f**: 134 mg, 18% yield; a colorless oil; IR (neat)  $\nu$  2949.2, 2867.7, 1727.5, 1479.1, 1448.5, 1435.1, 1347.0, 1271.3, 1228.9, 1156.6, 1095.4, 1065.6, 1034.5, 969.3, 882.7  $cm^{-1}$ ;  $^1H$  NMR ( $CDCl_3$ , 400 MHz, TMS)  $\delta$  1.09 (18H, d,  $J = 7.2$  Hz), 1.58–1.65 (3H, m), 2.29 (3H, s), 3.06 (2H, t,  $J = 7.6$  Hz), 3.61 (2H, t,  $J = 7.6$  Hz), 3.66 (6H, s), 3.70 (3H, s), 4.63 (2H, s), 6.76 (1H, d,  $J = 8.4$  Hz), 6.97–7.00 (2H, m), 7.16–7.17 (4H, m), 7.27–7.34 (4H, m), 7.75 (2H, d,  $J = 7.6$  Hz);  $^{13}C$  NMR ( $CDCl_3$ , 100 MHz, TMS)  $\delta$  12.6, 18.0, 21.3, 24.7, 35.0,

42.7, 47.7, 52.3, 55.4, 100.0, 103.0, 107.4, 111.5, 113.6, 114.6, 123.7, 127.2, 128.7, 129.7, 129.87, 129.92, 131.0, 136.0, 136.9, 143.4, 153.8, 170.4; HRMS (ESI) Calcd. for  $C_{41}H_{56}N_3O_7SSi^+$  ( $M^+ + NH_4$ ): 762.3603, found: 762.3602.

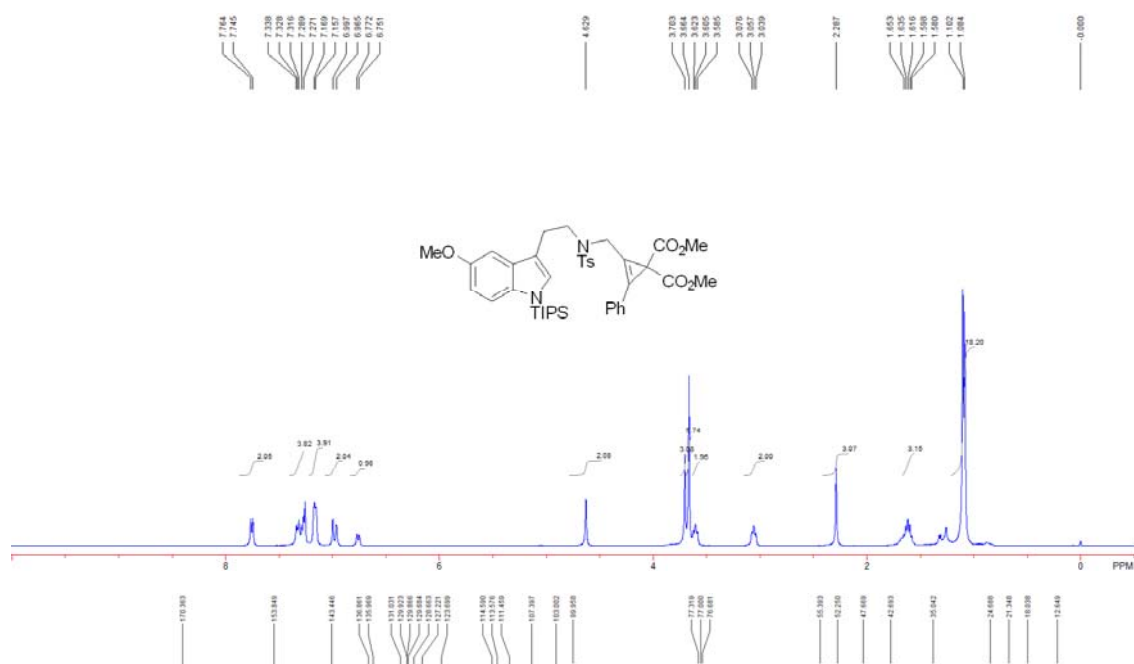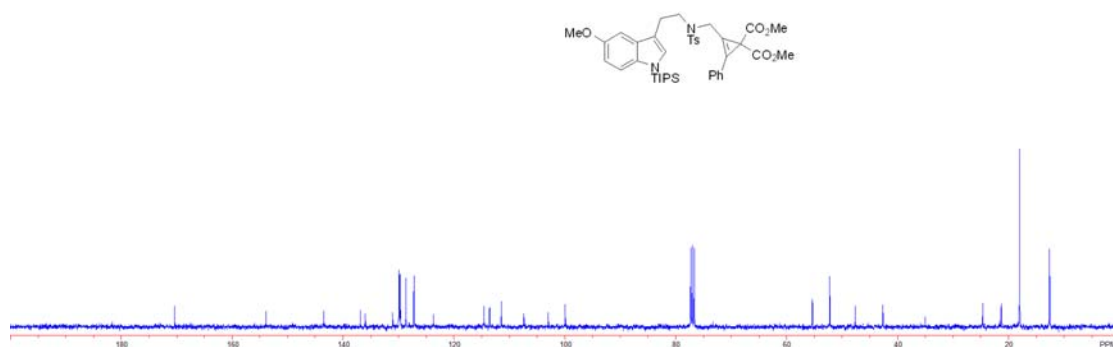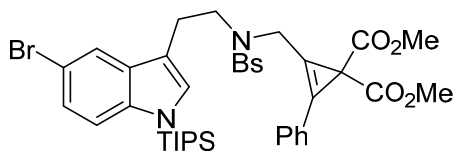

Compound **3g**: 64 mg, 32% yield; a colorless oil; IR (neat)  $\nu$  2955.0, 2922.3, 2851.8, 1733.7, 1717.3, 1558.1, 1541.2, 1507.6, 1457.3, 1375.4, 1160.5, 1089.2, 1016.9, 883.2, 749.7  $cm^{-1}$ ;  $^1H$  NMR ( $CDCl_3$ , 400 MHz, TMS)  $\delta$  1.10 (18H, d,  $J = 7.2$  Hz), 1.59–1.67 (3H, m), 3.06 (2H, t,  $J = 7.6$  Hz), 3.59 (2H, t,  $J = 7.6$  Hz), 3.69 (6H, s), 4.62 (2H, s), 7.08 (1H, s), 7.19 (3H, d,  $J = 7.6$  Hz), 7.31–7.39 (4H, m), 7.51 (2H, d,  $J = 8.0$  Hz), 7.57 (1H, s), 7.73 (2H, d,  $J = 8.0$  Hz);  $^{13}C$  NMR ( $CDCl_3$ , 100 MHz, TMS)  $\delta$  12.6, 18.0, 24.3, 35.1, 42.5, 47.6, 52.4, 102.5,



118.2, 119.7, 121.7, 122.0, 124.2, 128.4, 129.2, 129.4, 130.3, 131.0, 136.6, 141.3, 145.3, 149.8, 170.1; HRMS (ESI) Calcd. for C<sub>39</sub>H<sub>50</sub>ClN<sub>4</sub>O<sub>8</sub>SSi<sup>+</sup> (M<sup>+</sup>+NH<sub>4</sub>): 797.2802, found: 797.2801.

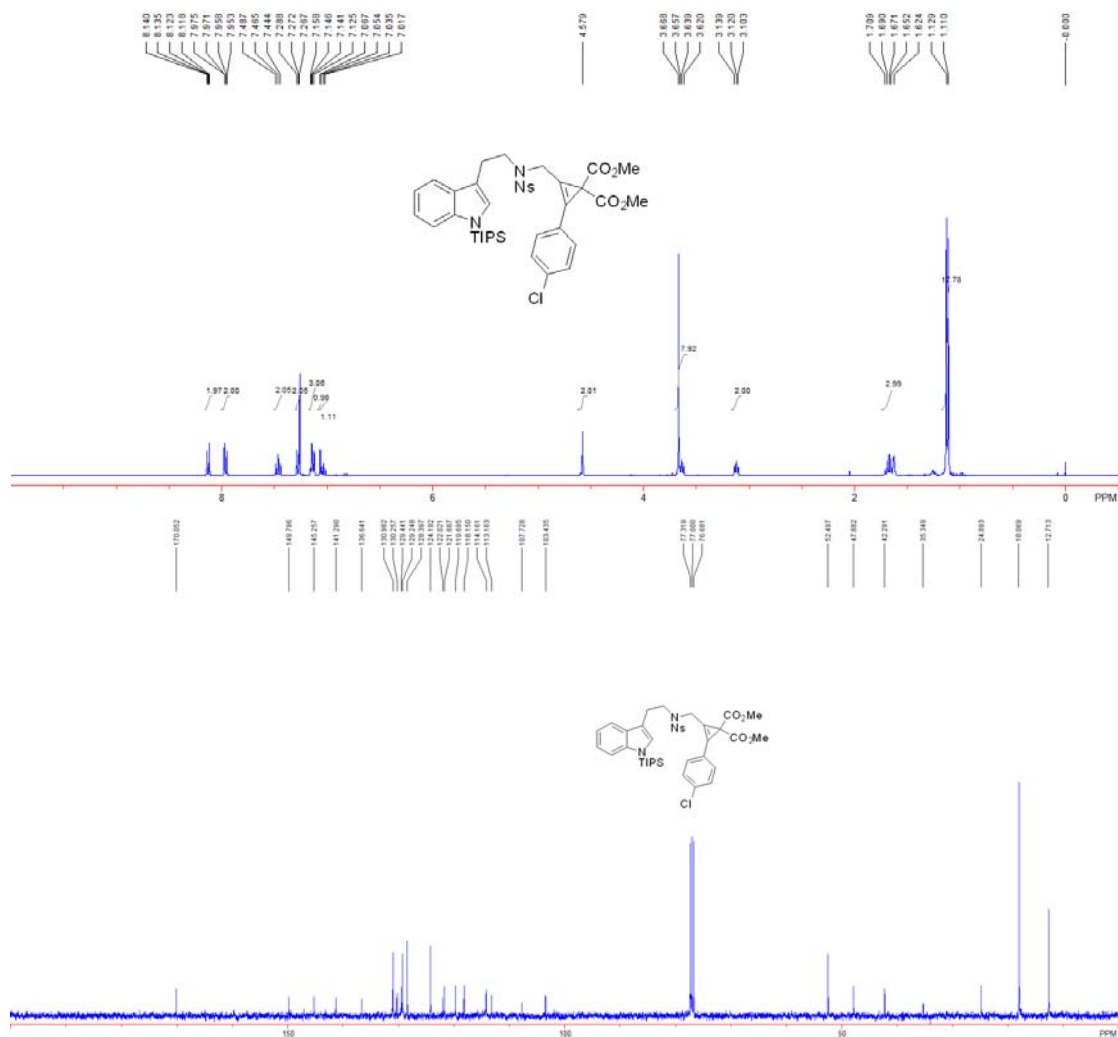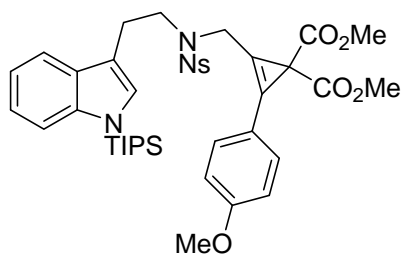

Compound **3i**: 286 mg, 54% yield; a colorless oil; IR (neat)  $\nu$  2951.6, 2869.2, 1730.5, 1605.1, 1530.8, 1509.5, 1451.6, 1349.5, 1284.4, 1254.3, 1163.5, 1142.8, 1066.6, 1016.2, 883.0, 740.5 cm<sup>-1</sup>; <sup>1</sup>H NMR (CDCl<sub>3</sub>, 400 MHz, TMS)  $\delta$  1.12 (18H, d,  $J$  = 7.6 Hz), 1.64–1.71 (3H, m), 3.16 (2H, t,  $J$  = 7.6 Hz), 3.66 (6H, s), 3.67 (2H, t,  $J$  = 7.6 Hz), 3.77 (3H, s), 4.62 (2H, s), 6.76 (2H, d,  $J$  = 8.8 Hz), 7.03–7.07 (3H, m), 7.10–7.16 (2H, m), 7.48 (1H, d,  $J$  = 8.4 Hz), 7.51 (1H, d,  $J$  = 7.6 Hz), 7.98 (2H, d,  $J$  = 8.8 Hz), 8.07 (2H, d,  $J$  = 8.8 Hz); <sup>13</sup>C NMR (CDCl<sub>3</sub>, 100 MHz, TMS)  $\delta$  12.6, 18.0, 24.9, 35.1, 42.3, 47.7, 52.3, 55.3, 99.4, 107.6, 113.2, 114.0, 114.3, 115.2, 115.7, 118.2,

119.6, 121.5, 124.1, 128.3, 129.4, 130.3, 131.2, 141.2, 145.2, 149.6, 161.1, 170.4; HRMS (ESI) Calcd. for  $C_{40}H_{53}N_4O_9SSi^+$  ( $M^+ + NH_4$ ): 793.3297, found: 793.3297.

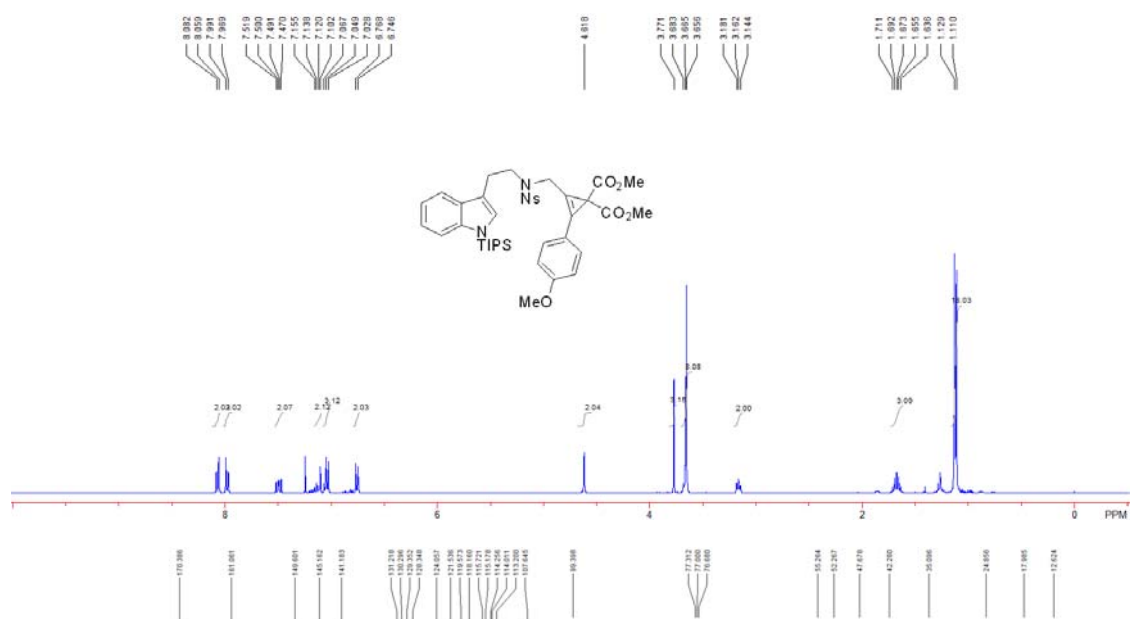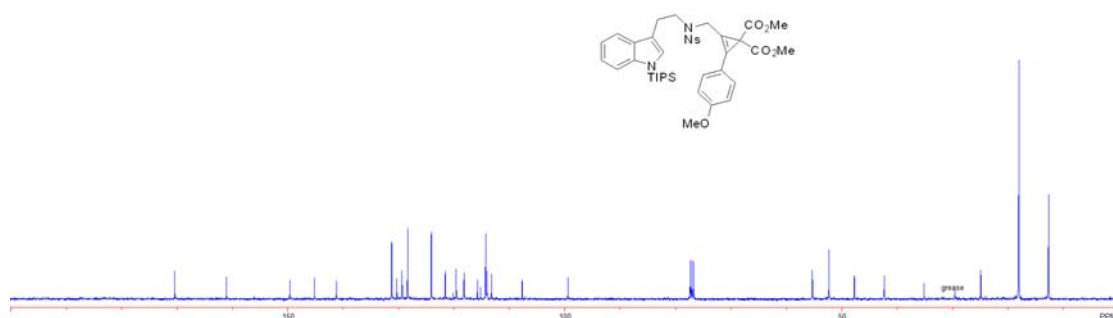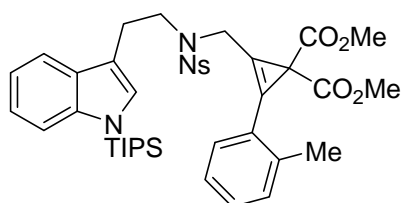

Compound **3j**: 368 mg, 81% yield; a colorless oil; IR (neat)  $\nu$  2951.4, 2868.8, 1735.5, 1720.0, 1606.9, 1536.1, 1450.6, 1351.5, 1279.6, 1255.1, 1162.1, 1136.2, 1057.5, 962.0, 738.8  $cm^{-1}$ ;  $^1H$  NMR ( $CDCl_3$ , 400 MHz, TMS)  $\delta$  1.12 (18H, d,  $J = 7.6$  Hz), 1.63–1.71 (3H, m), 2.22 (3H, s), 3.13 (2H, t,  $J = 7.2$  Hz), 3.60 (2H, t,  $J = 7.2$  Hz), 3.61 (6H, s), 4.61 (2H, s), 7.01 (1H, dd,  $J_1 = J_2 = 7.6$  Hz), 7.06 (1H, s), 7.11–7.20 (3H, m), 7.25 (1H, d,  $J = 7.6$  Hz), 7.30 (1H, dd,  $J_1 = J_2 = 7.6$  Hz), 7.47 (2H, d,  $J = 8.4$  Hz), 7.98 (2H, d,  $J = 8.4$  Hz), 8.20 (2H, d,  $J = 8.4$  Hz);  $^{13}C$  NMR ( $CDCl_3$ , 100 MHz, TMS)  $\delta$  12.7, 18.1, 20.4, 25.0, 34.8, 41.8, 47.9, 52.3, 102.9, 108.8, 113.3, 114.1,

118.2, 119.7, 121.7, 123.1, 124.2, 126.3, 128.4, 129.4, 130.3, 130.8, 131.0, 138.8, 141.3, 145.7, 149.8, 170.3;

HRMS (ESI) Calcd. for  $C_{40}H_{53}N_4O_8SSi^+$  ( $M^+ + NH_4$ ): 777.3348, found: 777.3346.

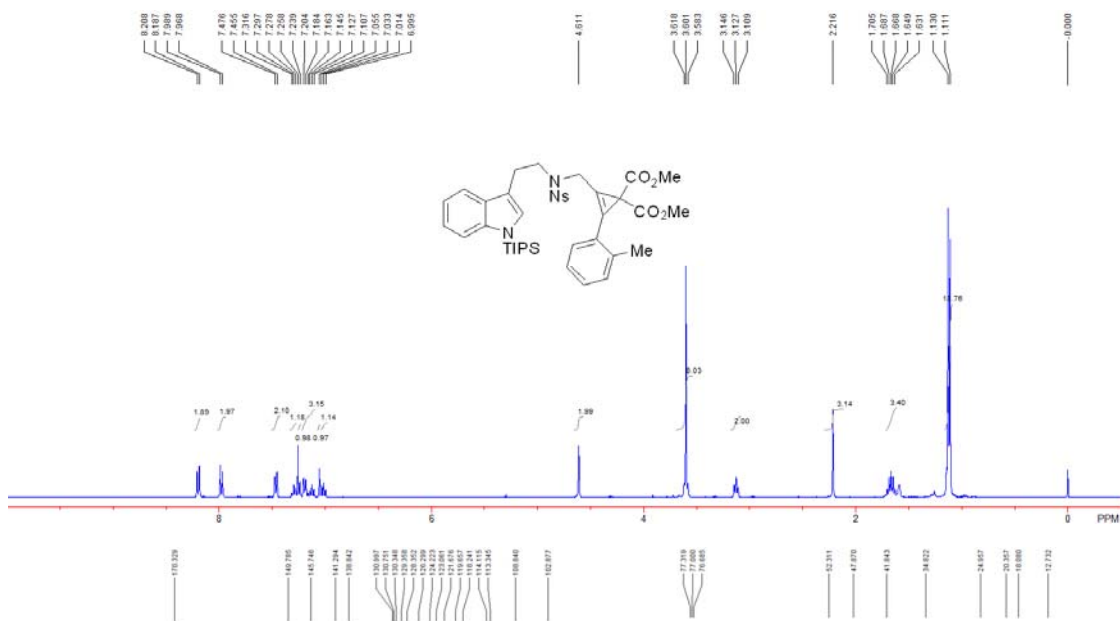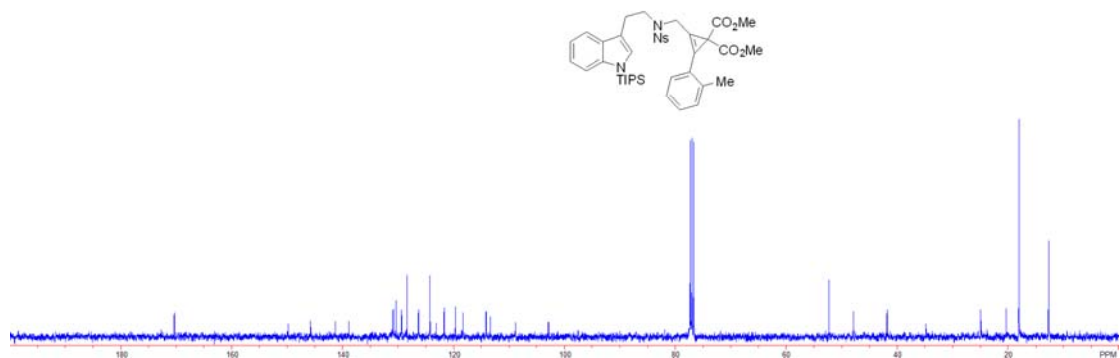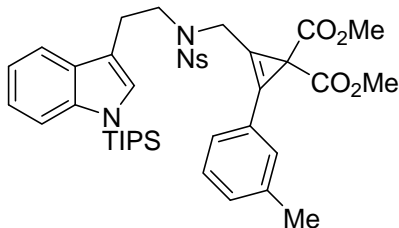

Compound **3k**: 350 mg, 77% yield; a colorless oil; IR (neat)  $\nu$  2949.2, 2867.0, 1736.8, 1607.1, 1536.7, 1453.6, 1351.4, 1288.2, 1163.6, 1138.5, 1089.0, 1067.1, 1014.9, 968.4, 741.0  $cm^{-1}$ ;  $^1H$  NMR ( $CDCl_3$ , 400 MHz, TMS)  $\delta$  1.12 (18H, d,  $J = 7.6$  Hz), 1.64–1.71 (3H, m), 2.26 (3H, s), 3.17 (2H, t,  $J = 7.2$  Hz), 3.67 (6H, s), 3.68 (2H, t,  $J = 7.2$  Hz), 4.63 (2H, s), 6.86 (1H, d,  $J = 5.2$  Hz), 6.91 (1H, s), 7.05 (1H, dd,  $J_1 = J_2 = 7.6$  Hz), 7.10–7.15 (4H, m), 7.47 (1H, d,  $J = 8.4$  Hz), 7.51 (1H, d,  $J = 7.6$  Hz), 7.99 (2H, d,  $J = 8.8$  Hz), 8.06 (2H, d,  $J = 8.8$  Hz);  $^{13}C$  NMR ( $CDCl_3$ , 100 MHz, TMS)  $\delta$  12.7, 18.1, 21.1, 25.0, 35.2, 42.5, 47.8, 52.4, 102.0, 108.0, 113.2, 114.1,



118.2, 119.6, 121.6, 123.3, 124.1, 126.7, 128.4, 128.7, 129.4, 129.9, 130.4, 131.2, 138.7, 141.3, 145.3, 149.6, 170.2; HRMS (ESI) Calcd. for  $C_{40}H_{53}N_4O_8SSi^+$  ( $M^+ + NH_4$ ): 777.3348, found: 777.3346.

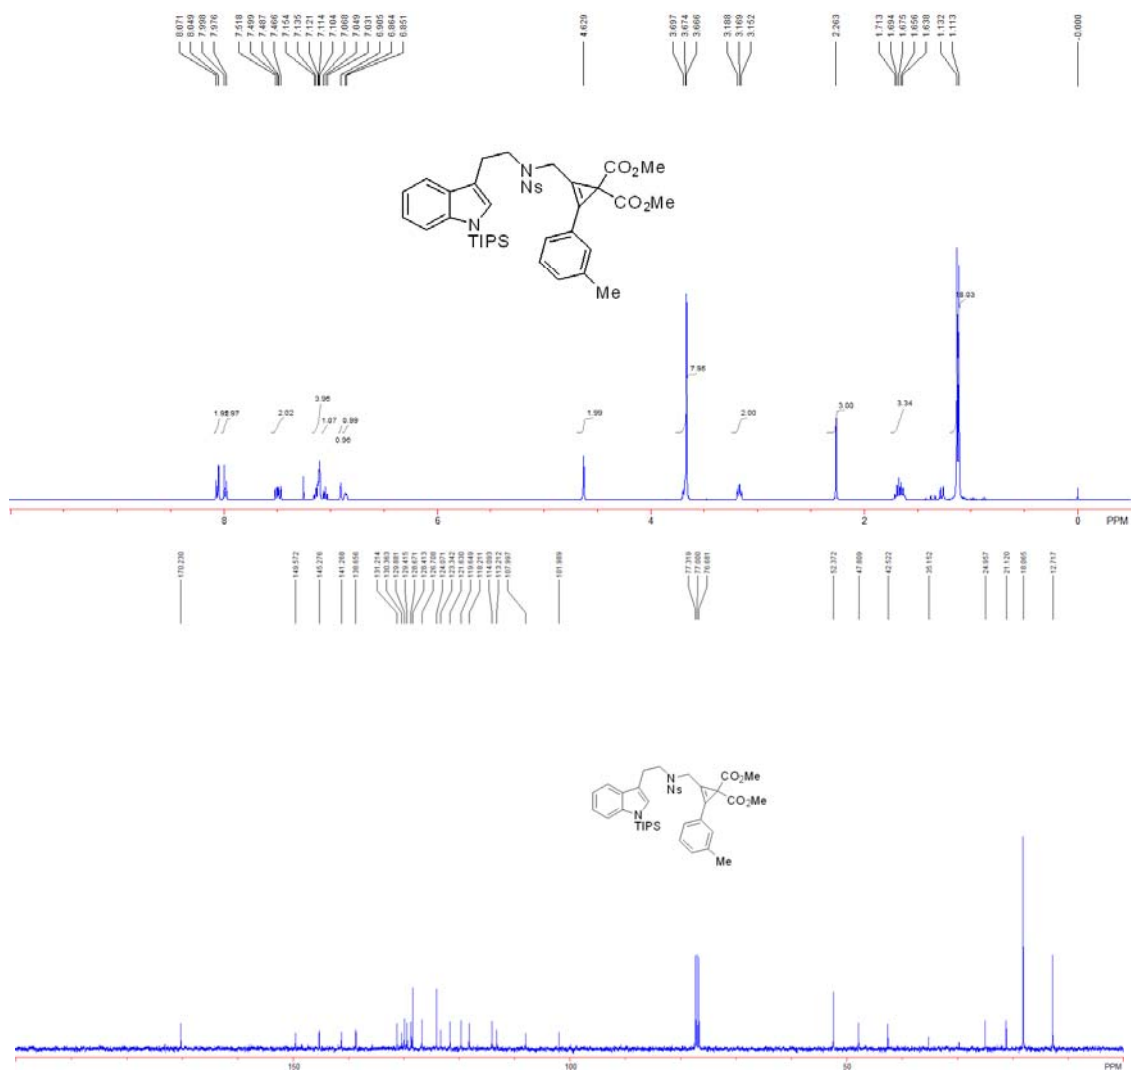

## General Procedure and Spectroscopic Data of the Products 4

A solution of compound **3** (0.1 mmol) was stirred at ambient temperature in the mixed solvent of TFA and DCM (1:1). Then 10 mol% of HOTf was added into the reaction system. Once the reaction was complete, the solvent was removed under reduced pressure and the residue was chromatographed on silica gel (elution with petroleum ether/ethyl acetate = 5/1) to provide the corresponding product **4**.

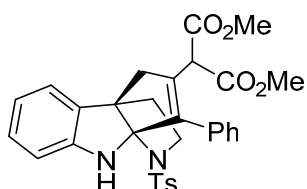

Compound **4a**: 45 mg, 81% yield; a green solid; mp. 92–94 °C; IR (neat)  $\nu$  2953.3, 2922.8, 2852.9, 1734.5, 1609.9, 1484.5, 1465.3, 1435.4, 1330.8, 1197.6, 1150.5, 1087.5, 1029.5, 814.9, 702.8  $\text{cm}^{-1}$ ;  $^1\text{H}$  NMR ( $\text{CDCl}_3$ , 400 MHz, TMS)  $\delta$  1.87–1.94 (1H, m), 2.18–2.24 (1H, m), 2.29 (3H, s), 2.87 (1H, d,  $J = 16.8$  Hz), 2.99 (1H, d,  $J = 16.8$  Hz), 3.28–3.34 (1H, m), 3.46–3.52 (1H, m), 3.59 (3H, s), 3.72 (3H, s), 4.16 (1H, s), 6.63 (1H, d,  $J = 7.6$  Hz), 6.72–6.76 (1H, m), 7.06–7.12 (4H, m), 7.28 (2H, dd,  $J = 1.6, 7.2$  Hz), 7.41–7.45 (3H, m), 7.48 (2H, d,  $J = 8.4$  Hz);  $^{13}\text{C}$  NMR ( $\text{CDCl}_3$ , 100 MHz, TMS)  $\delta$  21.3, 37.5, 44.3, 48.8, 51.8, 52.6, 52.8, 64.6, 103.8, 109.3, 119.2, 123.3, 127.5, 128.2, 128.3, 128.6, 129.1, 129.7, 132.5, 133.4, 134.2, 136.8, 142.8, 143.7, 148.3, 167.5, 167.9; HRMS (ESI) Calcd. for  $\text{C}_{31}\text{H}_{31}\text{N}_2\text{O}_6\text{S}^+$  ( $\text{M}^++\text{H}$ ): 559.1897, found: 559.1902.

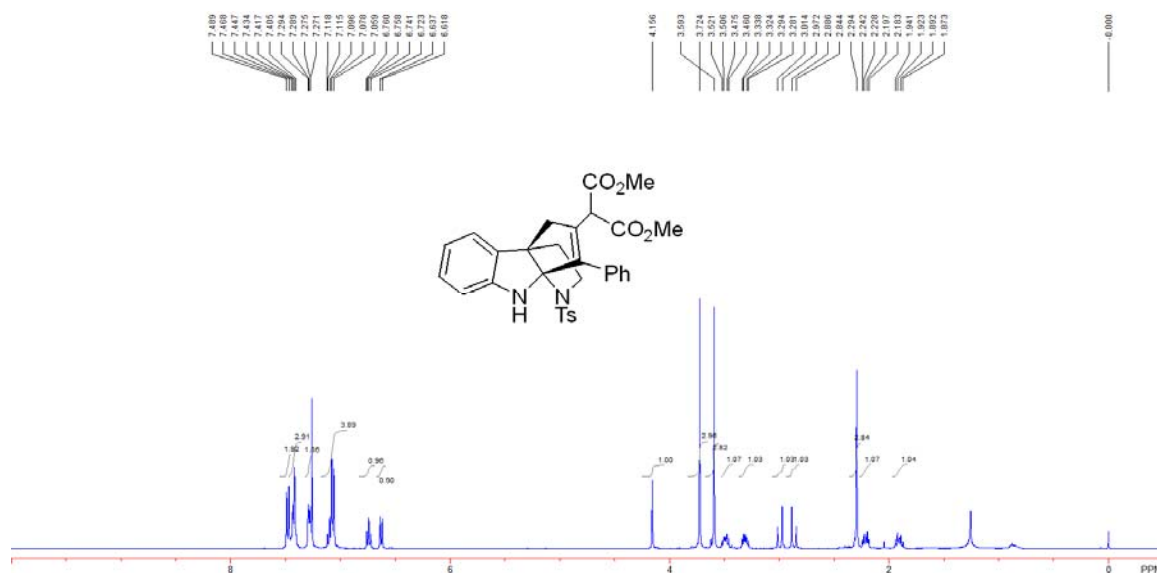

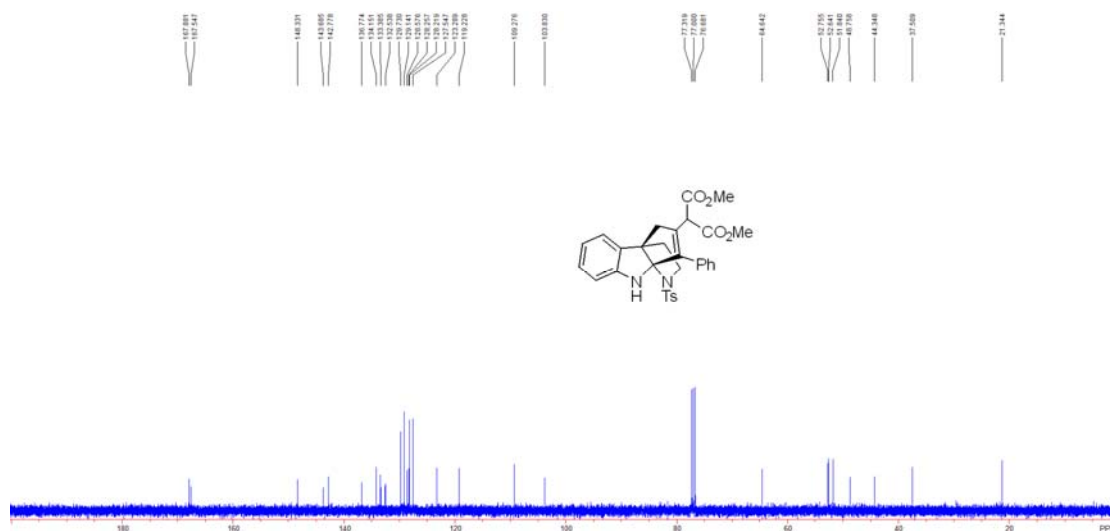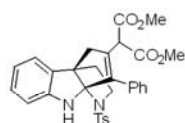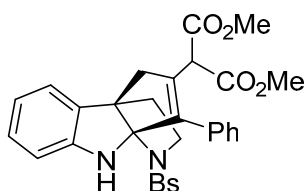

Compound **4b**: 52 mg, 84% yield; a green solid; mp. 98–100 °C; IR (neat)  $\nu$  3406.8, 2953.6, 2924.2, 2852.3, 1733.2, 1609.9, 1574.2, 1484.2, 1465.4, 1435.1, 1332.2, 1265.7, 1195.9, 1149.7, 1084.8, 1068.0, 1029.0, 1008.2, 735.1, 701.3  $\text{cm}^{-1}$ ;  $^1\text{H}$  NMR ( $\text{CDCl}_3$ , 400 MHz, TMS)  $\delta$  1.87–1.93 (1H, m), 2.21–2.26 (1H, m), 2.88 (1H, d,  $J = 16.8$  Hz), 3.01 (1H, d,  $J = 16.8$  Hz), 3.33–3.38 (1H, m), 3.50–3.56 (1H, m), 3.59 (3H, s), 3.72 (3H, s), 4.15 (1H, s), 5.50 (1H, s), 6.63 (1H, d,  $J = 7.6$  Hz), 6.77 (1H, dd,  $J_1 = J_2 = 7.2$  Hz), 7.07–7.13 (2H, m), 7.25–7.27 (2H, m), 7.39–7.47 (7H, m);  $^{13}\text{C}$  NMR ( $\text{CDCl}_3$ , 100 MHz, TMS)  $\delta$  37.5, 44.4, 48.9, 51.8, 52.6, 52.8, 64.7, 104.0, 109.4, 119.6, 123.4, 127.0, 128.30, 128.34, 128.7, 129.0, 129.7, 131.7, 132.5, 133.2, 134.6, 138.9, 143.2, 148.0, 167.4, 167.8; HRMS (ESI) Calcd. for  $\text{C}_{30}\text{H}_{28}\text{BrN}_2\text{O}_6\text{S}^+$  ( $\text{M}^+ + \text{H}$ ): 623.0846, found: 623.0845.

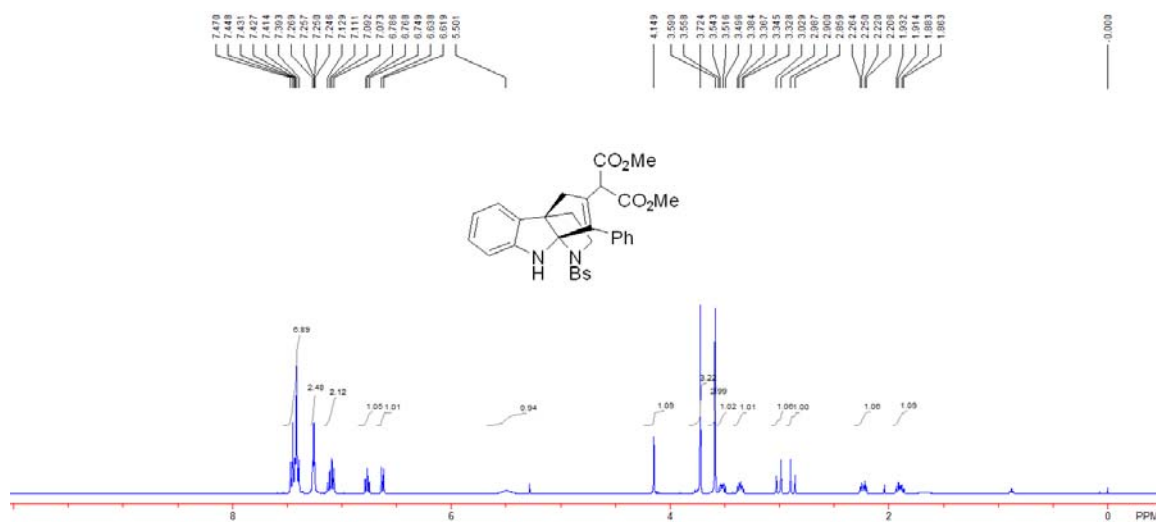

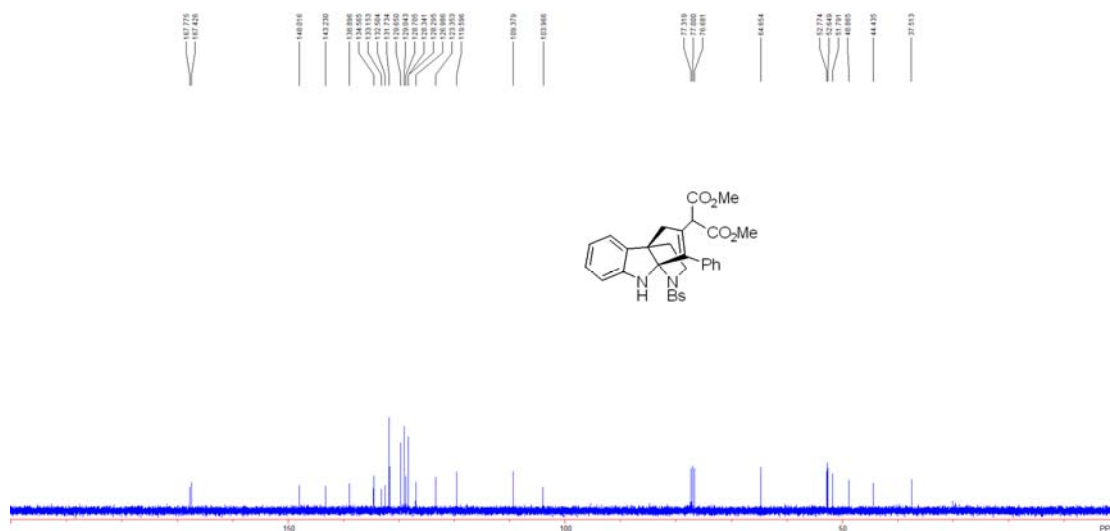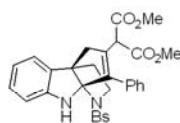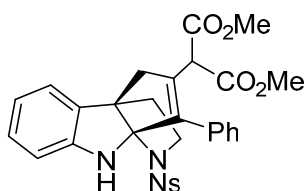

Compound **4c**: 44 mg, 99% yield; a green solid; mp. 105–107 °C; IR (neat)  $\nu$  3402.9, 2953.6, 1732.6, 1608.4, 1528.4, 1484.3, 1465.6, 1435.5, 1348.0, 1307.9, 1232.6, 1197.0, 1152.0, 1117.1, 1085.9, 1044.3, 909.8, 732.4  $\text{cm}^{-1}$ ;  $^1\text{H}$  NMR ( $\text{CDCl}_3$ , 400 MHz, TMS)  $\delta$  1.83–1.90 (1H, m), 2.24–2.30 (1H, m), 2.90 (1H, d,  $J = 16.8$  Hz), 3.03 (1H, d,  $J = 16.8$  Hz), 3.44–3.50 (1H, m), 3.58–3.64 (1H, m), 3.60 (3H, s), 3.73 (3H, s), 4.14 (1H, s), 5.40 (1H, s), 6.63 (1H, d,  $J = 7.6$  Hz), 6.77 (1H, dd,  $J_1 = J_2 = 7.2$  Hz), 7.07–7.13 (2H, m), 7.24–7.25 (2H, m), 7.43–7.44 (3H, m), 7.78 (2H, d,  $J = 8.4$  Hz), 8.10 (2H, d,  $J = 8.4$  Hz);  $^{13}\text{C}$  NMR ( $\text{CDCl}_3$ , 100 MHz, TMS)  $\delta$  37.8, 44.8, 49.1, 51.8, 52.7, 52.8, 64.7, 104.2, 109.6, 120.1, 123.5, 123.7, 128.49, 128.55, 128.7, 128.9, 129.7, 132.7, 133.0, 135.3, 142.8, 145.9, 147.8, 149.5, 167.4, 167.7; HRMS (ESI) Calcd. for  $\text{C}_{30}\text{H}_{38}\text{N}_3\text{O}_8\text{S}^+$  ( $\text{M}^+\text{+H}$ ): 590.1592, found: 590.1590.

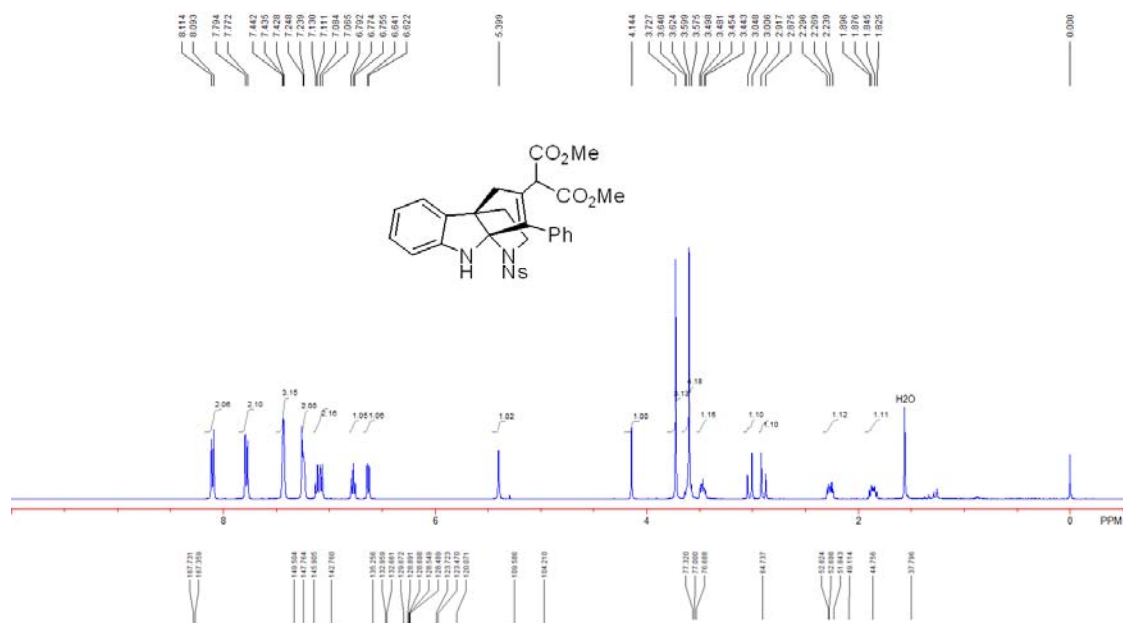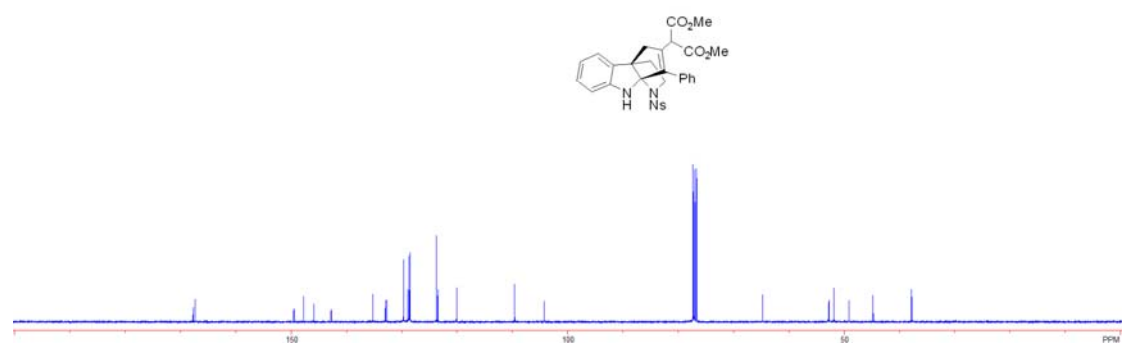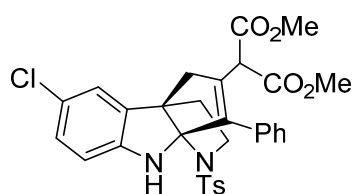

Compound **4d**: 37 mg, 62% yield; a yellow solid; mp. 96–98 °C; IR (neat)  $\nu$  3404.9, 2953.1, 2925.1, 2853.8, 1934.8, 1479.0, 1434.2, 1329.9, 1270.0, 1196.5, 1151.6, 1087.2, 1029.8, 705.4, 673.1  $\text{cm}^{-1}$ ; <sup>1</sup>H NMR (CDCl<sub>3</sub>, 400 MHz, TMS)  $\delta$  1.88–1.92 (1H, m), 2.19–2.23 (1H, m), 2.31 (3H, s), 2.84 (1H, d,  $J = 16.4$  Hz), 2.98 (1H, d,  $J = 16.4$  Hz), 3.31–3.34 (1H, m), 3.44–3.50 (1H, m), 3.62 (3H, s), 3.73 (3H, s), 4.16 (1H, s), 5.60 (1H, s), 6.54 (1H, d,  $J = 8.0$  Hz), 7.02–7.10 (4H, m), 7.26 (2H, s), 7.42–7.46 (5H, m); <sup>13</sup>C NMR (CDCl<sub>3</sub>, 100 MHz, TMS)  $\delta$  21.4, 37.4, 44.3, 48.7, 51.8, 52.7, 52.8, 64.5, 104.1, 110.1, 123.6, 127.5, 128.3, 128.4, 128.5, 129.2, 129.7, 133.1, 134.2, 136.6, 143.0, 143.5, 146.9, 167.4, 167.8; HRMS (ESI) Calcd. for C<sub>31</sub>H<sub>30</sub>ClN<sub>2</sub>O<sub>6</sub>S<sup>+</sup> (M<sup>+</sup>+H): 593.1508, found: 593.1510.



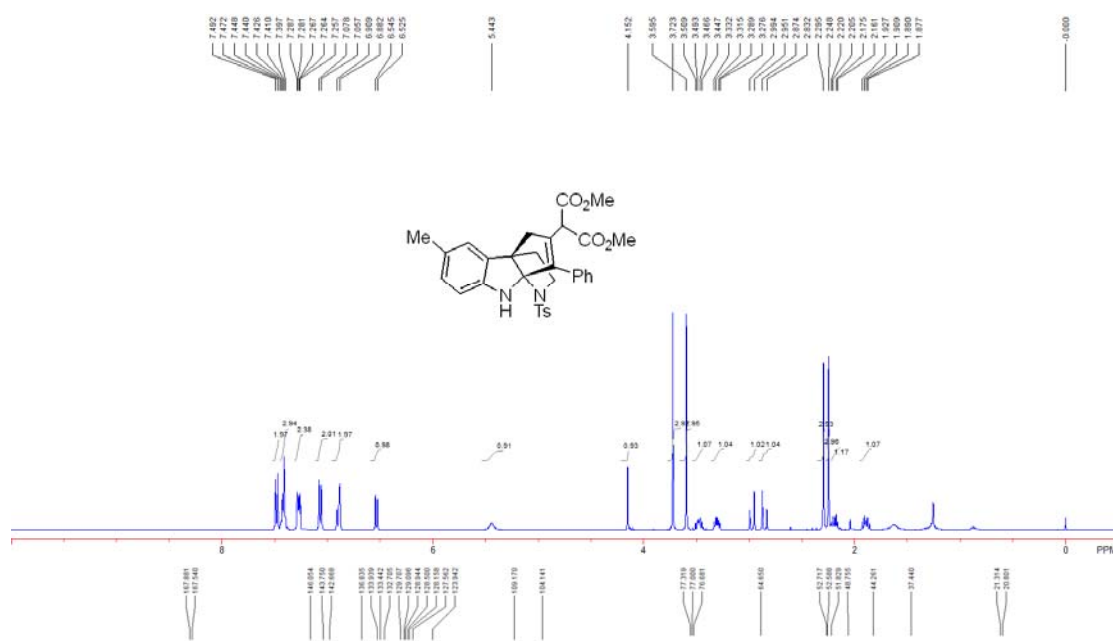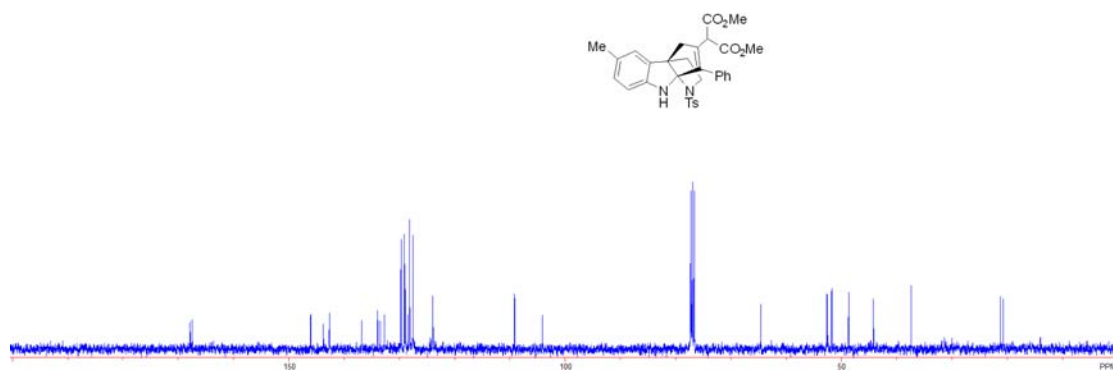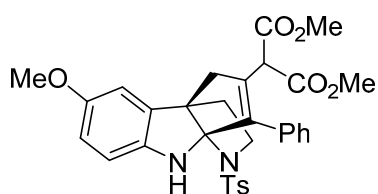

Compound **4f**: 33 mg, 84% yield; a yellow solid; mp. 110–112 °C; IR (neat)  $\nu$  2953.9, 2921.6, 2851.3, 1735.5, 1490.8, 1462.8, 1435.7, 1330.1, 1152.2, 1028.8, 811.6, 675.0  $\text{cm}^{-1}$ ;  $^1\text{H}$  NMR ( $\text{CDCl}_3$ , 400 MHz, TMS)  $\delta$  1.88–1.94 (1H, m), 2.18–2.22 (1H, m), 2.30 (3H, s), 2.85 (1H, d,  $J = 16.8$  Hz), 2.97 (1H, d,  $J = 16.8$  Hz), 3.28–3.32 (1H, m), 3.45–3.51 (1H, m), 3.61 (3H, s), 3.73 (3H, s), 3.74 (3H, s), 4.16 (1H, s), 6.54–6.57 (1H, m), 6.66–6.68 (2H, m), 7.07 (2H, d,  $J = 8.0$  Hz), 7.28–7.29 (2H, m), 7.41–7.43 (3H, m), 7.48 (2H, d,  $J = 8.0$  Hz);  $^{13}\text{C}$  NMR ( $\text{CDCl}_3$ , 100 MHz, TMS)  $\delta$  21.3, 37.3, 44.1, 48.8, 51.8, 52.6, 52.7, 55.9, 65.0, 104.5, 109.91, 110.00, 113.5, 127.6, 128.18, 128.23, 129.1, 129.7, 133.4, 133.8, 136.8, 142.4, 142.7, 143.8, 153.7, 167.5, 167.9; HRMS (ESI) Calcd. for  $\text{C}_{32}\text{H}_{33}\text{N}_2\text{O}_7\text{S}^+$  ( $\text{M}^++\text{H}$ ): 589.2003, found: 589.2005.





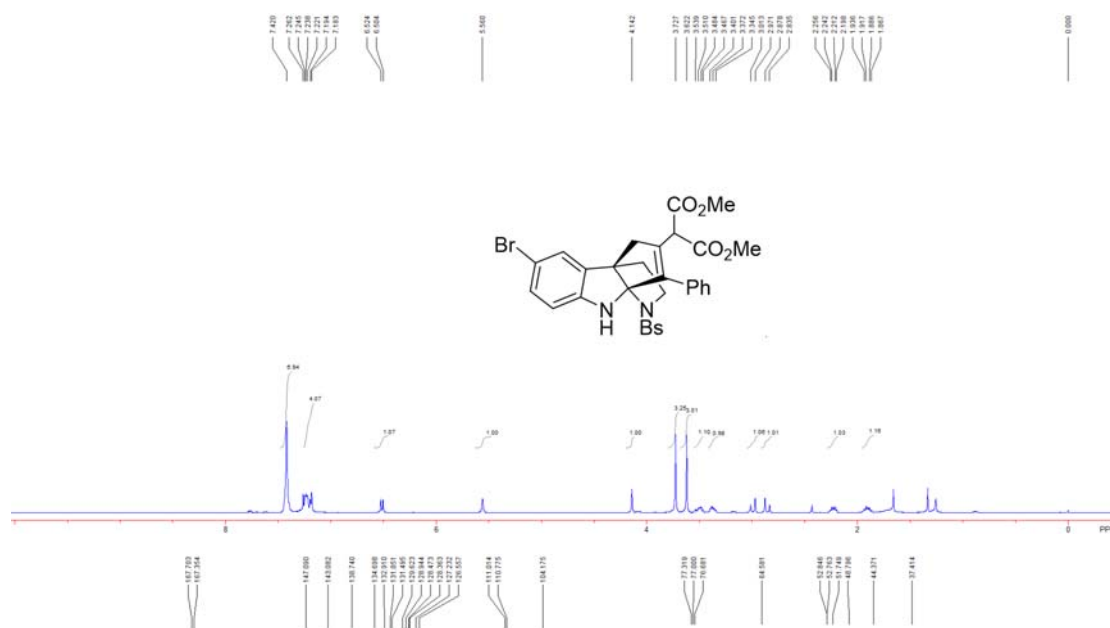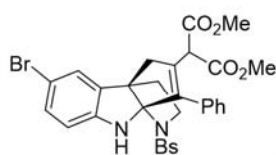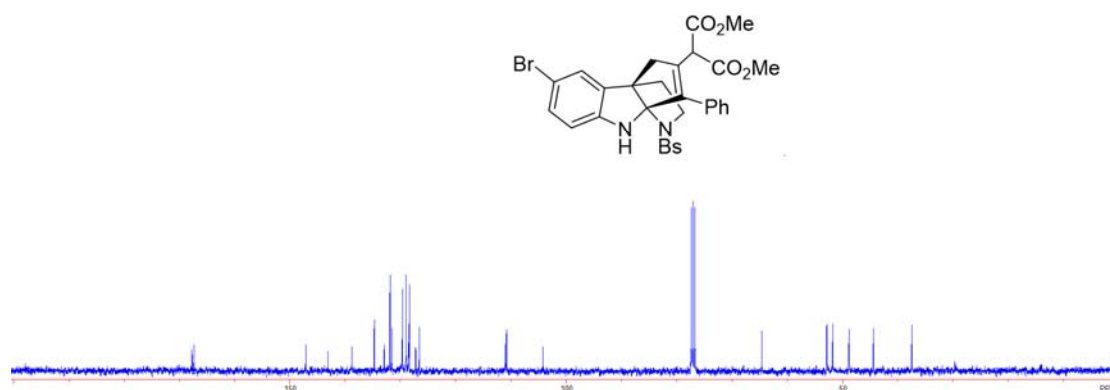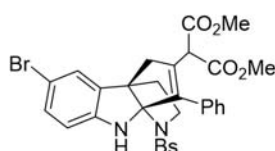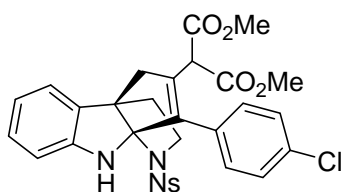

Compound **4h**: 55 mg, 88% yield; a yellow solid; mp. 111–113 °C; IR (neat)  $\nu$  2954.3, 2925.1, 2854.1, 1736.9, 1607.4, 1529.3, 1484.3, 1466.6, 1351.0, 1309.7, 1262.7, 1166.5, 1088.3, 1025.6, 911.3, 734.8  $\text{cm}^{-1}$ ;  $^1\text{H}$  NMR ( $\text{CDCl}_3$ , 400 MHz, TMS)  $\delta$  1.80–1.87 (1H, m), 2.24–2.30 (1H, m), 2.90 (1H, d,  $J = 17.2$  Hz), 3.00 (1H, d,  $J = 17.2$  Hz), 3.43–3.49 (1H, m), 3.59–3.65 (1H, m), 3.61 (3H, s), 3.73 (3H, s), 4.09 (1H, s), 5.36 (1H, s), 6.63 (1H, d,  $J = 7.6$  Hz), 6.77 (1H, dd,  $J_1 = J_2 = 7.6$  Hz), 7.06–7.12 (2H, m), 7.20 (2H, d,  $J = 8.0$  Hz), 7.40 (2H, d,  $J = 8.0$  Hz), 7.83 (2H, d,  $J = 8.8$  Hz), 8.12 (2H, d,  $J = 8.8$  Hz);  $^{13}\text{C}$  NMR ( $\text{CDCl}_3$ , 100 MHz, TMS)  $\delta$  37.8, 44.7, 49.1, 51.7, 52.8, 52.9, 64.7, 103.9, 109.5, 120.1, 123.4, 123.7, 128.67, 128.74, 128.9, 131.0, 131.2, 132.5, 134.7,



(CDCl<sub>3</sub>, 100 MHz, TMS)  $\delta$  37.9, 44.7, 49.2, 51.8, 52.7, 52.8, 55.2, 64.5, 104.1, 109.6, 113.9, 120.0, 123.4, 123.7, 124.8, 128.6, 128.8, 130.9, 132.8, 135.2, 142.4, 145.9, 147.7, 149.4, 159.8, 167.4, 167.8; HRMS (ESI) Calcd. for C<sub>31</sub>H<sub>30</sub>N<sub>3</sub>O<sub>9</sub>S<sup>+</sup> (M<sup>+</sup>+H): 620.1697, found: 620.1698.

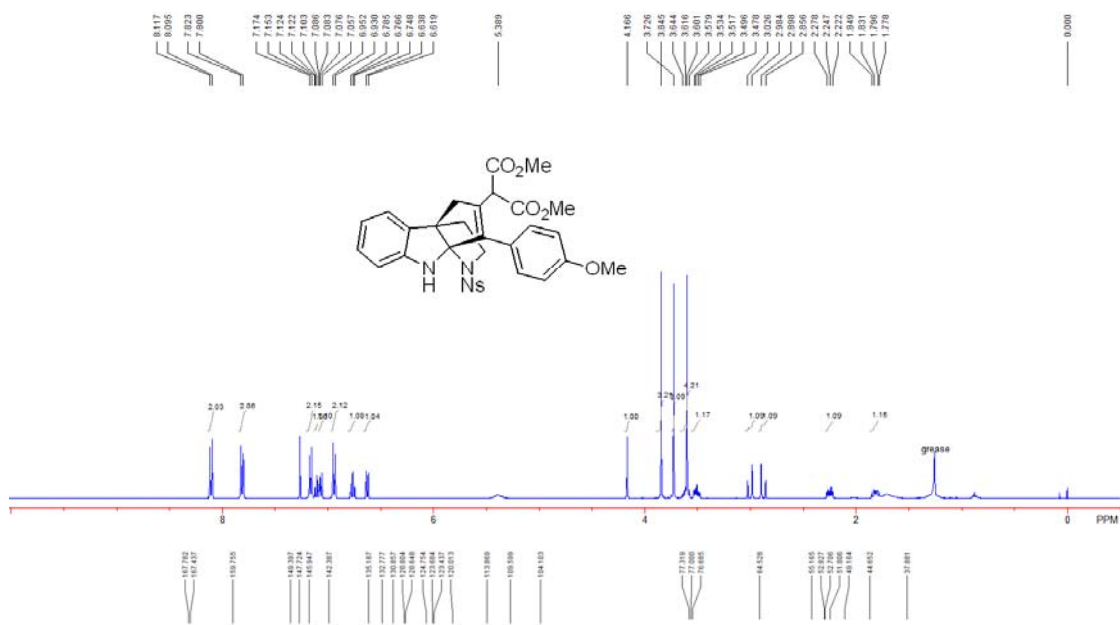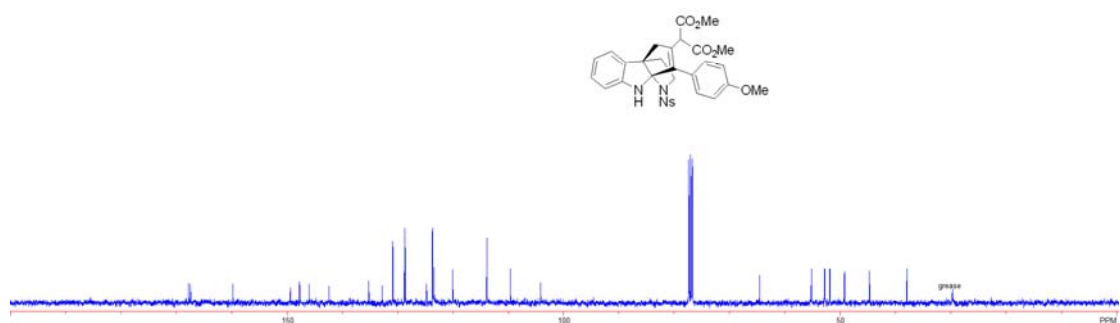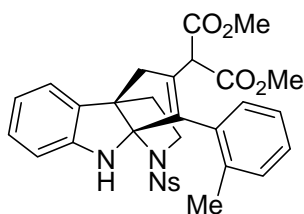

Compound **4j**: 43 mg, 71% yield; a yellow solid; mp. 120–122 °C; IR (neat)  $\nu$  3731.6, 2924.0, 2850.4, 1732.1, 1609.8, 1524.0, 1466.4, 1349.7, 1315.3, 1260.6, 1153.9, 1088.6, 1039.7, 745.9, 620.4 cm<sup>-1</sup>; <sup>1</sup>H NMR (CDCl<sub>3</sub>, 400 MHz, TMS)  $\delta$  1.79–1.90 (2.6H, m), 2.16 (3H, s), 2.25–2.33 (2.6H, m), 2.33 (4.8H, s), 2.89 (1.6H, d, *J* = 16.8 Hz), 2.95 (1H, d, *J* = 16.8 Hz), 3.02 (1H, d, *J* = 16.8 Hz), 3.11 (1.6H, d, *J* = 16.8 Hz), 3.38–3.46 (2.6H, m), 3.55 (4.8H, s), 3.60–3.68 (2.6H, m), 3.62 (3H, s), 3.70 (3H, s), 3.73 (4.8H, s), 3.99 (1H, s), 4.01 (1.6H, s), 5.22

(2.6H, s), 6.59 (1H, d,  $J = 7.6$  Hz), 6.62 (1.6H, d,  $J = 7.6$  Hz), 6.77 (2.6H, dd,  $J_1 = J_2 = 7.2$  Hz), 6.96 (1.6H, d,  $J = 7.6$  Hz), 7.07–7.12 (5.2H, m), 7.22–7.34 (8.8H, m), 7.87–7.90 (5.2H, m), 8.11–8.14 (5.2H, m);  $^{13}\text{C}$  NMR ( $\text{CDCl}_3$ , 100 MHz, TMS)  $\delta$  19.5, 19.6, 37.0, 37.5, 44.0, 44.3, 48.9, 49.2, 51.8, 52.7, 52.8, 64.69, 64.73, 103.8, 104.7, 109.2, 109.5, 119.9, 120.1, 123.4, 123.5, 123.65, 123.70, 125.6, 125.8, 128.5, 128.6, 128.85, 128.88, 129.2, 130.1, 130.7, 131.3, 131.9, 132.2, 132.4, 132.7, 135.5, 135.6, 136.7, 137.9, 142.0, 145.6, 147.4, 147.6, 149.4, 167.2, 167.3, 167.5; HRMS (ESI) Calcd. for  $\text{C}_{31}\text{H}_{30}\text{N}_3\text{O}_8\text{S}^+$  ( $\text{M}^+\text{+H}$ ): 604.1748, found: 604.1748.

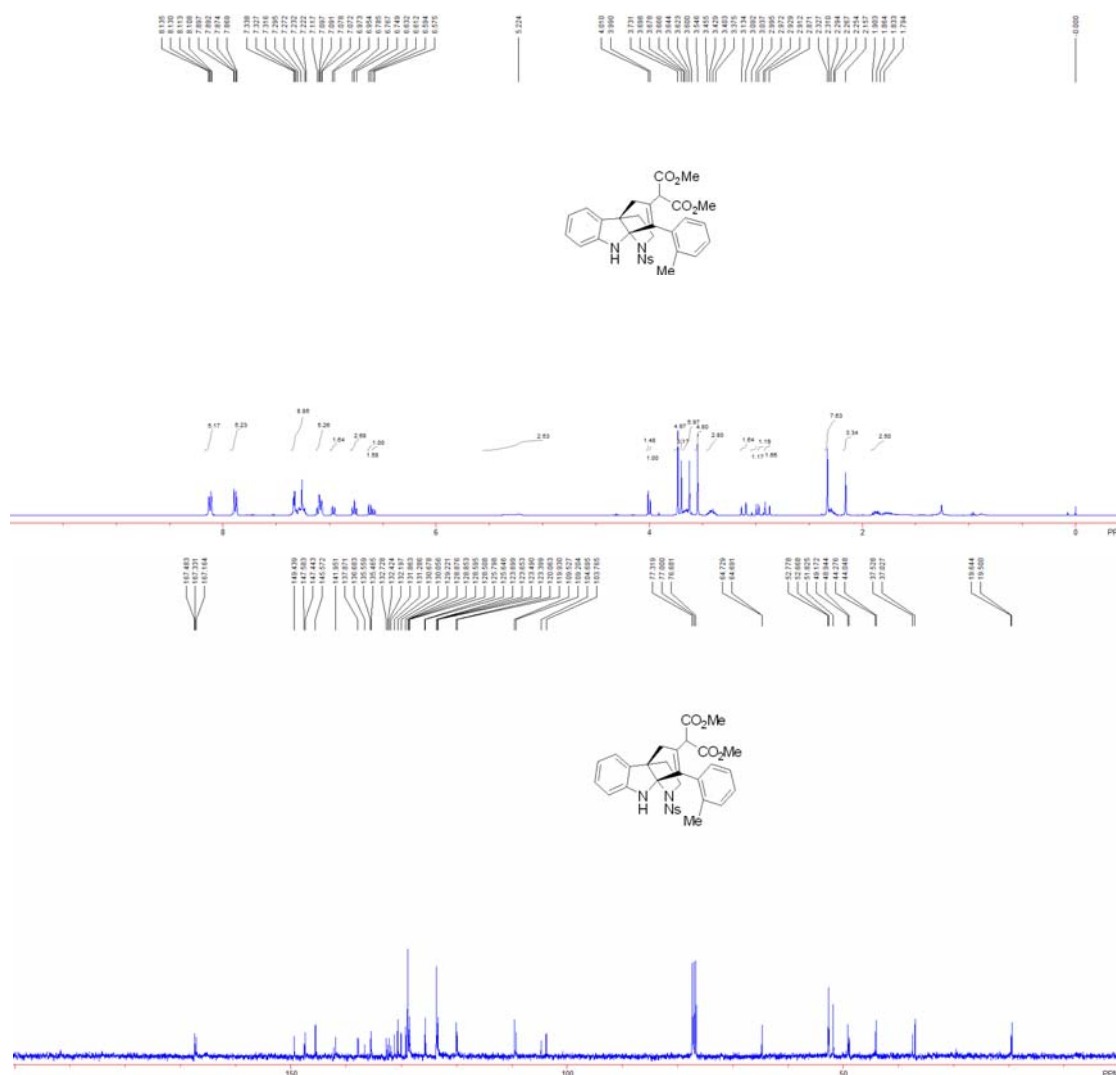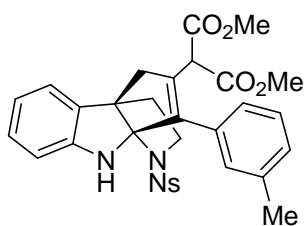

Compound **4k**: 76 mg, 99% yield; a yellow solid; mp. 125–127 °C; IR (neat)  $\nu$  3407.3, 2953.4, 2924.9, 2854.5, 1734.9, 1607.4, 1529.6, 1484.9, 1466.0, 1435.4, 1400.3, 1349.1, 1310.1, 1154.4, 1086.8, 1043.8, 735.8, 618.3

cm<sup>-1</sup>; <sup>1</sup>H NMR (CDCl<sub>3</sub>, 400 MHz, TMS) δ 1.83–1.90 (1H, m), 2.23–2.29 (1H, m), 2.38 (3H, s), 2.88 (1H, d, *J* = 16.8 Hz), 3.02 (1H, d, *J* = 16.8 Hz), 3.47–3.51 (1H, m), 3.56–3.63 (1H, m), 3.60 (3H, s), 3.73 (3H, s), 4.16 (1H, s), 6.65 (1H, d, *J* = 7.6 Hz), 6.77 (1H, dd, *J*<sub>1</sub> = *J*<sub>2</sub> = 7.6 Hz), 7.02–7.13 (4H, m), 7.23 (1H, d, *J* = 7.6 Hz), 7.32 (1H, dd, *J*<sub>1</sub> = *J*<sub>2</sub> = 7.6 Hz), 7.77 (2H, d, *J* = 8.8 Hz), 8.09 (2H, d, *J* = 8.8 Hz); <sup>13</sup>C NMR (CDCl<sub>3</sub>, 100 MHz, TMS) δ 21.4, 37.7, 44.6, 49.1, 51.8, 52.7, 52.8, 64.7, 104.2, 109.6, 119.9, 123.4, 123.6, 126.7, 128.3, 128.6, 128.8, 129.2, 130.2, 132.6, 132.7, 134.9, 138.0, 142.8, 145.9, 147.8, 149.3, 167.4, 167.8; HRMS (ESI) Calcd. for C<sub>31</sub>H<sub>30</sub>N<sub>3</sub>O<sub>8</sub>S<sup>+</sup> (M<sup>+</sup>+H): 604.1748, found: 604.1748.

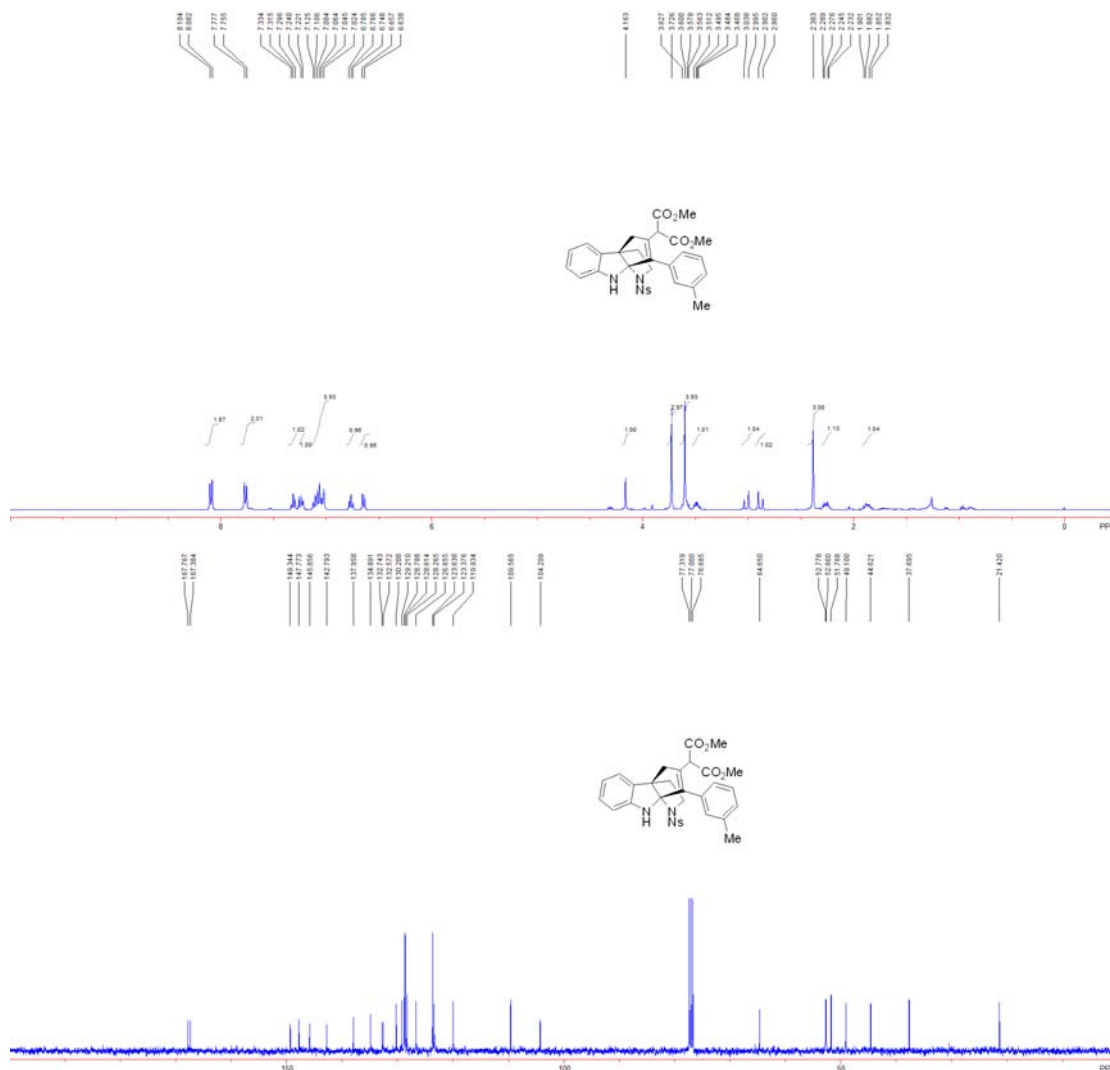

## General procedures and spectroscopic data of compounds 5a-8a

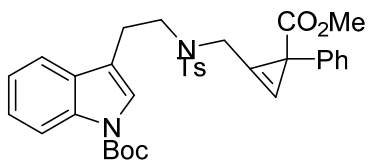

Compound **5a**: 1.01g, 34% yield; a pale yellow oil; IR (neat)  $\nu$  3399, 2932, 2924, 2843, 1734, 1458, 1435, 1339, 1299, 1266, 1067, 735, 654  $\text{cm}^{-1}$ ;  $^1\text{H}$  NMR ( $\text{CDCl}_3$ , 400 MHz, TMS)  $\delta$  1.67 (9H, s), 2.40 (3H, s), 2.88–2.98 (2H, m), 3.48 (2H, t,  $J = 8.0$  Hz), 3.66 (3H, s), 4.48–4.59 (2H, m), 6.41 (1H, t,  $J = 1.6$  Hz), 7.12–7.15 (2H, m), 7.19–7.33 (7H, m), 7.37 (1H, s), 7.41 (1H, d,  $J = 7.6$  Hz), 7.63 (2H, d,  $J = 8.4$  Hz), 8.11 (1H, s);  $^{13}\text{C}$  NMR ( $\text{CDCl}_3$ , 100 MHz, TMS)  $\delta$  21.5, 24.3, 28.2, 33.8, 42.7, 47.1, 52.2, 83.6, 101.1, 115.3, 116.3, 116.7, 118.7, 122.5, 123.4, 124.4, 126.8, 127.4, 128.1, 128.2, 129.6, 130.1, 136.4, 140.0, 143.5, 149.6, 174.5; HRMS (ESI) Calcd. for  $\text{C}_{34}\text{H}_{40}\text{N}_3\text{O}_6\text{S}^+$  ( $\text{M}^+ + \text{NH}_4$ ): 618.2632, found: 618.2623.

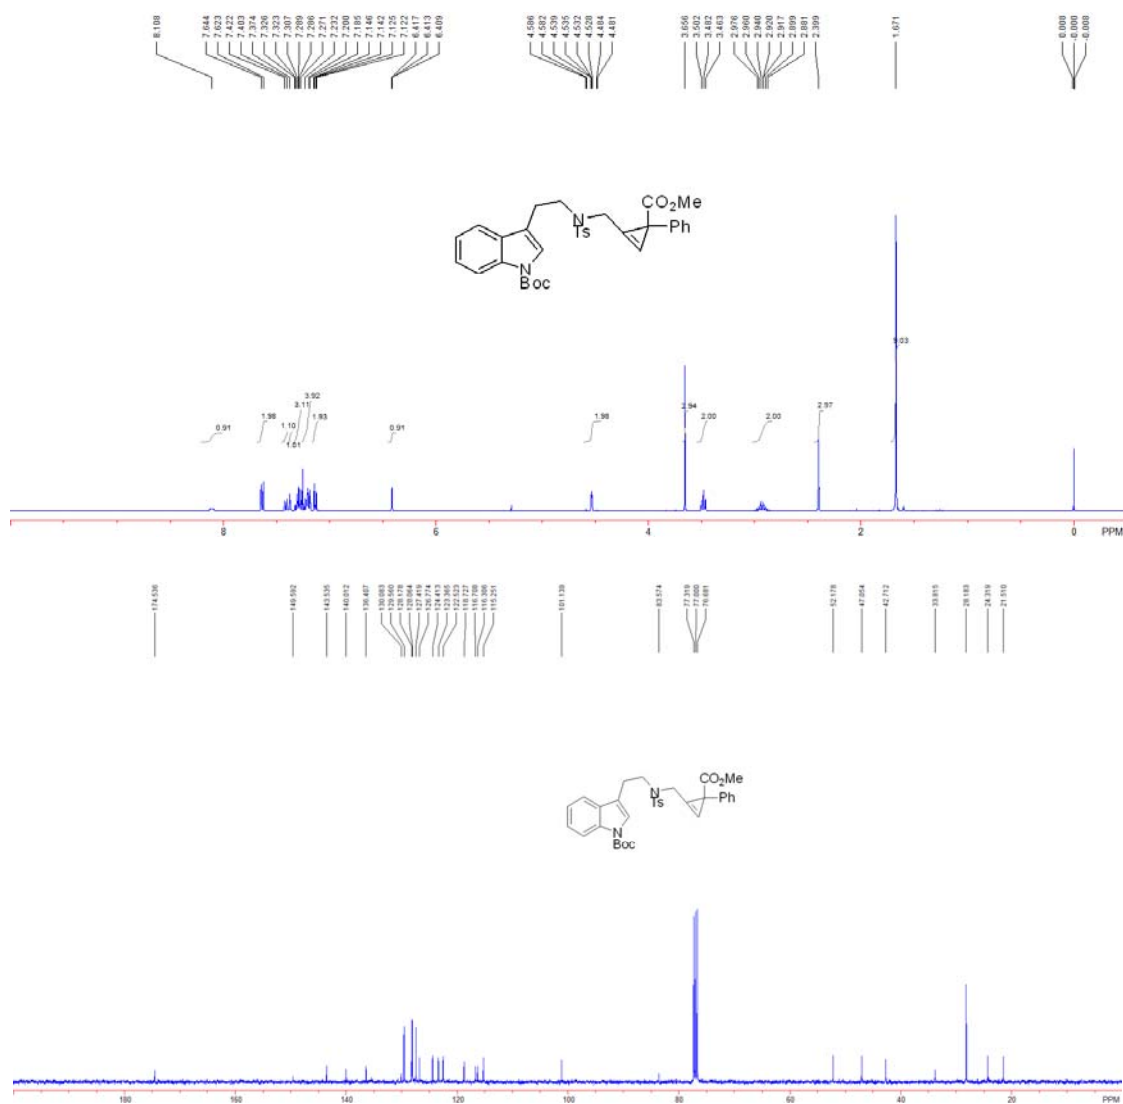

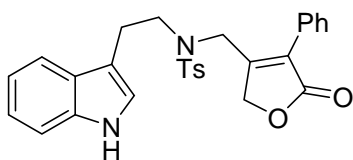

Compound **6a**: 40 mg, 31% yield; a brown solid; mp. 98–100 °C; IR (neat)  $\nu$  3405.1, 2922.7, 2851.9, 1729.5, 1457.2, 1340.5, 1157.1, 1093.9, 1038.4, 814.4, 702.9  $\text{cm}^{-1}$ ;  $^1\text{H}$  NMR ( $\text{CDCl}_3$ , 400 MHz, TMS)  $\delta$  2.40 (3H, s), 2.80 (2H, t,  $J = 7.6$  Hz), 3.34 (2H, t,  $J = 7.6$  Hz), 4.26 (2H, s), 4.84 (2H, s), 6.83 (1H, s), 7.01 (1H, dd,  $J_1 = J_2 = 7.6$  Hz), 7.13–7.19 (2H, m), 7.25–7.31 (5H, m), 7.41–7.42 (3H, m), 7.62 (2H, d,  $J = 8.0$  Hz), 8.11 (1H, s);  $^{13}\text{C}$  NMR ( $\text{CDCl}_3$ , 100 MHz, TMS)  $\delta$  21.5, 24.7, 45.4, 50.5, 71.0, 111.3, 111.4, 118.1, 119.5, 122.15, 122.18, 126.7, 127.2, 128.7, 128.9, 128.97, 129.00, 130.0, 135.1, 136.1, 144.1, 157.5, 172.6; HRMS (ESI) Calcd. for  $\text{C}_{28}\text{H}_{30}\text{N}_3\text{O}_4\text{S}^+$  ( $\text{M}^+ + \text{NH}_4$ ): 504.1952, found: 504.1949.

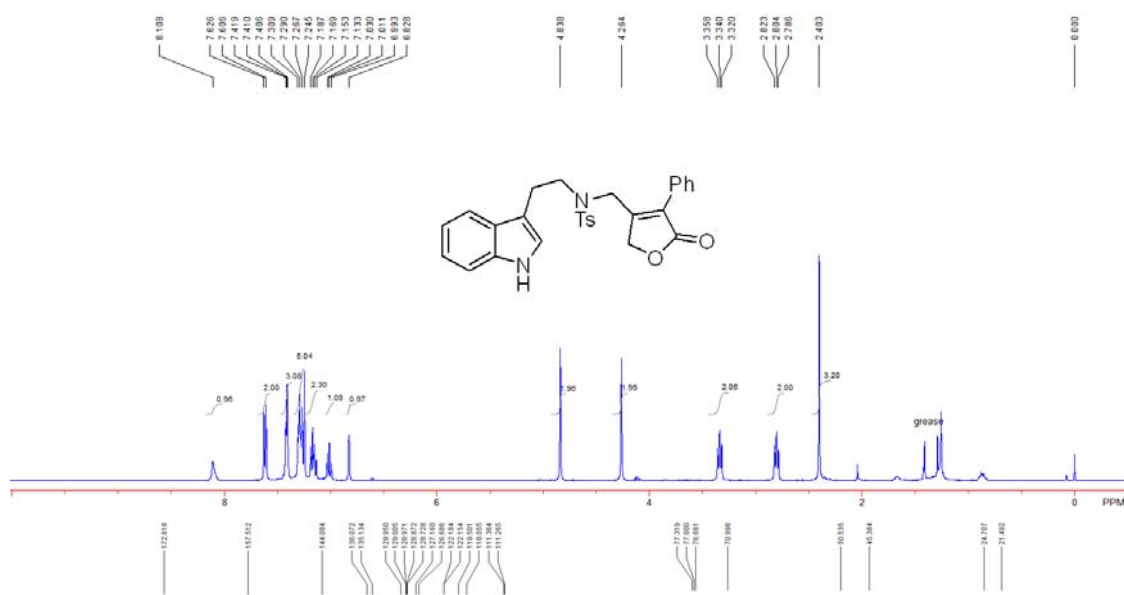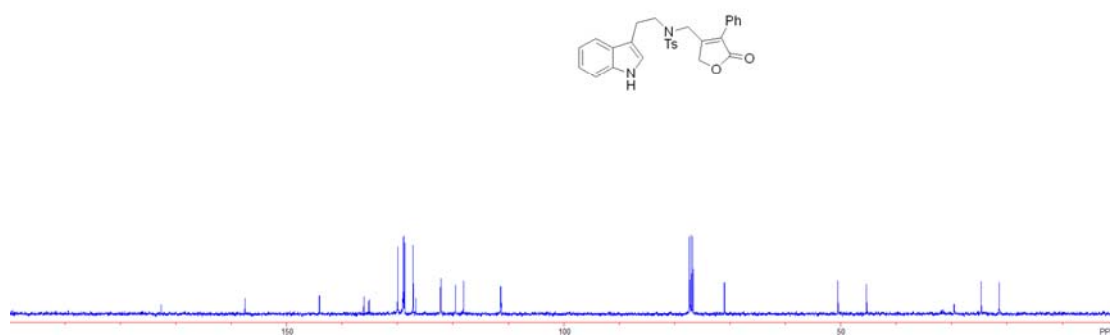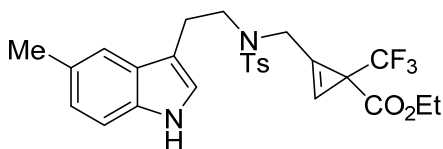





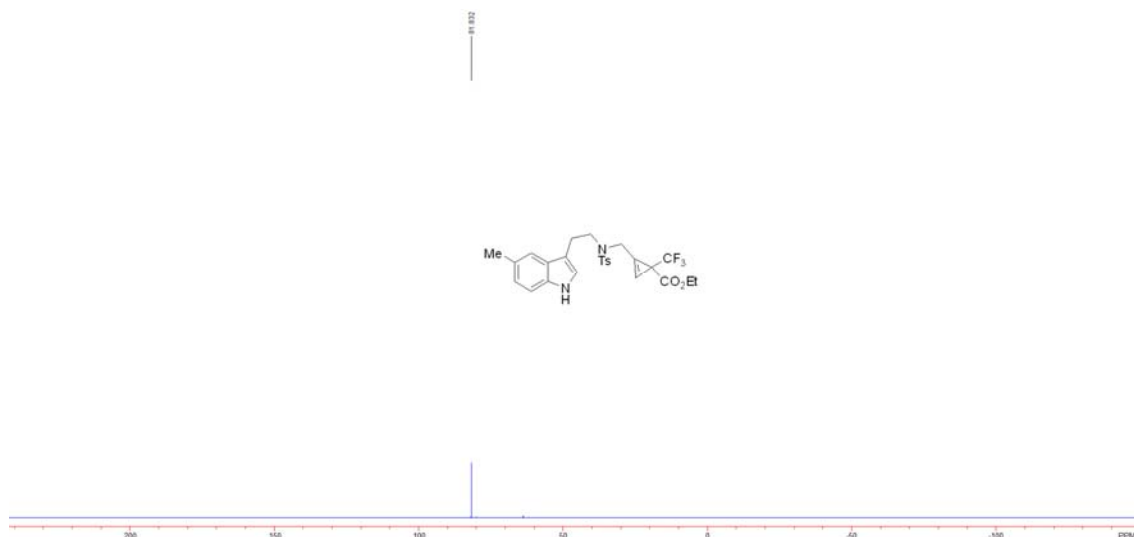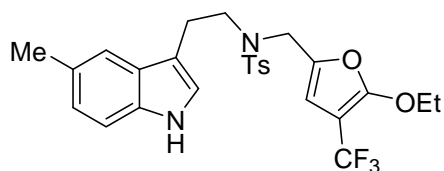

Compound **8a**: 50 mg, 96% yield; a white solid; mp. 108–110 °C; IR (neat)  $\nu$  3417.9, 3373.6, 2986.5, 2928.8, 2862.5, 1737.4, 1645.2, 1598.9, 1451.9, 1391.2, 1329.7, 1268.5, 1155.7, 1112.9, 1032.3, 953.8, 796.0  $\text{cm}^{-1}$ ;  $^1\text{H}$  NMR ( $\text{CDCl}_3$ , 400 MHz, TMS)  $\delta$  1.27 (3H, t,  $J = 7.2$  Hz), 2.38 (3H, s), 2.43 (3H, s), 2.96 (2H, t,  $J = 7.6$  Hz), 3.43 (2H, t,  $J = 7.6$  Hz), 4.06 (2H, q,  $J = 7.2$  Hz), 4.25 (2H, s), 6.03 (1H, s), 6.93 (1H, d,  $J = 2.0$  Hz), 7.00 (1H, d,  $J = 8.0$  Hz), 7.22 (3H, d,  $J = 8.0$  Hz), 7.26 (1H, s), 7.65 (2H, d,  $J = 8.0$  Hz), 7.99 (1H, s);  $^{13}\text{C}$  NMR ( $\text{CDCl}_3$ , 100 MHz, TMS)  $\delta$  14.6, 21.3, 21.4, 25.1, 44.0, 47.9, 68.4, 91.4 (q,  $J = 38.3$  Hz), 108.7 (q,  $J = 2.3$  Hz), 110.9, 111.6, 118.1, 122.28 (q,  $J = 264.6$  Hz), 122.35, 123.7, 127.1, 127.2, 128.7, 129.5, 130.2, 134.5, 137.0, 139.9, 143.3, 156.8 (q,  $J = 4.5$  Hz);  $^{19}\text{F}$  NMR (376 MHz,  $\text{CDCl}_3$ ,  $\text{CFCl}_3$ ): -57.28 (s); HRMS (ESI) Calcd. for  $\text{C}_{26}\text{H}_{31}\text{F}_3\text{N}_3\text{O}_4\text{S}^+$  ( $\text{M}^+ + \text{NH}_4$ ): 538.1982, found: 538.1980.

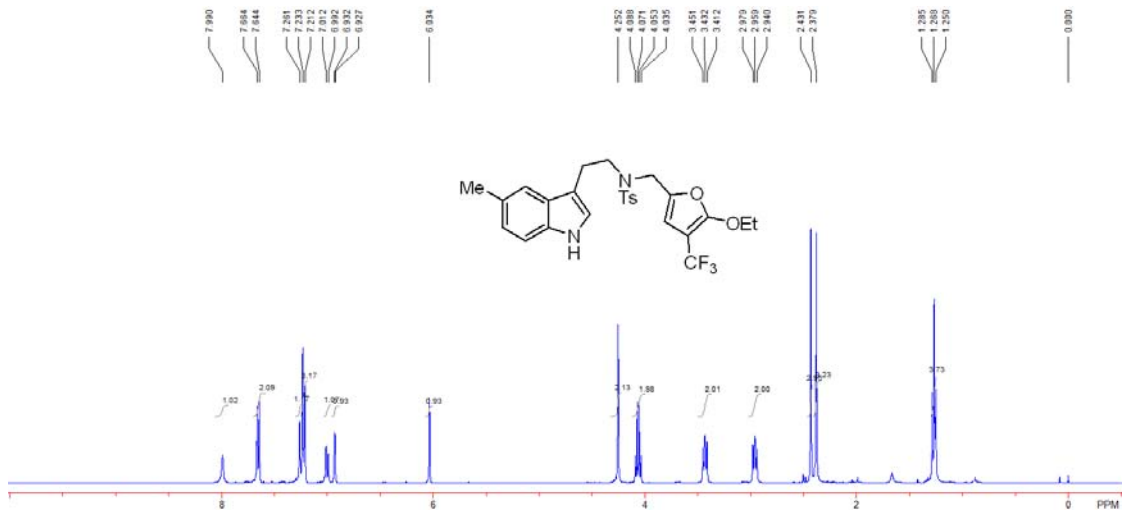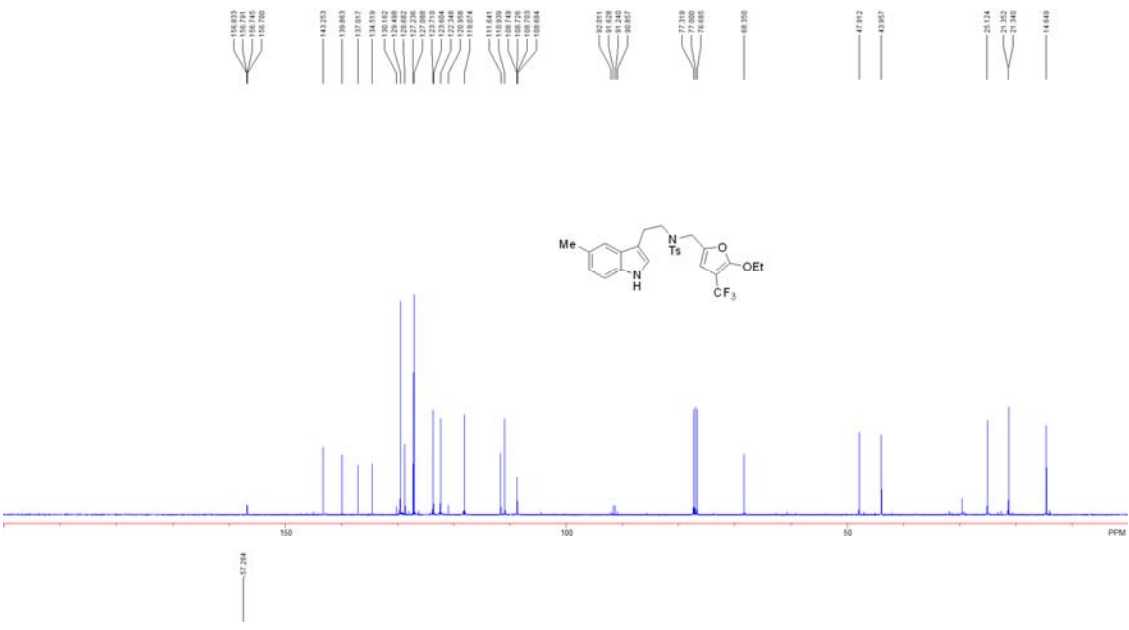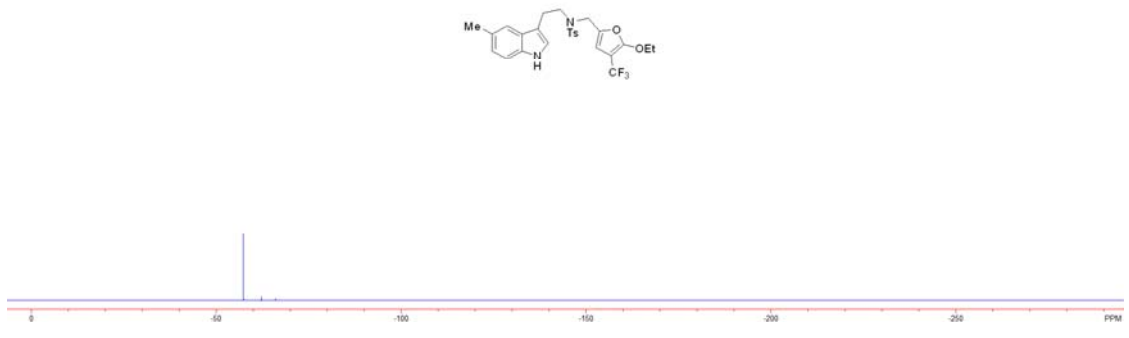

## Transformations of product 4c

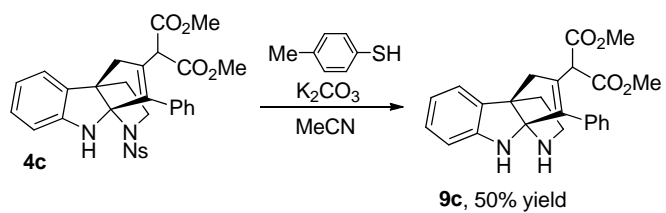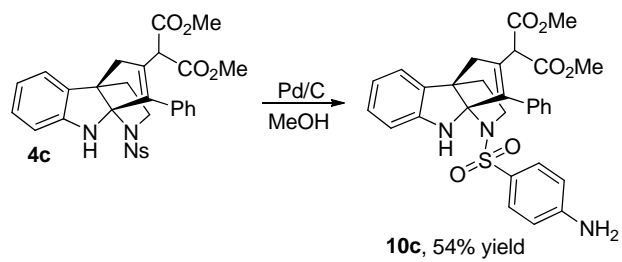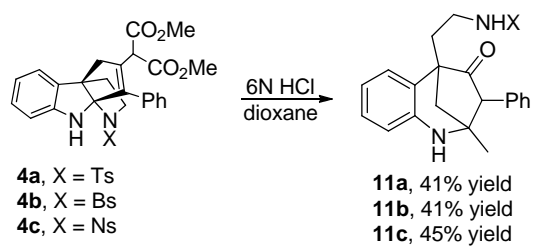

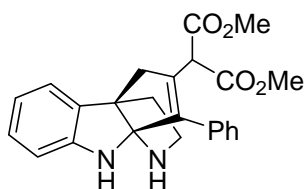

Compound **9c**: 20 mg, 50% yield; a brown oil; IR (neat)  $\nu$  3675, 3195, 2956, 2922, 1742, 1608, 1488, 1472, 1435, 1413, 1316, 1280, 1226, 1183, 1151, 1119, 1062, 1017, 727  $\text{cm}^{-1}$ ;  $^1\text{H}$  NMR ( $\text{CDCl}_3$ , 400 MHz, TMS)  $\delta$  2.11–2.18 (2H, m), 2.24–2.28 (1H, m), 2.89–2.95 (1H, m), 2.98 (1H, d,  $J = 17.6$  Hz), 3.06 (1H, d,  $J = 17.6$  Hz), 3.09–3.13 (1H, m), 3.65 (3H, s), 3.71 (3H, s), 4.35 (1H, s), 6.55 (1H, d,  $J = 7.2$  Hz), 6.77 (1H, dd,  $J_1 = J_2 = 7.2$  Hz), 7.04 (1H, dd,  $J_1 = J_2 = 7.2$  Hz), 7.14 (1H, d,  $J = 7.2$  Hz), 7.39 (5H, s);  $^{13}\text{C}$  NMR ( $\text{CDCl}_3$ , 100 MHz, TMS)  $\delta$  44.1, 46.8, 47.0, 51.8, 52.68, 52.71, 62.2, 103.8, 109.8, 119.4, 124.2, 127.9, 128.2, 128.7, 128.9, 131.7, 134.0, 135.4, 143.2, 149.6, 167.8, 168.0; HRMS (ESI) Calcd. for  $\text{C}_{24}\text{H}_{25}\text{N}_2\text{O}_4^+$  ( $\text{M}^+\text{+H}$ ): 405.1809, found: 405.1810.

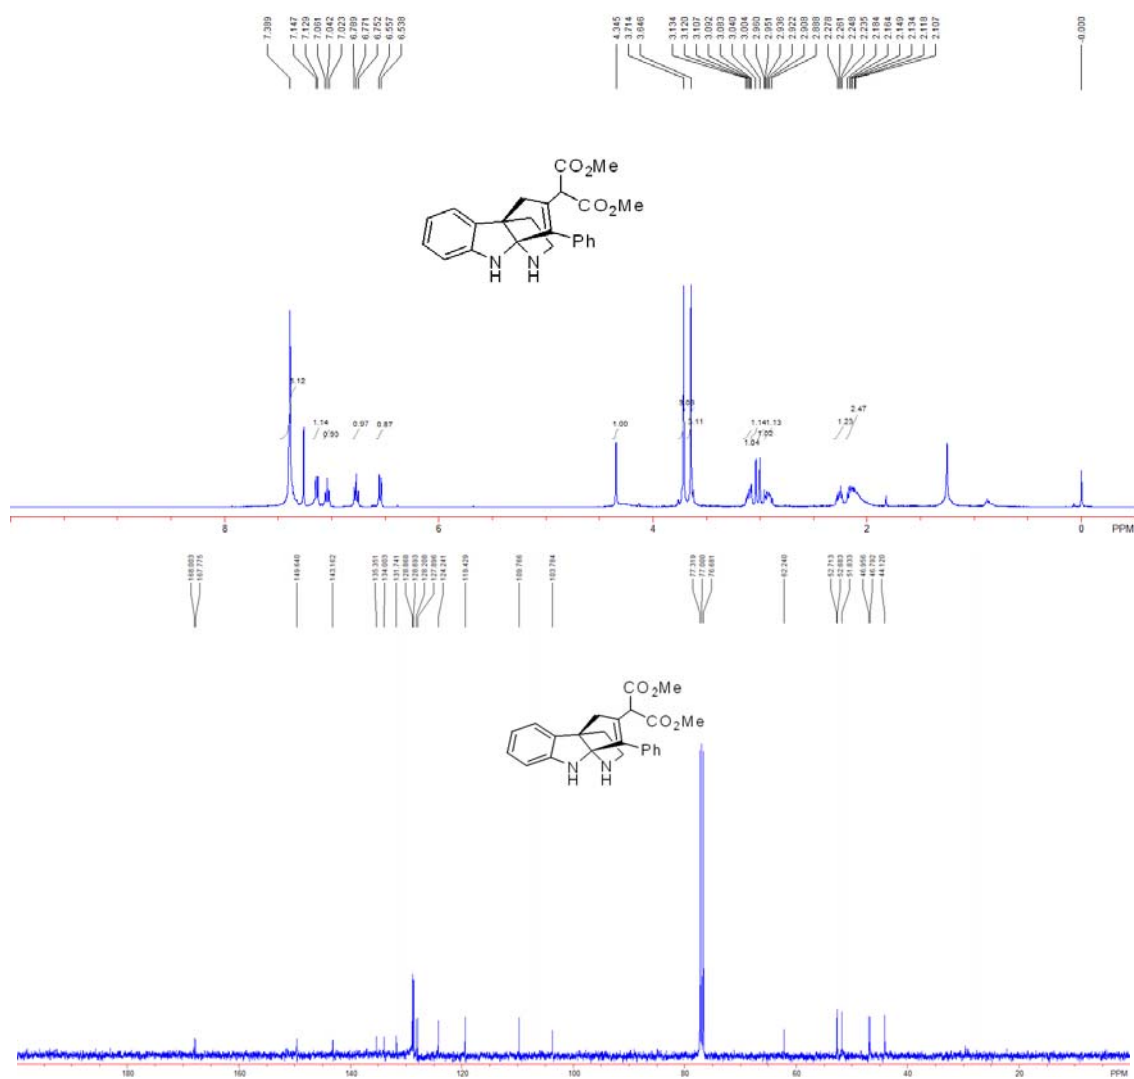

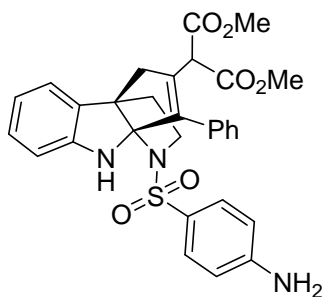

Compound **10c**: 30 mg, 54% yield; a brown oil; IR (neat)  $\nu$  3373, 2972, 2927, 2882, 1734, 1597, 1503, 1485, 1436, 1380, 1313, 1147, 1087, 1046, 880, 683  $\text{cm}^{-1}$ ;  $^1\text{H}$  NMR ( $\text{CDCl}_3$ , 400 MHz, TMS)  $\delta$  1.88–1.95 (1H, m), 2.15–2.21 (1H, m), 2.84 (d,  $J = 16.8$  Hz), 2.97 (d,  $J = 16.8$  Hz), 3.22–3.27 (1H, m), 3.39–3.45 (1H, m), 3.57 (3H, s), 3.70 (3H, s), 4.01 (2H, s), 4.15 (1H, s), 5.60 (1H, s), 6.39 (2H, d,  $J = 8.4$  Hz), 6.59 (1H, d,  $J = 8.0$  Hz), 6.72 (1H, dd,  $J_1 = J_2 = 7.6$  Hz), 7.05–7.09 (2H, m), 7.28–7.33 (4H, m), 7.37–7.42 (3H, m);  $^{13}\text{C}$  NMR ( $\text{CDCl}_3$ , 100 MHz, TMS)  $\delta$  37.3, 44.1, 48.7, 51.7, 52.5, 52.7, 64.5, 103.6, 109.1, 113.4, 119.0, 123.2, 127.4, 128.0, 128.4, 129.5, 129.6, 132.4, 133.5, 133.7, 143.8, 148.3, 150.2, 167.5, 167.8; HRMS (ESI) Calcd. for  $\text{C}_{30}\text{H}_{30}\text{N}_3\text{O}_6\text{S}^+$  ( $\text{M}^+ + \text{H}$ ): 560.1850, found: 560.1851.

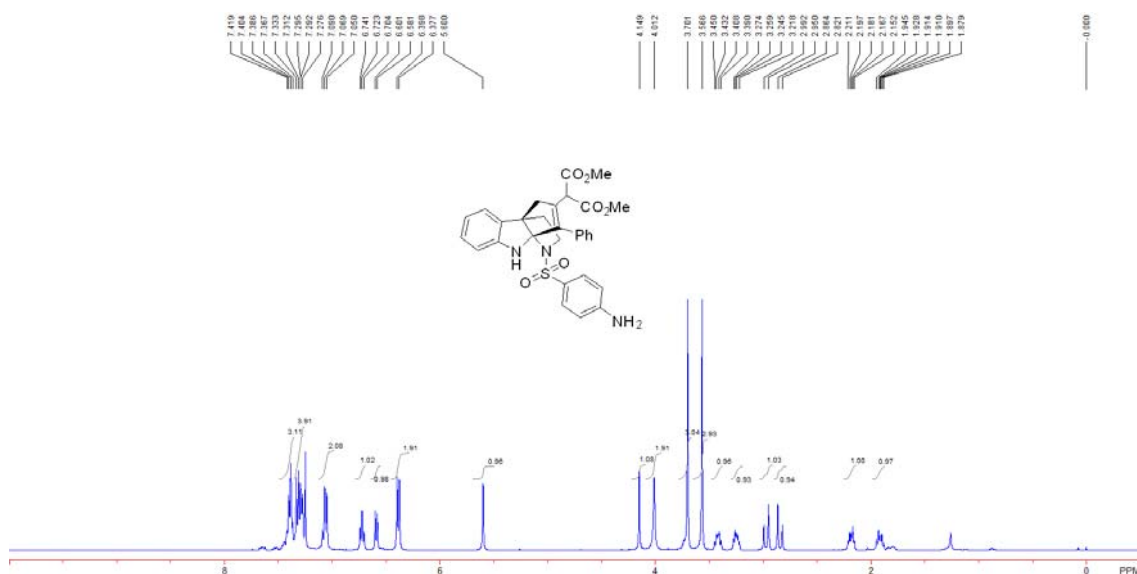





132.4, 133.4, 138.5, 143.3, 208.9; HRMS (ESI) Calcd. for  $C_{26}H_{26}BrN_2O_3S^+$  ( $M^+ + H$ ): 525.0842, found: 525.0841.

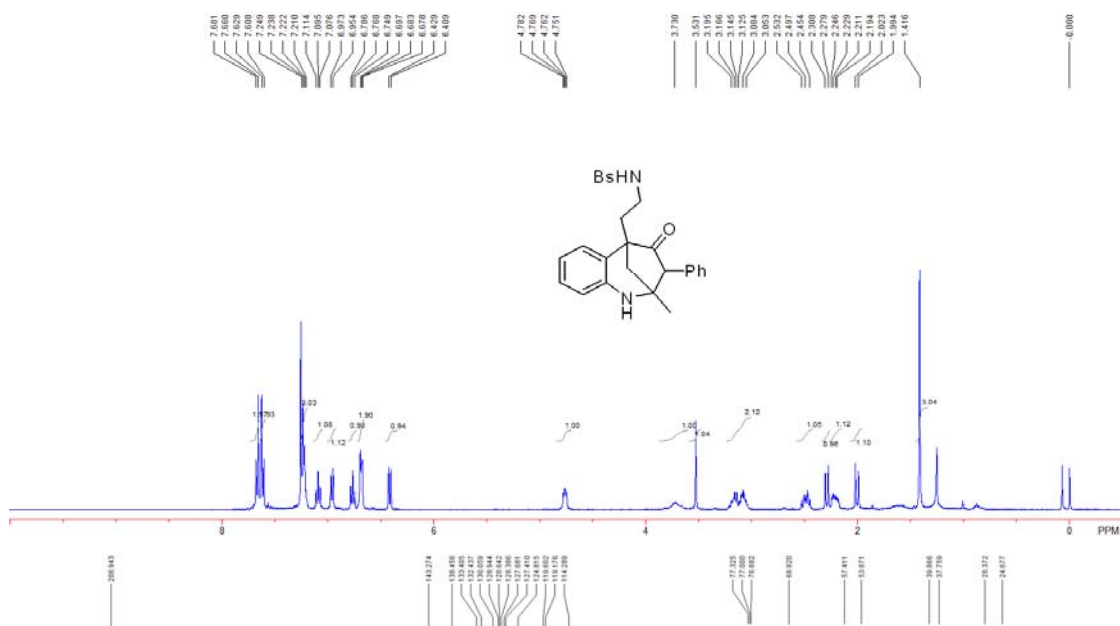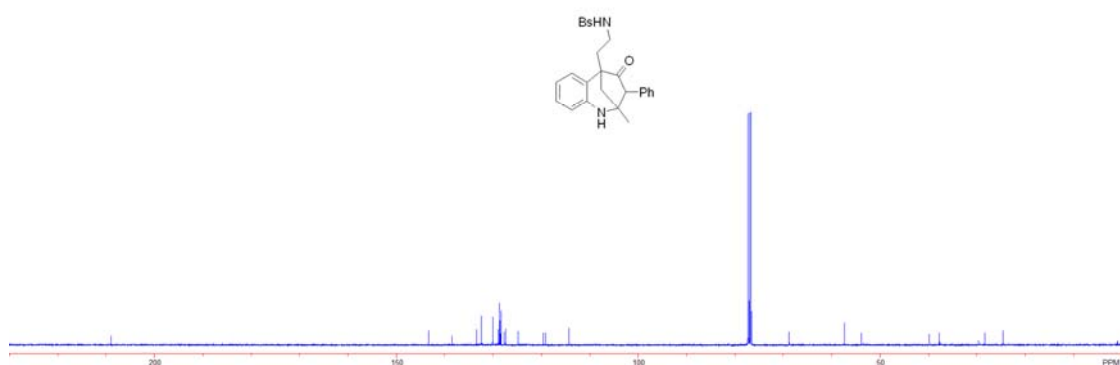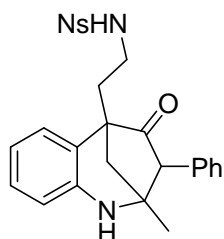

Compound **11c**: 44 mg, 45% yield; a yellow solid; mp. 103–105 °C; IR (neat)  $\nu$  2926, 2854, 2362, 1733, 1606, 1529, 1484, 1349, 1310, 1164, 1092, 855, 737  $cm^{-1}$ ;  $^1H$  NMR ( $CDCl_3$ , 400 MHz, TMS)  $\delta$  1.44 (3H, s), 2.04 (1H, d,  $J = 11.6$  Hz), 2.22–2.28 (1H, m), 2.32 (1H, d,  $J = 11.6$  Hz), 2.47–2.55 (1H, m), 3.10–3.14 (1H, m), 3.19–3.26 (1H, m), 3.57 (1H, s), 3.75 (1H, s), 4.95–4.97 (1H, m), 6.44 (1H, d,  $J = 8.0$  Hz), 6.69 (2H, d,  $J = 6.4$  Hz), 6.78 (1H, dd,  $J_1 = J_2 = 7.2$  Hz), 6.98 (1H, d,  $J = 8.0$  Hz), 7.11 (1H, dd,  $J_1 = J_2 = 7.2$  Hz), 7.20–7.24 (3H, m), 7.98 (2H, d,  $J = 8.4$  Hz), 8.31 (2H, d,  $J = 8.4$  Hz);  $^{13}C$  NMR ( $CDCl_3$ , 100 MHz, TMS)  $\delta$  24.7, 28.6, 37.9,



40.0, 53.9, 57.4, 68.9, 114.4, 119.2, 119.3, 124.4, 124.8, 127.5, 128.3, 128.4, 129.1, 130.0, 133.3, 143.3, 145.3, 150.1, 208.9; HRMS (ESI) Calcd. for C<sub>26</sub>H<sub>26</sub>N<sub>3</sub>O<sub>5</sub>S<sup>+</sup> (M<sup>+</sup>+H): 492.1588, found: 492.1587.

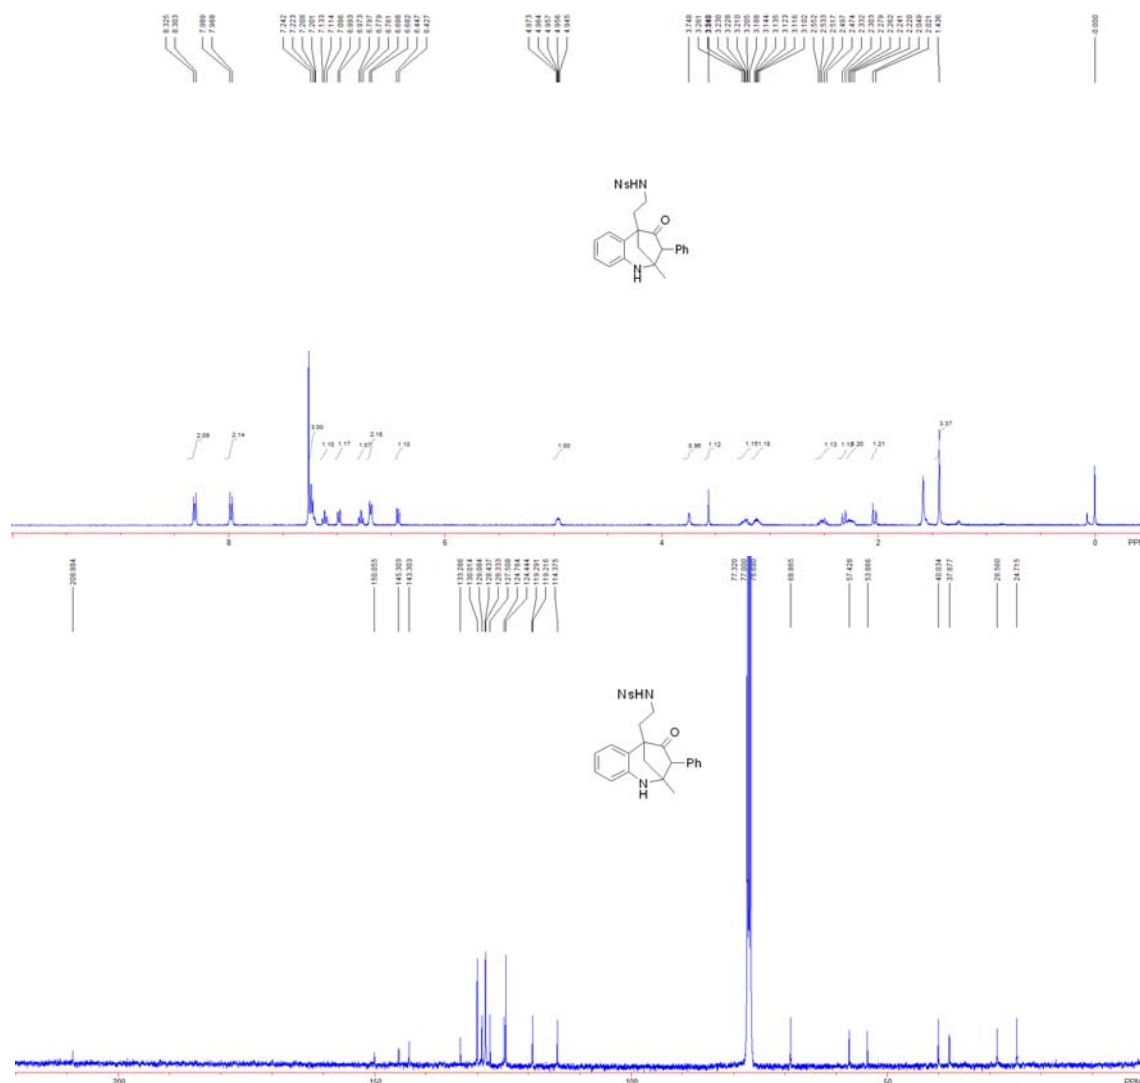

# Deuterium labeling experiment

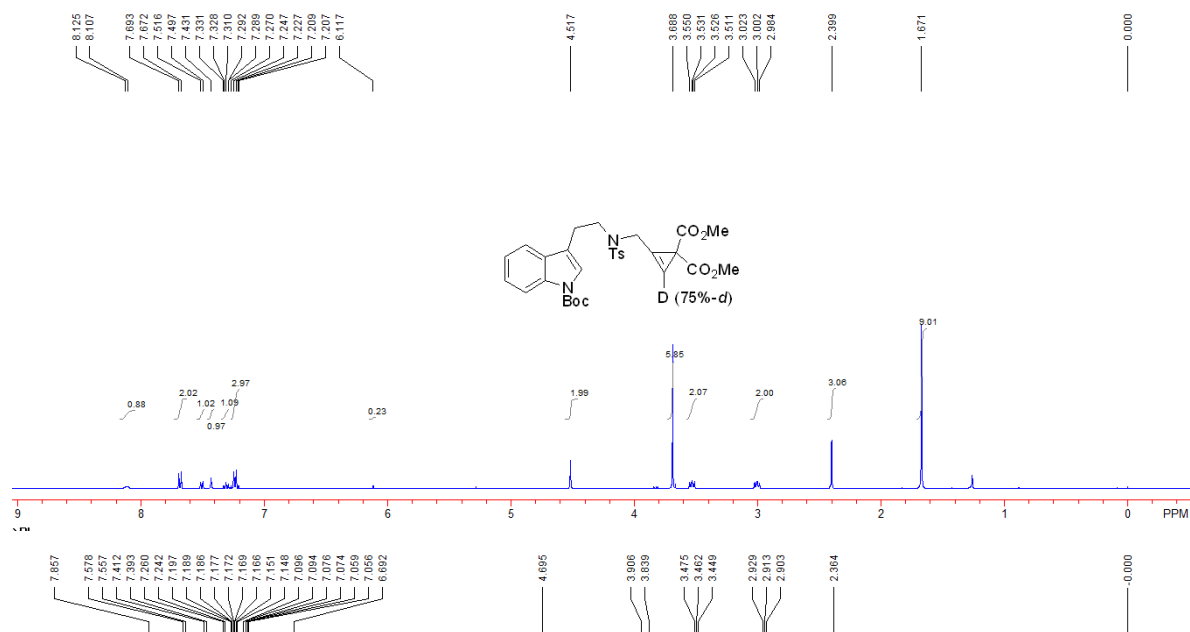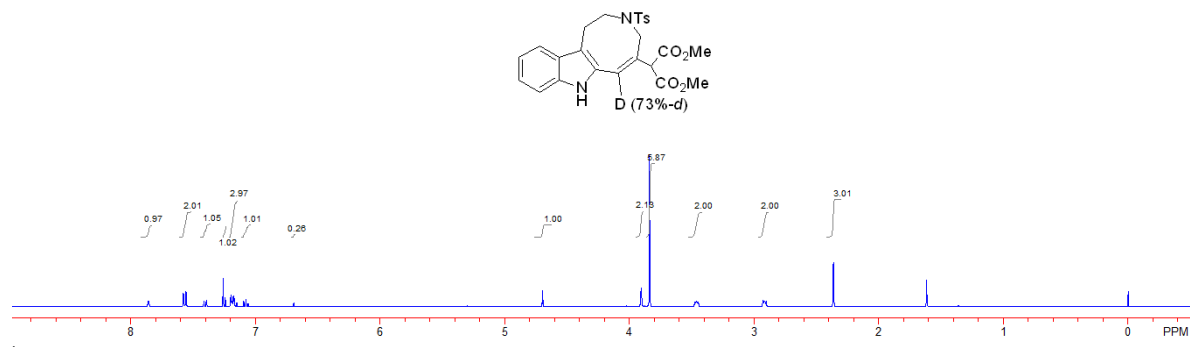

## X-ray Crystal Data of 2b, 4c, 6a, 8a and 11c

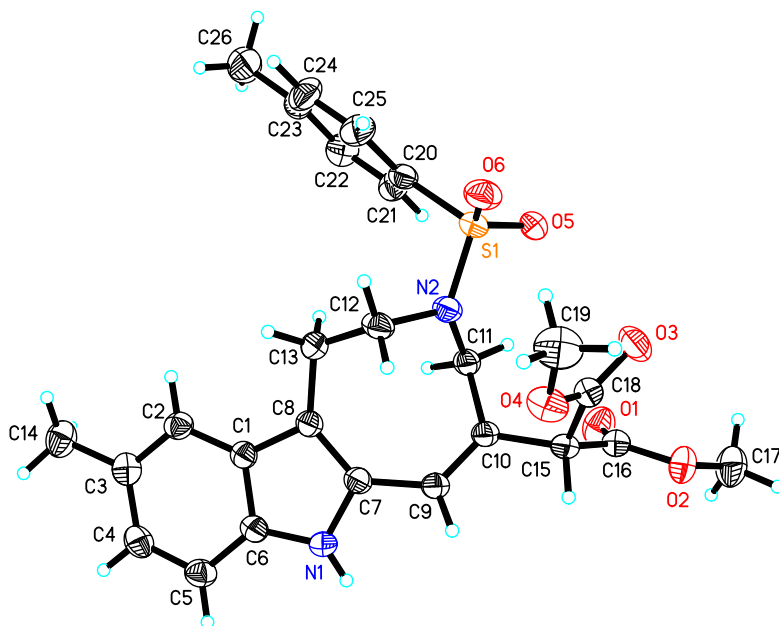

**Figure SI-1.** ORTEP Drawing of **2b**

The crystal data of **2b** have been deposited in CCDC with number 899936. Empirical Formula:  $C_{26}H_{28}N_2O_6S$ ; Formula Weight: 496.56; Crystal Color, Habit: colorless, Crystal Dimensions: 0.276 x 0.211 x 0.142 mm; Crystal System: Orthorhombic; Lattice Parameters:  $a = 19.8378(16)\text{\AA}$ ,  $b = 9.3737(8)\text{\AA}$ ,  $c = 13.4463(12)\text{\AA}$ ,  $\alpha = 90^\circ$ ,  $\beta = 90^\circ$ ,  $\gamma = 90^\circ$ ,  $V = 2500.4(4)\text{\AA}^3$ ; Space group:  $Pna2(1)/n$ ;  $Z = 4$ ;  $D_{calc} = 1.319\text{ g/cm}^3$ ;  $F_{000} = 1048$ ; Final R indices  $[I > 2\sigma(I)]$   $R1 = 0.0417$ ,  $wR2 = 0.0989$ .

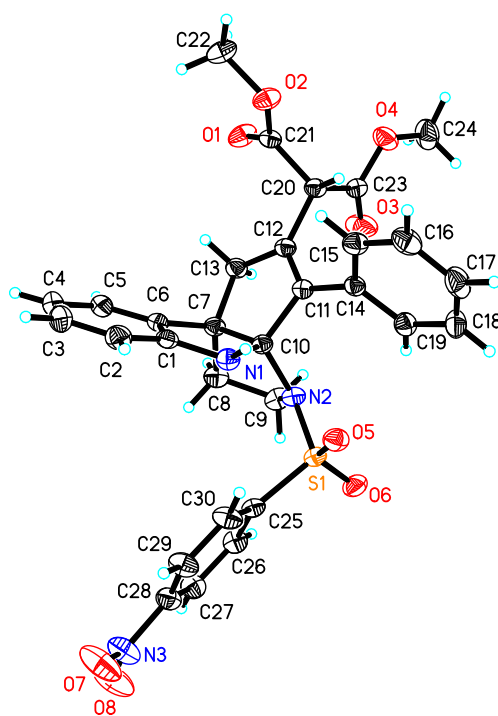

**Figure SI-2.** ORTEP Drawing of **4c**

The crystal data of **4c** have been deposited in CCDC with number 1409839. Empirical Formula:  $C_{30}H_{27}N_3O_8S$ ; Formula Weight: 589.60; Crystal Color, Habit: colorless, Crystal Dimensions: 0.210 x 0.170 x 0.130 mm<sup>3</sup>; Crystal System: Monoclinic; Lattice Parameters:  $a = 14.3817(15)\text{\AA}$ ,  $b = 10.8082(11)\text{\AA}$ ,  $c = 19.0025(18)\text{\AA}$ ,  $\alpha = 90^\circ$ ,  $\beta = 109.283(2)^\circ$ ,  $\gamma = 90^\circ$ ,  $V = 2788.0(5)\text{\AA}^3$ ; Space group: P 21/n; Z = 4;  $D_{calc} = 1.405\text{ g/cm}^3$ ;  $F_{000} = 1232$ ; Final R indices [ $I > 2\sigma(I)$ ] R1 = 0.0486, wR2 = 0.1209.

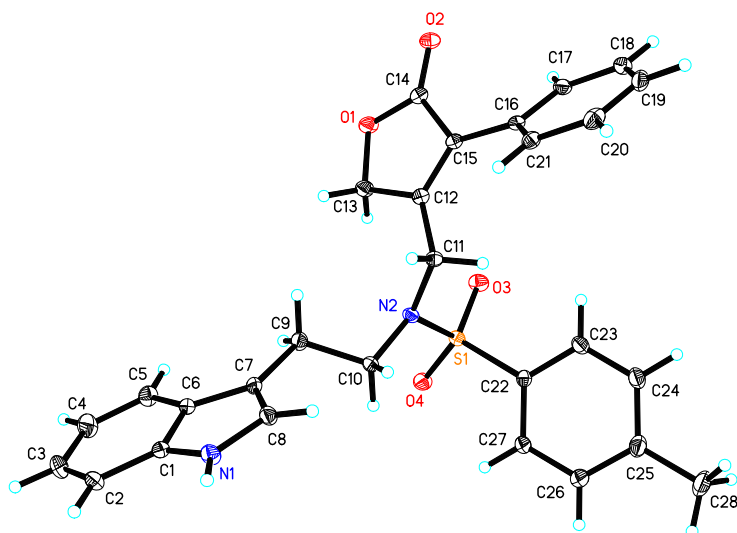

**Figure SI-3.** ORTEP Drawing of **6a**

The crystal data of **6a** have been deposited in CCDC with number 1401372. Empirical Formula:  $C_{28}H_{26}N_2O_4S$ ; Formula Weight: 486.57; Crystal Color, Habit: colorless, Crystal Dimensions: 0.25 x 0.2 x 0.18 mm<sup>3</sup>; Crystal System: Orthorhombic; Lattice Parameters:  $a = 12.3454(9)\text{\AA}$ ,  $b = 8.6610(6)\text{\AA}$ ,  $c = 22.8626(16)\text{\AA}$ ,  $\alpha = 90^\circ$ ,  $\beta = 90^\circ$ ,  $\gamma = 90^\circ$ ,  $V = 2444.5(3)\text{\AA}^3$ ; Space group:  $Pn\ a\ 2_1$ ;  $Z = 4$ ;  $D_{calc} = 1.322\text{ g/cm}^3$ ;  $F_{000} = 1024$ ; Final R indices  $[I > 2\sigma(I)]$   $R1 = 0.0411$ ,  $wR2 = 0.0916$ .

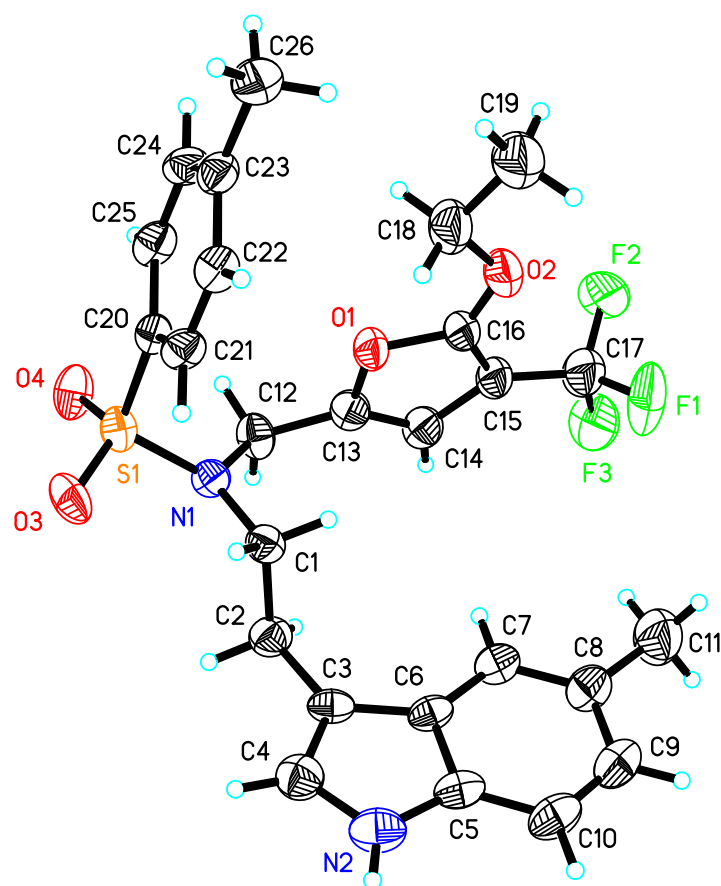

**Figure SI-4.** ORTEP Drawing of **8a**

The crystal data of **8a** have been deposited in CCDC with number 920329. Empirical Formula:  $C_{26}H_{27}F_3N_2O_4S$ ; Formula Weight: 520.56; Crystal Color, Habit: colorless, Crystal Dimensions: 0.224 x 0.176 x 0.112 mm; Crystal System: Triclinic; Lattice Parameters:  $a = 9.9556(15)\text{\AA}$ ,  $b = 14.589(2)\text{\AA}$ ,  $c = 18.274(3)\text{\AA}$ ,  $\alpha = 81.682(3)^\circ$ ,  $\beta = 76.959(4)^\circ$ ,  $\gamma = 88.485(4)^\circ$ ,  $V = 2558.5(6)\text{\AA}^3$ ; Space group: P-1;  $Z = 4$ ;  $D_{calc} = 1.351\text{ g/cm}^3$ ;  $F_{000} = 1088$ ; Final R indices [ $I > 2\sigma(I)$ ]  $R1 = 0.0645$ ,  $wR2 = 0.1423$ .

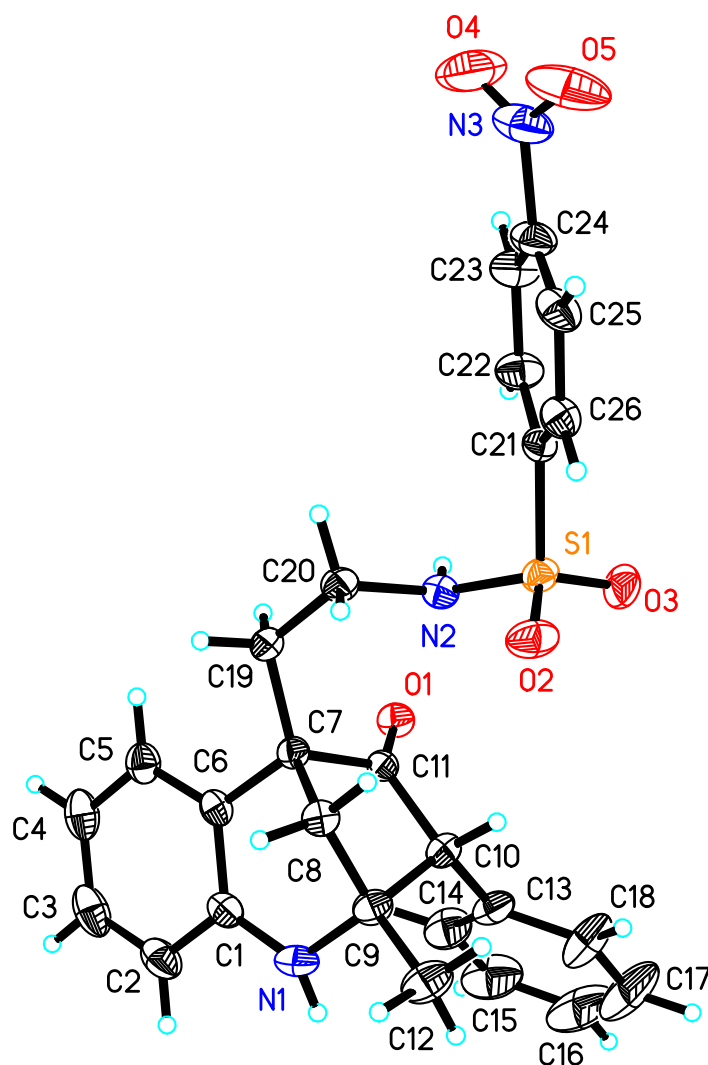

**Figure SI-5.** ORTEP Drawing of **11c**

The crystal data of **11c** have been deposited in CCDC with number 1439968. Empirical Formula:  $C_{26}H_{25}N_3O_5S$ ; Formula Weight: 491.55; Crystal Color, Habit: colorless, Crystal Dimensions: 0.220 x 0.180 x 0.120 mm<sup>3</sup>; Crystal System: Triclinic; Lattice Parameters:  $a = 9.3636(17)\text{\AA}$ ,  $b = 10.8898(19)\text{\AA}$ ,  $c = 12.521(2)\text{\AA}$ ,  $\alpha = 99.750(4)^\circ$ ,  $\beta = 95.533(4)^\circ$ ,  $\gamma = 107.818(4)^\circ$ ,  $V = 1182.9(4)\text{\AA}^3$ ; Space group: P -1;  $Z = 2$ ;  $D_{calc} = 1.380\text{ g/cm}^3$ ;  $F_{000} = 516$ ; Final R indices [ $I > 2\sigma(I)$ ]  $R1 = 0.0514$ ,  $wR2 = 0.1292$ .
